# Supplementary material for: On the mechanism of the Shapiro reaction: understanding the regioselectivity
Source: Royal Society of Chemistry journal article supplement (doi:10.1039/c5ra05141j), 2015-01-01
Supplement: c5ra05141j1.pdf [file c5ra05141j1.pdf]

Electronic Supplementary Information for

**On the Mechanism of the Shapiro Reaction: Understanding the Regioselectivity**

Ignacio Funes-Ardoiz, Raúl Losantos, Diego Sampedro\*

Departamento de Química, Centro de Investigación en Síntesis Química (CISQ),  
Universidad de La Rioja, C/ Madre de Dios, 51, 26006, Logroño (Spain).

E-mail: [diego.sampedro@unirioja.es](mailto:diego.sampedro@unirioja.es)

**Table of Contents**

|                                                                                                             |   |
|-------------------------------------------------------------------------------------------------------------|---|
| 1. Cartesian coordinates and calculated potential energies (atomic units) of the optimized structures ..... | 2 |
|-------------------------------------------------------------------------------------------------------------|---|

# 1. Cartesian coordinates and calculated potential energies (atomic units) of the optimized structures

## THF

E= -232.449958 H

|   |             |            |             |
|---|-------------|------------|-------------|
| C | -2.92235300 | 1.62350400 | 0.00000000  |
| O | -1.49345000 | 1.64020100 | 0.00000000  |
| C | -0.97622900 | 2.97235200 | 0.00000000  |
| C | -2.16065300 | 3.96095600 | -0.00000100 |
| C | -3.43237800 | 3.07938100 | -0.00000100 |
| H | -3.26722600 | 1.07184300 | -0.88565900 |
| H | -3.26722700 | 1.07184300 | 0.88565800  |
| H | -0.33898300 | 3.10203800 | 0.88568000  |
| H | -0.33898200 | 3.10203700 | -0.88567900 |
| H | -2.12792200 | 4.60997200 | 0.88025800  |
| H | -2.12792200 | 4.60997100 | -0.88026100 |
| H | -4.05134100 | 3.27673600 | 0.88022100  |
| H | -4.05134100 | 3.27673500 | -0.88022300 |

## Tosyl

E= -819.668544 H

|   |             |             |             |
|---|-------------|-------------|-------------|
| C | -2.49923400 | -0.89392300 | -0.30002500 |
| C | -2.88264100 | 0.44471000  | -0.42134200 |
| C | -3.84795200 | 0.98521400  | 0.42900700  |
| C | -4.45307200 | 0.20272700  | 1.42644900  |
| C | -4.06333300 | -1.13923900 | 1.53710800  |
| C | -3.09579600 | -1.68098700 | 0.68512500  |
| C | -5.48752600 | 0.80000800  | 2.35241100  |
| S | -1.12132300 | -1.57714800 | -1.35389500 |
| O | -1.31477300 | -0.80083800 | -2.65880500 |
| O | -1.49521800 | -3.05906800 | -1.43427600 |
| H | -2.43024300 | 1.05086900  | -1.20284100 |
| H | -4.14487400 | 2.02759900  | 0.31748000  |
| H | -4.52849000 | -1.76717100 | 2.29586600  |
| H | -2.80936100 | -2.72707900 | 0.76535500  |
| H | -5.94193700 | 0.03572200  | 2.99209600  |
| H | -5.04778000 | 1.56205100  | 3.01011200  |
| H | -6.29392100 | 1.29172700  | 1.79344100  |

## Butane

E= -158.4612146 H

|   |             |             |             |
|---|-------------|-------------|-------------|
| C | -4.42193100 | -1.37518000 | -0.01386100 |
| H | -4.08473100 | -2.41937500 | -0.04916800 |
| H | -4.08110500 | -0.88675000 | -0.93601400 |
| H | -5.51893100 | -1.38079500 | -0.02740400 |
| C | -3.88050500 | -0.65904800 | 1.22685100  |
| H | -4.26518100 | 0.37088900  | 1.25178100  |
| H | -4.26789200 | -1.15128000 | 2.13090100  |
| C | -2.34822300 | -0.62544200 | 1.28920500  |

|   |             |             |            |
|---|-------------|-------------|------------|
| H | -1.96083400 | -0.13320300 | 0.38515900 |
| H | -1.96354900 | -1.65537900 | 1.26426700 |
| C | -1.80679800 | 0.09067100  | 2.52992800 |
| H | -2.14771800 | -0.39770300 | 3.45207700 |
| H | -0.70979900 | 0.09618600  | 2.54353000 |
| H | -2.14390600 | 1.13489700  | 2.56518700 |

## TS<sub>Inv</sub>

E= -1244.080595 H

|   |             |             |             |
|---|-------------|-------------|-------------|
| C | 1.17258800  | 4.96399600  | -2.05364400 |
| C | 1.16593400  | 4.07710600  | -0.80157300 |
| C | 1.37421500  | 2.58983000  | -1.11639600 |
| C | 1.36319800  | 1.69049200  | 0.13558300  |
| C | 1.61290300  | 0.22253300  | -0.20351100 |
| N | 0.67431200  | -0.56563100 | -0.48914300 |
| N | -0.27457400 | -1.40281300 | -0.70709000 |
| C | -2.65148500 | -0.57452300 | 0.53312600  |
| C | -2.83666200 | 0.72075700  | 1.01521200  |
| C | -3.39121600 | 0.89671700  | 2.28400600  |
| C | -3.75879900 | -0.20007600 | 3.07392200  |
| C | -3.56037500 | -1.49360800 | 2.55940700  |
| C | -3.00972600 | -1.69031800 | 1.29802500  |
| C | -4.35196700 | -0.00912700 | 4.44707600  |
| S | -1.92727200 | -0.82371700 | -1.08038300 |
| O | -1.85906200 | 0.47901300  | -1.76040800 |
| O | -2.54180700 | -1.99546200 | -1.72902200 |
| H | 2.12504400  | 4.82861300  | -2.58802100 |
| H | 0.38568800  | 4.62317800  | -2.74293700 |
| H | 0.21199300  | 4.20571600  | -0.26864500 |
| H | 1.95163800  | 4.41687900  | -0.11024900 |
| H | 2.32773000  | 2.46313100  | -1.64892300 |
| H | 0.58647300  | 2.24434300  | -1.79915100 |
| H | 0.39474700  | 1.78069200  | 0.64175600  |
| H | 2.13530700  | 2.03564200  | 0.83730700  |
| H | -0.09693800 | -2.21563200 | -1.31124100 |
| H | -2.56560600 | 1.57509100  | 0.40470600  |
| H | -3.54233700 | 1.90437100  | 2.66202500  |
| H | -3.84521600 | -2.35660700 | 3.15623800  |
| H | -2.86825800 | -2.69389700 | 0.90982800  |
| H | -3.67869700 | -0.39424400 | 5.22371100  |
| H | -4.54049900 | 1.04763000  | 4.65903700  |
| H | -5.29904800 | -0.55270000 | 4.54748200  |
| C | 3.06732800  | -0.22597600 | -0.22726900 |
| H | 3.49793900  | -0.19092600 | 0.78310900  |
| H | 3.15840300  | -1.24688800 | -0.60946400 |
| H | 3.67665300  | 0.43993100  | -0.85277100 |
| C | 0.97095100  | 6.45622200  | -1.75856300 |
| H | 0.01790500  | 6.59690500  | -1.22838100 |
| H | 1.75722700  | 6.80062000  | -1.07120600 |
| C | 0.98369800  | 7.32477800  | -3.01978900 |
| H | 0.18402400  | 7.03252400  | -3.71246100 |
| H | 0.84111400  | 8.38517300  | -2.77799800 |
| H | 1.93634600  | 7.23175100  | -3.55703300 |

**1a**

E= -1244.133148 H

|   |             |             |             |
|---|-------------|-------------|-------------|
| C | 0.98152100  | 5.18970800  | -0.69771400 |
| C | 1.93387200  | 4.06973000  | -0.25920000 |
| C | 1.32826600  | 2.66649000  | -0.39639200 |
| C | 2.30997900  | 1.56431700  | 0.00917200  |
| C | 1.80983600  | 0.14340000  | -0.10544400 |
| N | 0.58600800  | -0.04438400 | -0.44570800 |
| N | 0.13779100  | -1.36474400 | -0.49865600 |
| C | -2.53352300 | -0.88259000 | -0.29796500 |
| C | -2.93540600 | 0.44880500  | -0.43195400 |
| C | -3.89448500 | 0.95401700  | 0.44212100  |
| C | -4.45907900 | 0.15076500  | 1.44587400  |
| C | -4.03911600 | -1.18318100 | 1.55079600  |
| C | -3.07837100 | -1.70714700 | 0.68784700  |
| C | -5.48720900 | 0.71862000  | 2.39177700  |
| S | -1.30386900 | -1.54930600 | -1.40610200 |
| O | -1.29221600 | -0.73637000 | -2.62922300 |
| O | -1.45033400 | -3.00940100 | -1.49888700 |
| H | 0.68704000  | 5.02559900  | -1.74508300 |
| H | 0.05443700  | 5.13205700  | -0.10792400 |
| H | 2.23379000  | 4.23716100  | 0.78615500  |
| H | 2.85743800  | 4.12791300  | -0.85443600 |
| H | 1.00784700  | 2.50101400  | -1.43347100 |
| H | 0.42085800  | 2.59305900  | 0.21654700  |
| H | 2.64131700  | 1.71620100  | 1.04883100  |
| H | 3.22866800  | 1.63998400  | -0.59271100 |
| H | 0.81220300  | -2.07081100 | -0.81225200 |
| H | -2.50936700 | 1.07273600  | -1.20972400 |
| H | -4.21311400 | 1.98857600  | 0.34176800  |
| H | -4.47216100 | -1.82236100 | 2.31568200  |
| H | -2.76634000 | -2.74276900 | 0.77315200  |
| H | -5.94897000 | -0.06550100 | 2.99951000  |
| H | -5.03130800 | 1.44703300  | 3.07500500  |
| H | -6.28157300 | 1.24331000  | 1.84813800  |
| C | 2.78421700  | -0.96808100 | 0.19997600  |
| H | 2.38481200  | -1.63984000 | 0.97072600  |
| H | 2.98504500  | -1.57912600 | -0.69179700 |
| H | 3.73973800  | -0.56962500 | 0.54989100  |
| C | 1.58214900  | 6.59444400  | -0.55715400 |
| H | 1.86958500  | 6.76261800  | 0.49078100  |
| H | 2.51196100  | 6.65098100  | -1.14133200 |
| C | 0.63187700  | 7.70736800  | -1.00767300 |
| H | -0.29765200 | 7.69922500  | -0.42392000 |
| H | 1.08899100  | 8.69730900  | -0.88807100 |
| H | 0.35865600  | 7.59428400  | -2.06467600 |

**2**

E= -1260.655053H

|   |             |             |             |
|---|-------------|-------------|-------------|
| C | -2.80711100 | 0.10406700  | 0.93189700  |
| H | -1.98806100 | -0.28145700 | 1.55422800  |
| H | -3.03303100 | 1.12015800  | 1.28275700  |
| H | -3.69083300 | -0.51635300 | 1.13066300  |
| C | -2.42450300 | 0.10071500  | -0.55315100 |
| H | -2.24625400 | -0.93544700 | -0.88024700 |
| H | -3.27642900 | 0.46155700  | -1.15005200 |

|    |             |             |             |
|----|-------------|-------------|-------------|
| C  | -1.18054700 | 0.95131900  | -0.88880200 |
| H  | -0.35457600 | 0.59282600  | -0.24966000 |
| H  | -1.38115900 | 1.97868600  | -0.53485700 |
| C  | -0.72637900 | 0.99075600  | -2.36187400 |
| H  | -1.59549900 | 1.35706500  | -2.95347700 |
| H  | -0.62203600 | -0.06307300 | -2.70568200 |
| C  | 2.33018000  | 2.28994300  | -4.15441900 |
| H  | 1.94398900  | 3.03424900  | -4.88620600 |
| H  | 2.52780900  | 1.39966200  | -4.79146300 |
| C  | 3.69737600  | 2.81923900  | -3.67604000 |
| H  | 4.15803000  | 2.09925000  | -2.97598300 |
| H  | 3.55715700  | 3.73903400  | -3.08016600 |
| C  | 4.74848900  | 3.13268200  | -4.76302900 |
| H  | 4.33024000  | 3.87619900  | -5.45922400 |
| H  | 4.92177000  | 2.22493300  | -5.36127800 |
| C  | 6.08690400  | 3.64452000  | -4.21683800 |
| H  | 6.55111700  | 2.90786700  | -3.54709200 |
| H  | 6.80506200  | 3.85756800  | -5.01954300 |
| H  | 5.95326100  | 4.57061500  | -3.64123600 |
| Li | 1.53700200  | 1.10577000  | -2.40703700 |
| O  | 2.31186200  | 1.63061100  | -0.59340400 |
| C  | 3.57159200  | 1.17626300  | -0.04445000 |
| C  | 1.97610600  | 2.92946200  | -0.04787700 |
| C  | 4.18038000  | 2.38593000  | 0.66526400  |
| H  | 3.37205300  | 0.35808300  | 0.66027100  |
| H  | 4.18598100  | 0.79064800  | -0.86216100 |
| C  | 2.92863200  | 3.14555400  | 1.12798900  |
| H  | 2.12085900  | 3.68621000  | -0.82916100 |
| H  | 0.92056700  | 2.91751200  | 0.23688500  |
| H  | 4.75675100  | 2.99461500  | -0.04119900 |
| H  | 4.84205600  | 2.09379200  | 1.48644500  |
| H  | 3.11123600  | 4.20650100  | 1.32371300  |
| H  | 2.52154200  | 2.69304000  | 2.04034000  |
| O  | 2.29255400  | -0.80671500 | -2.46285400 |
| C  | 2.64290200  | -1.44815300 | -3.71455300 |
| C  | 1.82357300  | -1.79852900 | -1.51594200 |
| C  | 2.67606400  | -2.94742900 | -3.41876700 |
| H  | 1.87923700  | -1.20183500 | -4.46287100 |
| H  | 3.60289600  | -1.04427400 | -4.04845000 |
| C  | 1.60759900  | -3.07796200 | -2.32347100 |
| H  | 2.59092000  | -1.93514000 | -0.74275300 |
| H  | 0.91313300  | -1.42032900 | -1.04355800 |
| H  | 3.65907900  | -3.24172700 | -3.03191600 |
| H  | 2.46317200  | -3.54951200 | -4.30716400 |
| H  | 1.71869500  | -3.97832900 | -1.71188000 |
| H  | 0.60505900  | -3.08426400 | -2.76708000 |
| O  | -0.76958200 | 2.29450400  | -5.54434600 |
| C  | -2.13864300 | 2.70240100  | -5.77317900 |
| C  | -0.47117600 | 1.10811600  | -6.32151600 |
| C  | -2.60475600 | 1.92149100  | -7.00185000 |
| H  | -2.73746800 | 2.45106400  | -4.88747100 |
| H  | -2.15509200 | 3.78713200  | -5.91273600 |

|    |             |             |             |
|----|-------------|-------------|-------------|
| C  | -1.81248900 | 0.61312000  | -6.86374900 |
| H  | 0.21576100  | 1.38678200  | -7.13079000 |
| H  | 0.03049400  | 0.38720300  | -5.66973500 |
| H  | -2.31926000 | 2.44798800  | -7.92049300 |
| H  | -3.68892000 | 1.77453700  | -7.01252200 |
| H  | -1.70178200 | 0.06918500  | -7.80668400 |
| H  | -2.29682800 | -0.05061100 | -6.13786200 |
| O  | -0.36729200 | 4.45465800  | -3.32659500 |
| C  | 0.38143900  | 5.59422900  | -3.81803400 |
| C  | -1.40192700 | 4.89460400  | -2.41761100 |
| C  | -0.36375800 | 6.83398300  | -3.31629600 |
| H  | 1.39912200  | 5.53830400  | -3.41399500 |
| H  | 0.43424900  | 5.53284200  | -4.90936100 |
| C  | -1.01959700 | 6.32005000  | -2.02577900 |
| H  | -2.37031000 | 4.86767900  | -2.93586900 |
| H  | -1.43363300 | 4.19544100  | -1.57797000 |
| H  | -1.13134300 | 7.13933100  | -4.03735000 |
| H  | 0.30819700  | 7.68189500  | -3.15427300 |
| H  | -1.88451500 | 6.91201500  | -1.71180900 |
| H  | -0.29263900 | 6.30768100  | -1.20501400 |
| Li | 0.14539800  | 2.53467000  | -3.72797600 |

### 3a

E= -1948.554599H

|   |             |             |             |
|---|-------------|-------------|-------------|
| C | -1.61918700 | 5.97786300  | -2.66739200 |
| C | -2.47165700 | 4.71494900  | -2.48878800 |
| C | -1.72807500 | 3.57109700  | -1.78595900 |
| C | -2.59188300 | 2.31791400  | -1.62252600 |
| C | -1.93881700 | 1.12727700  | -0.94978200 |
| N | -0.72349800 | 1.23620800  | -0.54047700 |
| N | -0.17156100 | 0.11043500  | 0.08546700  |
| C | 2.05654600  | 0.21913000  | -1.57866400 |
| C | 2.28019200  | 1.41336200  | -2.26856500 |
| C | 2.70533200  | 1.37276800  | -3.59571200 |
| C | 2.91355800  | 0.15184300  | -4.25568600 |
| C | 2.68416600  | -1.03377800 | -3.54298300 |
| C | 2.25598400  | -1.00706800 | -2.21543200 |
| C | 3.35849600  | 0.12195700  | -5.69797000 |
| S | 1.46459900  | 0.25511800  | 0.12929500  |
| O | 1.97481900  | 1.53139600  | 0.69429400  |
| O | 1.93674500  | -1.00106100 | 0.76902400  |
| H | -1.27281800 | 6.32494800  | -1.68231900 |
| H | -0.71212200 | 5.72560400  | -3.23690900 |
| H | -2.82040700 | 4.37229400  | -3.47482400 |
| H | -3.37756700 | 4.96868400  | -1.91731100 |
| H | -1.37886300 | 3.90767100  | -0.80090400 |
| H | -0.82397700 | 3.31568400  | -2.35373200 |
| H | -2.95324100 | 1.99079900  | -2.61133100 |
| H | -3.50774700 | 2.57275500  | -1.06337500 |
| H | 2.13927700  | 2.36229500  | -1.76257200 |
| H | 2.88543200  | 2.30520800  | -4.12649800 |

|    |             |             |             |
|----|-------------|-------------|-------------|
| H  | 2.84871100  | -1.99139200 | -4.03172600 |
| H  | 2.09324700  | -1.93145300 | -1.67053400 |
| H  | 3.71207100  | -0.87279000 | -5.98828800 |
| H  | 2.53384000  | 0.38881000  | -6.37263400 |
| H  | 4.16740900  | 0.83840700  | -5.88290600 |
| O  | -0.91298500 | -2.74915500 | 1.82465500  |
| O  | 0.37990300  | -0.31667700 | 3.58533000  |
| C  | -0.51023000 | -3.48338900 | 0.64970200  |
| C  | -1.25686400 | -4.82660900 | 0.73804200  |
| C  | -1.61032200 | -4.96166200 | 2.24545800  |
| C  | -0.96317700 | -3.72250000 | 2.88140200  |
| C  | 0.64454700  | 1.07751500  | 3.89429000  |
| C  | 2.10603800  | 1.13856800  | 4.33489400  |
| C  | 2.31310700  | -0.24557100 | 4.96644500  |
| C  | 1.48155500  | -1.14141300 | 4.04899900  |
| H  | -0.76690600 | -2.87568900 | -0.21885800 |
| H  | 0.57788600  | -3.62207100 | 0.67391700  |
| H  | -0.62893700 | -5.64826500 | 0.38125200  |
| H  | -2.16408300 | -4.81117800 | 0.12692900  |
| H  | -2.69483100 | -4.94436500 | 2.39157800  |
| H  | -1.22724000 | -5.88477200 | 2.69007800  |
| H  | 0.05839600  | -3.94027100 | 3.22455400  |
| H  | -1.53181700 | -3.29287800 | 3.70841300  |
| H  | 0.44595400  | 1.67045400  | 2.99842900  |
| H  | -0.03590000 | 1.38962700  | 4.69737700  |
| H  | 2.29469400  | 1.96462700  | 5.02751500  |
| H  | 2.75096300  | 1.26287900  | 3.45915100  |
| H  | 3.36283100  | -0.55295700 | 4.99913500  |
| H  | 1.91732400  | -0.26522300 | 5.98920100  |
| H  | 1.06146700  | -2.01263600 | 4.56118400  |
| H  | 2.04963300  | -1.47009400 | 3.17379700  |
| C  | -2.35617700 | 7.12244900  | -3.37480700 |
| H  | -3.26287400 | 7.37571600  | -2.80633000 |
| H  | -2.70072200 | 6.77691300  | -4.36030500 |
| C  | -1.49893000 | 8.37956700  | -3.54836900 |
| H  | -0.60278500 | 8.17123000  | -4.14701800 |
| H  | -2.05595800 | 9.17866700  | -4.05288500 |
| H  | -1.16401200 | 8.76978600  | -2.57865200 |
| C  | -2.76869100 | -0.12975900 | -0.82841500 |
| H  | -2.22220800 | -0.98794700 | -1.24051500 |
| H  | -2.98872700 | -0.36905400 | 0.21898600  |
| H  | -3.71794900 | -0.03050400 | -1.36579900 |
| Li | -0.66618000 | -0.75955100 | 1.91653500  |
| O  | -2.47333100 | -0.06010300 | 2.58157500  |
| C  | -3.18608300 | -0.78275800 | 3.61619300  |
| C  | -2.85182500 | 1.34023600  | 2.61046400  |
| C  | -4.25582800 | 0.17715600  | 4.13748800  |
| H  | -3.59614300 | -1.69690000 | 3.17706500  |
| H  | -2.47267400 | -1.05467900 | 4.40387800  |
| C  | -3.58386500 | 1.54315500  | 3.93565600  |
| H  | -1.94693200 | 1.94344700  | 2.50461000  |
| H  | -3.51014200 | 1.54181400  | 1.75618600  |

|   |             |             |            |
|---|-------------|-------------|------------|
| H | -4.52179400 | -0.02814600 | 5.17863100 |
| H | -5.16504300 | 0.10557800  | 3.52925000 |
| H | -2.87044600 | 1.74261100  | 4.74401000 |
| H | -4.29414100 | 2.37410600  | 3.89193500 |

#### 4a

E= -1715.530965 H

|    |             |             |             |
|----|-------------|-------------|-------------|
| C  | -1.93573000 | 5.95205200  | -0.97001800 |
| C  | -2.43183800 | 4.55731300  | -1.37359500 |
| C  | -1.58013000 | 3.41322100  | -0.80636800 |
| C  | -2.08078200 | 2.02953000  | -1.23552900 |
| C  | -1.31423600 | 0.81277900  | -0.71718500 |
| C  | -1.95628800 | -0.47443100 | -0.83061600 |
| N  | -0.14467800 | 1.06472600  | -0.17271500 |
| N  | 0.46496700  | -0.13880900 | 0.32317400  |
| C  | 3.08739100  | 0.62348900  | -0.12689200 |
| C  | 3.08322900  | 1.91855400  | -0.66030700 |
| C  | 4.00255800  | 2.26509200  | -1.64820000 |
| C  | 4.94761300  | 1.34039300  | -2.12204900 |
| C  | 4.94060700  | 0.05209400  | -1.57150200 |
| C  | 4.01791500  | -0.30934900 | -0.58688200 |
| C  | 5.94079900  | 1.73240300  | -3.19038400 |
| S  | 1.84145200  | 0.14703000  | 1.10298700  |
| O  | 1.83574000  | 1.28500300  | 2.06632500  |
| O  | 2.29657200  | -1.16425100 | 1.65183400  |
| H  | -1.91641100 | 6.02796400  | 0.12770400  |
| H  | -0.89345800 | 6.07565400  | -1.30075100 |
| H  | -2.45160300 | 4.48692500  | -2.47220700 |
| H  | -3.47529000 | 4.43577500  | -1.04406600 |
| H  | -1.56474400 | 3.47375100  | 0.29056200  |
| H  | -0.53841200 | 3.53840800  | -1.12692900 |
| H  | -2.09882200 | 1.98312100  | -2.33708600 |
| H  | -3.13331100 | 1.91763000  | -0.93169800 |
| H  | -1.28318600 | -1.29180900 | -1.11905400 |
| H  | 2.36873600  | 2.64765700  | -0.29507400 |
| H  | 3.99089500  | 3.27413900  | -2.05621300 |
| H  | 5.66826200  | -0.68025000 | -1.91551400 |
| H  | 4.02155000  | -1.30941600 | -0.16551600 |
| H  | 6.61635200  | 0.90510200  | -3.43190600 |
| H  | 5.43511600  | 2.03187900  | -4.11758000 |
| H  | 6.55595400  | 2.58533700  | -2.87525900 |
| Li | -1.01250500 | -1.35719900 | 0.97912100  |
| O  | -0.78561100 | -3.34905900 | 0.90332500  |
| O  | -1.59335500 | -1.05212800 | 2.86639400  |
| C  | 0.52567700  | -3.90984800 | 0.69096700  |
| C  | 0.51030900  | -4.34278800 | -0.77335400 |
| C  | -0.94417900 | -4.83035300 | -0.97694400 |
| C  | -1.72541600 | -4.18096100 | 0.19081200  |
| C  | -1.86802900 | 0.32766500  | 3.22890800  |
| C  | -0.96571700 | 0.63279300  | 4.42460400  |
| C  | -0.84631800 | -0.74199500 | 5.09863500  |

|   |             |             |             |
|---|-------------|-------------|-------------|
| C | -0.77899600 | -1.67766800 | 3.89235800  |
| H | 1.25252600  | -3.13230200 | 0.93494200  |
| H | 0.66425800  | -4.77172000 | 1.36243600  |
| H | 1.25287400  | -5.11766500 | -0.98825700 |
| H | 0.72162500  | -3.47866800 | -1.41157500 |
| H | -1.34030400 | -4.52448700 | -1.94932200 |
| H | -1.00934000 | -5.92167300 | -0.91968100 |
| H | -2.12391300 | -4.93921300 | 0.87836400  |
| H | -2.54581100 | -3.53473900 | -0.13131400 |
| H | -1.66264600 | 0.95811300  | 2.35983600  |
| H | -2.93252700 | 0.40768800  | 3.48620600  |
| H | -1.39017600 | 1.40167700  | 5.07788600  |
| H | 0.01352400  | 0.97187900  | 4.07086300  |
| H | 0.03454400  | -0.83420000 | 5.74150300  |
| H | -1.73770000 | -0.95640200 | 5.70128300  |
| H | -1.18494300 | -2.67515700 | 4.08611700  |
| H | 0.24556400  | -1.77397200 | 3.51349700  |
| C | -2.78335300 | 7.09717000  | -1.53959700 |
| H | -3.82328500 | 6.98174500  | -1.20117200 |
| H | -2.80923300 | 7.01793400  | -2.63628300 |
| C | -2.27219500 | 8.48540700  | -1.14388900 |
| H | -1.24713100 | 8.64872700  | -1.50098900 |
| H | -2.90035000 | 9.28037700  | -1.56484000 |
| H | -2.26470500 | 8.61106800  | -0.05342700 |
| H | -2.85478900 | -0.47590700 | -1.45661700 |

#### TS (4-5)a

E= -1715.510142 H

|    |             |             |             |
|----|-------------|-------------|-------------|
| C  | -1.63148600 | 2.33899100  | -6.06451400 |
| C  | -2.48253800 | 1.34608700  | -5.26156500 |
| C  | -2.06346700 | 1.22633600  | -3.79073700 |
| C  | -2.92109200 | 0.23226600  | -2.98437700 |
| C  | -2.46737600 | 0.05832100  | -1.54131500 |
| C  | -3.08554300 | 0.74707100  | -0.53583600 |
| N  | -1.35432600 | -0.75790000 | -1.43170500 |
| N  | -1.02192900 | -1.22057800 | -0.22455500 |
| Li | 0.03807400  | -2.67392700 | 0.56238300  |
| H  | -1.69599900 | 3.33344500  | -5.59732100 |
| H  | -0.57366600 | 2.04220100  | -6.00258600 |
| H  | -2.42449600 | 0.35443000  | -5.73577600 |
| H  | -3.53992800 | 1.64805800  | -5.31711000 |
| H  | -2.11752700 | 2.21465600  | -3.31111200 |
| H  | -1.01403600 | 0.90909600  | -3.72898400 |
| H  | -2.87840300 | -0.74653900 | -3.48553300 |
| H  | -3.96922500 | 0.56062600  | -3.00732600 |
| H  | -2.73855200 | 0.68054800  | 0.49030400  |
| C  | 1.30924800  | 0.85706400  | 0.17105100  |
| C  | 0.90868300  | 1.98772500  | -0.54618700 |
| C  | 1.84862600  | 2.71187900  | -1.28287700 |
| C  | 3.19539300  | 2.32573300  | -1.32077200 |
| C  | 3.57566800  | 1.17910000  | -0.60324600 |

|   |             |             |             |
|---|-------------|-------------|-------------|
| C | 2.64355100  | 0.44182400  | 0.12589600  |
| C | 4.21588900  | 3.11546900  | -2.10626100 |
| S | 0.02587100  | -0.11601900 | 1.03244800  |
| O | -0.54780200 | 0.83148900  | 2.06058400  |
| O | 0.80047900  | -1.27678700 | 1.68689800  |
| H | -0.13023700 | 2.30860900  | -0.51894600 |
| H | 1.53042800  | 3.59301500  | -1.83651100 |
| H | 4.61769500  | 0.86322100  | -0.61542900 |
| H | 2.94128700  | -0.44637800 | 0.67550900  |
| H | 4.98661900  | 3.54057600  | -1.44958500 |
| H | 4.73515000  | 2.48506900  | -2.83932500 |
| H | 3.74866600  | 3.94358500  | -2.64935700 |
| O | 1.08045700  | -3.85231000 | -0.67825100 |
| C | 1.93082900  | -3.09395300 | -1.58609700 |
| C | 1.61388600  | -3.59878400 | -2.99856300 |
| C | 0.18572500  | -4.14335800 | -2.84271000 |
| C | 0.24442300  | -4.75179100 | -1.44649800 |
| H | 1.68090400  | -2.03575500 | -1.46751400 |
| H | 2.97476000  | -3.25053900 | -1.29402700 |
| H | 2.30073100  | -4.40406100 | -3.28579900 |
| H | 1.69193800  | -2.80082500 | -3.74245900 |
| H | -0.54066500 | -3.32282300 | -2.86296200 |
| H | -0.08509500 | -4.87682600 | -3.60873200 |
| H | 0.70772200  | -5.74894400 | -1.45901500 |
| H | -0.72112000 | -4.81929700 | -0.93955400 |
| O | -1.01244800 | -4.01953600 | 1.63003100  |
| C | -2.33294600 | -3.57167100 | 2.03336200  |
| C | -2.27698000 | -3.48488700 | 3.55469300  |
| C | -1.35370000 | -4.66273600 | 3.90359200  |
| C | -0.33688400 | -4.63457400 | 2.75680100  |
| H | -2.51757400 | -2.61945500 | 1.52830400  |
| H | -3.07405400 | -4.31125500 | 1.69892100  |
| H | -3.26715700 | -3.56066000 | 4.01437800  |
| H | -1.82369200 | -2.53552900 | 3.86202900  |
| H | -0.87272800 | -4.56275500 | 4.88122700  |
| H | -1.91692500 | -5.60353600 | 3.89456700  |
| H | 0.00498500  | -5.63110200 | 2.45690600  |
| H | 0.53909000  | -4.02320900 | 3.00535100  |
| H | -3.93399800 | 1.39678800  | -0.74092100 |
| C | -2.03816800 | 2.44836600  | -7.53991100 |
| H | -3.09538900 | 2.74435000  | -7.60410000 |
| H | -1.97066000 | 1.45574300  | -8.00855100 |
| C | -1.18440800 | 3.44235200  | -8.33293100 |
| H | -0.12404200 | 3.15885500  | -8.31581000 |
| H | -1.49727800 | 3.49149700  | -9.38334000 |
| H | -1.26150900 | 4.45496900  | -7.91618200 |

### 5a

E= -1128.318321 H

|   |             |            |             |
|---|-------------|------------|-------------|
| C | -2.22439900 | 4.08525700 | -3.45197900 |
| C | -2.36892200 | 2.61848500 | -3.87803200 |

|    |             |             |             |
|----|-------------|-------------|-------------|
| C  | -2.58988500 | 1.66036000  | -2.70109700 |
| C  | -2.72381400 | 0.18620900  | -3.13148400 |
| C  | -2.87193000 | -0.75394200 | -1.96453200 |
| N  | -1.61227500 | -0.96724600 | -1.21643600 |
| N  | -1.65780300 | -1.11522600 | 0.02014800  |
| H  | -3.12425100 | 4.39328300  | -2.89857300 |
| H  | -1.38658400 | 4.17559100  | -2.74413700 |
| H  | -1.46855300 | 2.31107900  | -4.43107000 |
| H  | -3.20705500 | 2.52671000  | -4.58523800 |
| H  | -3.49374000 | 1.95515100  | -2.14943100 |
| H  | -1.75412400 | 1.75162700  | -1.99333200 |
| H  | -1.82009900 | -0.09653500 | -3.69171900 |
| H  | -3.57387200 | 0.07855400  | -3.81753900 |
| Li | 0.17204000  | -1.54728600 | 0.68456400  |
| O  | 0.82872700  | -3.35845400 | 0.05786400  |
| O  | 0.03888600  | -1.80552400 | 2.66310200  |
| C  | 1.59974200  | -3.68164000 | -1.11331100 |
| C  | 0.56459400  | -4.07242000 | -2.17240400 |
| C  | -0.60307100 | -4.66222000 | -1.33670300 |
| C  | -0.21002300 | -4.35904600 | 0.12364200  |
| C  | -1.22940600 | -1.80122100 | 3.35000600  |
| C  | -1.01082100 | -0.86648600 | 4.53397500  |
| C  | 0.42669700  | -1.22341600 | 4.95712600  |
| C  | 1.10045000  | -1.64004900 | 3.63275600  |
| H  | 2.20208600  | -2.80749200 | -1.36854500 |
| H  | 2.27293800  | -4.51951600 | -0.87849300 |
| H  | 0.97328300  | -4.78343300 | -2.89673000 |
| H  | 0.23158800  | -3.18284100 | -2.71528700 |
| H  | -1.54860100 | -4.17846900 | -1.59535700 |
| H  | -0.72068500 | -5.73886400 | -1.49179500 |
| H  | 0.18989300  | -5.25031700 | 0.62678900  |
| H  | -1.02320800 | -3.94986400 | 0.72633400  |
| H  | -1.98352700 | -1.47234800 | 2.63199200  |
| H  | -1.47062100 | -2.82098100 | 3.68598400  |
| H  | -1.74228400 | -1.01901300 | 5.33323000  |
| H  | -1.07410300 | 0.17654700  | 4.20272200  |
| H  | 0.94736800  | -0.39052900 | 5.43854100  |
| H  | 0.41735100  | -2.06308000 | 5.66043200  |
| H  | 1.65261200  | -2.58273100 | 3.72808100  |
| H  | 1.78210900  | -0.87937000 | 3.24042900  |
| C  | -3.97183100 | -1.45994000 | -1.68112300 |
| H  | -3.98544800 | -2.12350600 | -0.81747400 |
| H  | -4.87702100 | -1.39973000 | -2.28165600 |
| C  | -1.99947200 | 5.04905100  | -4.62414000 |
| H  | -2.83861800 | 4.96477500  | -5.32974300 |
| H  | -1.10193400 | 4.74118500  | -5.17995300 |
| C  | -1.84937700 | 6.50933500  | -4.18813200 |
| H  | -0.99488500 | 6.63784400  | -3.51120500 |
| H  | -1.69130500 | 7.16994900  | -5.04939700 |
| H  | -2.74480700 | 6.86150800  | -3.65993600 |
| O  | 1.53256100  | -0.10081200 | 0.49035200  |
| C  | 2.51777700  | 0.04325200  | -0.56701400 |

|   |            |             |             |
|---|------------|-------------|-------------|
| C | 1.10616500 | 1.20901800  | 0.93512700  |
| C | 2.72036400 | 1.55129400  | -0.76744300 |
| H | 3.43478400 | -0.45768200 | -0.23596100 |
| H | 2.14647000 | -0.45497800 | -1.46803100 |
| C | 2.25967200 | 2.13828900  | 0.57554500  |
| H | 0.18221300 | 1.48747300  | 0.41122500  |
| H | 0.89885900 | 1.14532800  | 2.00641700  |
| H | 2.08108700 | 1.91752700  | -1.57829300 |
| H | 3.75742100 | 1.79609300  | -1.01469600 |
| H | 1.94684500 | 3.18422600  | 0.50474900  |
| H | 3.05544000 | 2.06304300  | 1.32652700  |

### TS (5-6)a

E= -1128.310118 H

|    |             |             |             |
|----|-------------|-------------|-------------|
| C  | -3.86885800 | -4.86777800 | -0.08487000 |
| O  | -3.22280300 | -3.57127800 | 0.02035300  |
| C  | -2.66446400 | -3.40142300 | 1.35243800  |
| C  | -2.70767100 | -4.78654600 | 1.99313200  |
| C  | -3.95728600 | -5.40041600 | 1.34461700  |
| Li | -2.45007900 | -2.60560300 | -1.49687600 |
| N  | -0.39666000 | -2.66226200 | -1.46705400 |
| N  | 0.30721300  | -2.55413800 | -0.54852600 |
| C  | 2.30871100  | -2.72667800 | -1.09270400 |
| C  | 3.42461500  | -2.62138000 | -0.09980400 |
| C  | 4.64984300  | -1.08374000 | 1.56415300  |
| C  | 4.79428000  | 0.33006700  | 2.14310700  |
| C  | 5.88091600  | 0.44502700  | 3.22000700  |
| C  | 6.02146300  | 1.85779700  | 3.79445600  |
| C  | 2.40298400  | -2.97698500 | -2.38744300 |
| H  | -4.84208000 | -4.72722600 | -0.56430500 |
| H  | -3.25181300 | -5.51647300 | -0.71875200 |
| H  | -1.65490100 | -2.99453500 | 1.24948900  |
| H  | -3.28783000 | -2.68310700 | 1.90002300  |
| H  | -2.76564900 | -4.73450500 | 3.08431800  |
| H  | -1.81368100 | -5.36022400 | 1.72195400  |
| H  | -3.97052100 | -6.49379800 | 1.37618300  |
| H  | -4.86467600 | -5.02986700 | 1.83583000  |
| H  | 4.40516600  | -2.91554400 | -0.52684800 |
| H  | 3.24203900  | -3.31834900 | 0.73629100  |
| H  | 5.61360600  | -1.39945400 | 1.13683000  |
| H  | 4.43426200  | -1.78895200 | 2.38126800  |
| H  | 3.83031800  | 0.64977000  | 2.56706600  |
| H  | 5.01692800  | 1.03548300  | 1.32824800  |
| H  | 6.84477400  | 0.12662400  | 2.79733100  |
| H  | 5.65849600  | -0.25894600 | 4.03506900  |
| H  | 6.80394400  | 1.90133000  | 4.56200600  |
| H  | 5.08471100  | 2.19561700  | 4.25637400  |
| H  | 6.28362400  | 2.58196100  | 3.01235300  |
| H  | 3.32668800  | -3.15666400 | -2.95429600 |
| H  | 1.47366100  | -3.01973900 | -2.98496300 |
| O  | -3.11492600 | -3.38916400 | -3.17680700 |

|   |             |             |             |
|---|-------------|-------------|-------------|
| C | -3.80372600 | -2.57760400 | -4.16089600 |
| C | -3.04288800 | -2.79927400 | -5.46327300 |
| C | -2.64401900 | -4.27801800 | -5.34309200 |
| C | -2.33467300 | -4.41944300 | -3.84963600 |
| H | -4.84480900 | -2.91946500 | -4.23883500 |
| H | -3.79271500 | -1.54577800 | -3.80178800 |
| H | -2.15209700 | -2.16099500 | -5.49549000 |
| H | -3.65485500 | -2.58605500 | -6.34470000 |
| H | -3.48478700 | -4.92204100 | -5.62550600 |
| H | -1.78481800 | -4.54565700 | -5.96464000 |
| H | -1.27830700 | -4.23475900 | -3.62758700 |
| H | -2.62012600 | -5.39357200 | -3.44032000 |
| C | 3.55730100  | -1.20304900 | 0.49427300  |
| H | 3.76398300  | -0.49511800 | -0.32153500 |
| H | 2.59027100  | -0.90222100 | 0.92146500  |
| C | -4.22476200 | -0.22614100 | -0.86526900 |
| O | -2.98175200 | -0.72071900 | -1.42563900 |
| C | -2.04045500 | 0.37479600  | -1.59797100 |
| C | -2.85019400 | 1.64996800  | -1.36759200 |
| C | -3.91271200 | 1.18134700  | -0.36191100 |
| H | -4.98632700 | -0.21312500 | -1.65600000 |
| H | -4.54294500 | -0.91941700 | -0.08195300 |
| H | -1.23784000 | 0.26108100  | -0.86095700 |
| H | -1.60966600 | 0.30049300  | -2.60062200 |
| H | -2.22908400 | 2.46825400  | -0.99229700 |
| H | -3.32492500 | 1.97795900  | -2.29976000 |
| H | -3.49121600 | 1.14044400  | 0.64925300  |
| H | -4.80104200 | 1.81919900  | -0.33924600 |

### 6a

E= -1018.824106 H

|    |             |             |             |
|----|-------------|-------------|-------------|
| C  | -2.12017000 | 4.45816100  | -3.03500400 |
| C  | -2.24741300 | 2.99788100  | -3.48838900 |
| C  | -2.13162400 | 1.98204100  | -2.34347000 |
| C  | -2.27349000 | 0.51526100  | -2.79331900 |
| C  | -2.16157400 | -0.48820700 | -1.64819700 |
| H  | -2.88378000 | 4.66771800  | -2.27060500 |
| H  | -1.14766100 | 4.60332600  | -2.54029900 |
| H  | -1.47506900 | 2.78411100  | -4.24323700 |
| H  | -3.21371300 | 2.86203900  | -3.99721100 |
| H  | -2.90456600 | 2.19778900  | -1.58992400 |
| H  | -1.16555600 | 2.11356500  | -1.83339000 |
| H  | -1.48328100 | 0.32340200  | -3.54029700 |
| H  | -3.23494700 | 0.42283700  | -3.34240700 |
| Li | -0.54784600 | -1.18399200 | -0.38571000 |
| O  | 0.18579800  | -3.03543300 | -0.88398500 |
| O  | -1.06082400 | -1.46246400 | 1.55877000  |
| C  | 0.34134400  | -3.31112700 | -2.29237000 |
| C  | -0.71197900 | -4.36851300 | -2.59844300 |
| C  | -0.65545700 | -5.23942200 | -1.33181600 |
| C  | -0.31841300 | -4.22574800 | -0.22312200 |

|   |             |             |             |
|---|-------------|-------------|-------------|
| C | -2.30825500 | -1.05075700 | 2.15850500  |
| C | -1.89878400 | -0.31331100 | 3.42768600  |
| C | -0.71207900 | -1.16379900 | 3.91223800  |
| C | -0.07206500 | -1.65449300 | 2.60085800  |
| H | 0.20103300  | -2.37006300 | -2.83022000 |
| H | 1.35734600  | -3.68686400 | -2.48379800 |
| H | -0.49705900 | -4.92708100 | -3.51465900 |
| H | -1.69250300 | -3.89028900 | -2.69844600 |
| H | -1.59354400 | -5.76608000 | -1.13341000 |
| H | 0.13922600  | -5.98865400 | -1.42086900 |
| H | 0.44764500  | -4.60113800 | 0.46551500  |
| H | -1.19452000 | -3.92783400 | 0.35951500  |
| H | -2.83797200 | -0.44291300 | 1.42322900  |
| H | -2.91486900 | -1.93842800 | 2.39052400  |
| H | -2.71060500 | -0.25218200 | 4.15878700  |
| H | -1.57659000 | 0.70562600  | 3.18236300  |
| H | -0.00469800 | -0.60260100 | 4.52973600  |
| H | -1.07352500 | -2.01310600 | 4.50230300  |
| H | 0.20365100  | -2.71457500 | 2.64310000  |
| H | 0.81266200  | -1.07686900 | 2.31837700  |
| C | -3.28042300 | -1.21820800 | -1.43599600 |
| H | -3.35903900 | -1.96762400 | -0.63953400 |
| H | -4.20568500 | -1.12532400 | -2.03655800 |
| C | -2.26179600 | 5.47309100  | -4.17689700 |
| H | -3.23271700 | 5.32644600  | -4.67187700 |
| H | -1.49692800 | 5.26997000  | -4.94052800 |
| C | -2.14271600 | 6.92769100  | -3.71345600 |
| H | -1.16716000 | 7.11885900  | -3.24786800 |
| H | -2.25225400 | 7.62678400  | -4.55167900 |
| H | -2.91525800 | 7.17366100  | -2.97348100 |
| O | 1.21920400  | -0.20360800 | -0.17877600 |
| C | 2.55402900  | -0.72692100 | -0.38658100 |
| C | 1.28775600  | 1.18319400  | 0.22571900  |
| C | 3.50140200  | 0.46893000  | -0.25208700 |
| H | 2.74965300  | -1.48920600 | 0.37732600  |
| H | 2.59554500  | -1.20202000 | -1.37095900 |
| C | 2.72554100  | 1.39885400  | 0.69242600  |
| H | 1.04472300  | 1.82087100  | -0.63430100 |
| H | 0.53656200  | 1.34643100  | 1.00378000  |
| H | 3.64783500  | 0.95307000  | -1.22453900 |
| H | 4.48220000  | 0.17606600  | 0.13434400  |
| H | 3.03353400  | 2.44614400  | 0.62025600  |
| H | 2.84392900  | 1.07603500  | 1.73383900  |

### 1b

E= -1244.130748H

|   |            |            |             |
|---|------------|------------|-------------|
| C | 5.91016100 | 3.34796200 | 0.08717500  |
| C | 4.38369500 | 3.21077200 | 0.02252300  |
| C | 3.90600600 | 1.75271800 | -0.00501900 |
| C | 2.37752700 | 1.64347500 | -0.09458700 |
| C | 1.79885800 | 0.24120200 | -0.11447600 |

|   |             |             |             |
|---|-------------|-------------|-------------|
| N | 0.56698500  | -0.01218800 | -0.38643600 |
| N | -0.25184800 | 1.07158100  | -0.71261700 |
| C | -2.16536300 | -0.35876200 | -2.02015100 |
| C | -2.10609600 | -1.74641800 | -1.86688200 |
| C | -2.29992700 | -2.55589800 | -2.98267700 |
| C | -2.55472400 | -2.00240000 | -4.24809500 |
| C | -2.61281800 | -0.60651000 | -4.36816600 |
| C | -2.41805900 | 0.22176600  | -3.26389000 |
| C | -2.76345000 | -2.89716600 | -5.44437000 |
| S | -1.92093900 | 0.69419200  | -0.60076000 |
| O | -2.22956300 | -0.08095200 | 0.60826700  |
| O | -2.57062200 | 1.99478600  | -0.81948700 |
| H | 6.28637800  | 2.81730200  | 0.97464300  |
| H | 6.35715200  | 2.84359700  | -0.78258200 |
| H | 4.00996000  | 3.73310700  | -0.87062400 |
| H | 3.93498200  | 3.72277100  | 0.88680400  |
| H | 4.26580200  | 1.23819500  | 0.89528600  |
| H | 4.36097100  | 1.23861000  | -0.86223600 |
| H | 2.02947400  | 2.16914200  | -0.99620000 |
| H | 1.92965300  | 2.18886900  | 0.75331500  |
| H | -0.08575500 | 1.94709500  | -0.20527300 |
| H | -1.91689400 | -2.18079200 | -0.89153300 |
| H | -2.25563600 | -3.63623600 | -2.86938800 |
| H | -2.81520000 | -0.16000600 | -5.33809400 |
| H | -2.47051500 | 1.30063900  | -3.36665400 |
| H | -2.95475800 | -2.31597300 | -6.35148900 |
| H | -1.88338200 | -3.52711200 | -5.62414300 |
| H | -3.61395300 | -3.57239900 | -5.28850800 |
| C | 2.65930400  | -0.94887900 | 0.21136500  |
| H | 2.07083800  | -1.86719100 | 0.14047800  |
| H | 3.51539900  | -1.02250500 | -0.47015200 |
| H | 3.06623200  | -0.87005700 | 1.22768200  |
| C | 6.39237500  | 4.80385400  | 0.12867700  |
| H | 6.00684300  | 5.33871100  | -0.75125400 |
| H | 5.95708600  | 5.30459800  | 1.00547500  |
| C | 7.91728600  | 4.93514300  | 0.17449100  |
| H | 8.38382600  | 4.48190100  | -0.70967600 |
| H | 8.22733700  | 5.98668600  | 0.20950800  |
| H | 8.33371600  | 4.43698600  | 1.05950000  |

### 3b

E= -1948.552055 H

|   |             |             |             |
|---|-------------|-------------|-------------|
| C | -2.46594900 | 1.87840400  | -1.98104500 |
| C | -1.72280700 | 0.78197300  | -1.25563900 |
| N | -0.46503500 | 0.98745300  | -1.05135100 |
| N | 0.24443200  | 0.01353300  | -0.33461300 |
| C | 2.06944300  | -0.33817100 | -2.39881300 |
| C | 1.97037500  | 0.62087100  | -3.41164100 |
| C | 2.09658000  | 0.23062600  | -4.74327400 |
| C | 2.32367500  | -1.11079800 | -5.09055000 |
| C | 2.42489400  | -2.05350300 | -4.05847600 |



|   |             |             |             |
|---|-------------|-------------|-------------|
| C | 2.29522900  | -1.67694200 | -2.72040500 |
| C | 2.45734900  | -1.51727900 | -6.53834000 |
| S | 1.84693900  | 0.14595100  | -0.67094700 |
| O | 2.40556500  | 1.51956600  | -0.57651200 |
| O | 2.49689800  | -0.90688800 | 0.15202500  |
| H | -2.86983200 | 1.53221300  | -2.94173300 |
| H | -3.32152700 | 2.24349400  | -1.39494300 |
| H | 1.80841300  | 1.66239900  | -3.15545700 |
| H | 2.02206900  | 0.98097400  | -5.52774600 |
| H | 2.61002600  | -3.09683000 | -4.30380100 |
| H | 2.38106700  | -2.41371200 | -1.92821100 |
| H | 2.66108900  | -2.58837900 | -6.63618600 |
| H | 1.54066300  | -1.29784100 | -7.10092300 |
| H | 3.27189500  | -0.97329600 | -7.03297800 |
| O | -0.02173400 | -2.17137600 | 2.30036300  |
| O | 1.47157000  | 0.62190100  | 2.94659100  |
| C | 0.20209800  | -3.27378400 | 1.39894300  |
| C | -0.54544200 | -4.45582800 | 2.03443000  |
| C | -0.58131100 | -4.10338000 | 3.54803000  |
| C | 0.10469100  | -2.72723900 | 3.62080400  |
| C | 1.73934400  | 2.04351500  | 2.83719800  |
| C | 3.25937200  | 2.17752200  | 2.83306500  |
| C | 3.68436100  | 1.01575800  | 3.74319400  |
| C | 2.67516300  | -0.07354200 | 3.37337500  |
| H | -0.16559800 | -2.97565000 | 0.41638600  |
| H | 1.28045600  | -3.46753200 | 1.33025900  |
| H | -0.03531000 | -5.40261600 | 1.83454700  |
| H | -1.56002500 | -4.53054000 | 1.63128300  |
| H | -1.61234300 | -4.04444300 | 3.90963200  |
| H | -0.05434100 | -4.83852900 | 4.16318000  |
| H | 1.17028500  | -2.82896700 | 3.86951000  |
| H | -0.35669800 | -2.03008500 | 4.32340000  |
| H | 1.27212800  | 2.40714400  | 1.91937300  |
| H | 1.29077200  | 2.55393600  | 3.70029000  |
| H | 3.58970500  | 3.15595900  | 3.19567600  |
| H | 3.63662900  | 2.03187300  | 1.81618300  |
| H | 4.71562700  | 0.69072500  | 3.57515800  |
| H | 3.58258600  | 1.29730900  | 4.79833000  |
| H | 2.41549300  | -0.72188700 | 4.21618700  |
| H | 3.02084600  | -0.68414200 | 2.53476600  |
| C | -3.55629200 | -0.94859600 | -1.79846200 |
| H | -4.31010400 | -0.16876900 | -1.97077600 |
| H | -3.08866500 | -1.14741000 | -2.77335700 |
| C | -4.26059100 | -2.22101700 | -1.30767100 |
| H | -3.50990800 | -3.00446300 | -1.12517400 |
| H | -4.73391400 | -2.01918300 | -0.33465900 |
| C | -5.31729100 | -2.75162200 | -2.28485300 |
| H | -6.06301700 | -1.96548900 | -2.47692100 |
| H | -4.84134700 | -2.96309400 | -3.25402100 |
| C | -6.03386900 | -4.01469800 | -1.78935200 |
| H | -5.28959600 | -4.79965400 | -1.59189400 |
| H | -6.51682700 | -3.80244300 | -0.82449600 |

|    |             |             |             |
|----|-------------|-------------|-------------|
| C  | -7.07934100 | -4.54406400 | -2.77474800 |
| H  | -6.62318700 | -4.80102600 | -3.73939700 |
| H  | -7.57165000 | -5.44586600 | -2.39068300 |
| H  | -7.86007700 | -3.79703300 | -2.96769700 |
| H  | -1.79385800 | 2.71972500  | -2.17416300 |
| C  | -2.48820100 | -0.44856700 | -0.81025400 |
| H  | -2.96591000 | -0.23714800 | 0.15856400  |
| H  | -1.76171300 | -1.24615100 | -0.61880000 |
| Li | 0.12989100  | -0.26348400 | 1.72287600  |
| O  | -1.59356800 | 0.59521600  | 2.38874100  |
| C  | -1.86658400 | 2.00787700  | 2.34022700  |
| C  | -2.39910700 | 0.07696800  | 3.46208500  |
| C  | -3.37795500 | 2.13171000  | 2.58709500  |
| H  | -1.29540000 | 2.51761500  | 3.12909100  |
| H  | -1.53675200 | 2.37404900  | 1.36649100  |
| C  | -3.73005500 | 0.84815300  | 3.38876200  |
| H  | -2.49821700 | -0.99893700 | 3.30738100  |
| H  | -1.88879900 | 0.25648500  | 4.41960700  |
| H  | -3.92290200 | 2.15654100  | 1.63890600  |
| H  | -3.61705700 | 3.04881400  | 3.13331900  |
| H  | -4.49182000 | 0.26108700  | 2.86767000  |
| H  | -4.11009100 | 1.07173500  | 4.38977500  |

#### 4b

E= -1715.526146 H

|    |             |             |             |
|----|-------------|-------------|-------------|
| C  | -2.06545600 | 1.95833300  | -1.01571000 |
| C  | -1.27419800 | 0.70254000  | -0.68699600 |
| C  | -1.84536600 | -0.58817900 | -0.94277700 |
| N  | -0.11356500 | 0.97450800  | -0.10842200 |
| N  | 0.58011800  | -0.22761500 | 0.27639700  |
| C  | 3.15579200  | 0.68163400  | -0.17555300 |
| C  | 3.02378000  | 1.96529900  | -0.72249600 |
| C  | 3.92558700  | 2.40220400  | -1.69024300 |
| C  | 4.97898800  | 1.58324300  | -2.12984300 |
| C  | 5.09598800  | 0.30487900  | -1.56935100 |
| C  | 4.19297900  | -0.14772500 | -0.60410900 |
| C  | 5.95439600  | 2.07624000  | -3.17233300 |
| S  | 1.95492000  | 0.08328800  | 1.04638300  |
| O  | 1.91643300  | 1.16892200  | 2.06855000  |
| O  | 2.48639600  | -1.22868600 | 1.51898700  |
| H  | -2.28272700 | 2.04259400  | -2.09013200 |
| H  | -3.03539200 | 1.97598100  | -0.49886800 |
| H  | -1.09219900 | -1.35836200 | -1.15915000 |
| H  | 2.21775900  | 2.61118600  | -0.39215400 |
| H  | 3.81477500  | 3.40067600  | -2.10952000 |
| H  | 5.90710400  | -0.34638800 | -1.88900100 |
| H  | 4.29062300  | -1.13869900 | -0.17258500 |
| H  | 6.72582600  | 1.32826000  | -3.38375500 |
| H  | 5.44806900  | 2.31032200  | -4.11784200 |
| H  | 6.45910600  | 2.99494700  | -2.84655400 |
| Li | -0.86911700 | -1.43952100 | 0.96516300  |

|   |             |             |             |    |             |             |             |
|---|-------------|-------------|-------------|----|-------------|-------------|-------------|
| O | -0.57622000 | -3.41185600 | 1.10129100  | Li | 0.01390200  | -2.65946700 | 0.56967200  |
| O | -1.51052400 | -1.02499700 | 2.80521500  | H  | -1.97280500 | -0.12016000 | -3.70005400 |
| C | 0.72542500  | -4.01226700 | 0.95192600  | H  | -3.71097600 | -0.25757100 | -3.36732800 |
| C | 0.58128500  | -4.88559900 | -0.29163800 | H  | -2.90806700 | 0.35799500  | 0.40965700  |
| C | -0.86279000 | -5.42689000 | -0.16397200 | C  | 1.22283400  | 0.84260400  | 0.18734600  |
| C | -1.54947900 | -4.43388600 | 0.80541600  | C  | 0.82247300  | 1.94555600  | -0.57228000 |
| C | -1.80366800 | 0.37779000  | 3.05516600  | C  | 1.76738800  | 2.65505000  | -1.31761600 |
| C | -0.96710000 | 0.76968900  | 4.27365800  | C  | 3.11816000  | 2.28309600  | -1.32093800 |
| C | -0.85904000 | -0.55906400 | 5.03686000  | C  | 3.49911800  | 1.16568800  | -0.55854200 |
| C | -0.71843800 | -1.56322400 | 3.89464200  | C  | 2.56206300  | 0.44148900  | 0.17725000  |
| H | 1.45047100  | -3.19962000 | 0.88101400  | C  | 4.14242200  | 3.05529200  | -2.11893200 |
| H | 0.94709000  | -4.62117400 | 1.84286700  | S  | -0.06035700 | -0.11378300 | 1.06322700  |
| H | 1.33175000  | -5.68111600 | -0.33557500 | O  | -0.63278600 | 0.85285200  | 2.07498600  |
| H | 0.68508800  | -4.26686200 | -1.18952800 | O  | 0.70729600  | -1.26561600 | 1.74220700  |
| H | -1.36953200 | -5.46658900 | -1.13242400 | H  | -0.21777500 | 2.26170000  | -0.56600100 |
| H | -0.87093500 | -6.43764800 | 0.25647900  | H  | 1.44935700  | 3.51412000  | -1.90507800 |
| H | -1.84781700 | -4.92699700 | 1.74063500  | H  | 4.54494100  | 0.86279500  | -0.54100400 |
| H | -2.42278400 | -3.93467600 | 0.38026700  | H  | 2.85991600  | -0.42621400 | 0.75876700  |
| H | -1.54797700 | 0.94465600  | 2.15567500  | H  | 4.93110300  | 3.46319200  | -1.47311300 |
| H | -2.88034500 | 0.46909700  | 3.24909900  | H  | 4.63838200  | 2.41711000  | -2.86171300 |
| H | -1.43553700 | 1.56920300  | 4.85639300  | H  | 3.68344300  | 3.89324100  | -2.65398500 |
| H | 0.02392800  | 1.10213700  | 3.94816500  | O  | 1.10060200  | -3.81751400 | -0.65088200 |
| H | -0.00953400 | -0.59543300 | 5.72602100  | C  | 1.96567200  | -3.03993900 | -1.52844400 |
| H | -1.77561300 | -0.75463400 | 5.60745300  | C  | 1.68805700  | -3.53005600 | -2.95430000 |
| H | -1.10288800 | -2.55934500 | 4.13324800  | C  | 0.26170200  | -4.08945000 | -2.83969200 |
| H | 0.32296900  | -1.65317800 | 3.56155900  | C  | 0.29314700  | -4.71572000 | -1.45058800 |
| C | -3.06799900 | -0.71380400 | -1.84316500 | H  | 1.70225500  | -1.98597200 | -1.40283400 |
| H | -3.84271600 | 0.01064800  | -1.54873300 | H  | 3.00364300  | -3.19053000 | -1.21288500 |
| H | -2.85182000 | -0.47344400 | -2.90739900 | H  | 2.38919600  | -4.32542900 | -3.23458900 |
| C | -3.70870700 | -2.11095400 | -1.82863500 | H  | 1.77658400  | -2.72205200 | -3.68605100 |
| H | -2.94109600 | -2.86015700 | -2.07925000 | H  | -0.47082400 | -3.27459900 | -2.86600800 |
| H | -4.03628200 | -2.34183600 | -0.80359700 | H  | 0.01551400  | -4.81493400 | -3.62146600 |
| C | -4.89202500 | -2.27064800 | -2.79339500 | H  | 0.76773200  | -5.70755100 | -1.46513300 |
| H | -5.66564600 | -1.52669100 | -2.54770600 | H  | -0.68339100 | -4.80060900 | -0.96779300 |
| H | -4.56112200 | -2.03657500 | -3.81680200 | O  | -1.02210900 | -4.03848800 | 1.61101800  |
| C | -5.51981500 | -3.67048500 | -2.77813300 | C  | -2.33747200 | -3.60434500 | 2.04385200  |
| H | -4.74762000 | -4.41497200 | -3.02099900 | C  | -2.25587700 | -3.53445800 | 3.56493800  |
| H | -5.85809300 | -3.90521200 | -1.75835800 | C  | -1.31596100 | -4.70734600 | 3.88419100  |
| C | -6.69389200 | -3.82365800 | -3.74996700 | C  | -0.32040000 | -4.65813400 | 2.71944300  |
| H | -6.38298700 | -3.62604800 | -4.78413500 | H  | -2.53915500 | -2.64800900 | 1.55372200  |
| H | -7.11320000 | -4.83707500 | -3.71770100 | H  | -3.07975200 | -4.34467200 | 1.71386800  |
| H | -7.50376500 | -3.12233700 | -3.51028900 | H  | -3.23745100 | -3.62521500 | 4.04016200  |
| H | -1.50174800 | 2.84460400  | -0.70663700 | H  | -1.80657900 | -2.58462200 | 3.87610100  |

### TS (4-5)b

E= -1715.508344 H

|   |             |             |             |
|---|-------------|-------------|-------------|
| C | -2.78769000 | 0.26411400  | -3.07593500 |
| C | -2.44573400 | 0.04401500  | -1.61380100 |
| C | -3.20801300 | 0.57724400  | -0.61341600 |
| N | -1.27400000 | -0.69458000 | -1.45343300 |
| N | -1.01473200 | -1.20081900 | -0.24334200 |

|   |             |             |             |
|---|-------------|-------------|-------------|
| H | -1.97280500 | -0.12016000 | -3.70005400 |
| H | -3.71097600 | -0.25757100 | -3.36732800 |
| H | -2.90806700 | 0.35799500  | 0.40965700  |
| C | 1.22283400  | 0.84260400  | 0.18734600  |
| C | 0.82247300  | 1.94555600  | -0.57228000 |
| C | 1.76738800  | 2.65505000  | -1.31761600 |
| C | 3.11816000  | 2.28309600  | -1.32093800 |
| C | 3.49911800  | 1.16568800  | -0.55854200 |
| C | 2.56206300  | 0.44148900  | 0.17725000  |
| C | 4.14242200  | 3.05529200  | -2.11893200 |
| S | -0.06035700 | -0.11378300 | 1.06322700  |
| O | -0.63278600 | 0.85285200  | 2.07498600  |
| O | 0.70729600  | -1.26561600 | 1.74220700  |
| H | -0.21777500 | 2.26170000  | -0.56600100 |
| H | 1.44935700  | 3.51412000  | -1.90507800 |
| H | 4.54494100  | 0.86279500  | -0.54100400 |
| H | 2.85991600  | -0.42621400 | 0.75876700  |
| H | 4.93110300  | 3.46319200  | -1.47311300 |
| H | 4.63838200  | 2.41711000  | -2.86171300 |
| H | 3.68344300  | 3.89324100  | -2.65398500 |
| O | 1.10060200  | -3.81751400 | -0.65088200 |
| C | 1.96567200  | -3.03993900 | -1.52844400 |
| C | 1.68805700  | -3.53005600 | -2.95430000 |
| C | 0.26170200  | -4.08945000 | -2.83969200 |
| C | 0.29314700  | -4.71572000 | -1.45058800 |
| H | 1.70225500  | -1.98597200 | -1.40283400 |
| H | 3.00364300  | -3.19053000 | -1.21288500 |
| H | 2.38919600  | -4.32542900 | -3.23458900 |
| H | 1.77658400  | -2.72205200 | -3.68605100 |
| H | -0.47082400 | -3.27459900 | -2.86600800 |
| H | 0.01551400  | -4.81493400 | -3.62146600 |
| H | 0.76773200  | -5.70755100 | -1.46513300 |
| H | -0.68339100 | -4.80060900 | -0.96779300 |
| O | -1.02210900 | -4.03848800 | 1.61101800  |
| C | -2.33747200 | -3.60434500 | 2.04385200  |
| C | -2.25587700 | -3.53445800 | 3.56493800  |
| C | -1.31596100 | -4.70734600 | 3.88419100  |
| C | -0.32040000 | -4.65813400 | 2.71944300  |
| H | -2.53915500 | -2.64800900 | 1.55372200  |
| H | -3.07975200 | -4.34467200 | 1.71386800  |
| H | -3.23745100 | -3.62521500 | 4.04016200  |
| H | -1.80657900 | -2.58462200 | 3.87610100  |
| H | -0.81807900 | -4.61290800 | 4.85387900  |
| H | -1.87055900 | -5.65323100 | 3.87566100  |
| H | 0.02536400  | -5.64819700 | 2.40325800  |
| H | 0.55399700  | -4.04059800 | 2.95826900  |
| H | -2.93514800 | 1.32413900  | -3.32463500 |
| C | -4.47406100 | 1.38254100  | -0.79044800 |
| H | -5.35683400 | 0.73331300  | -0.95676500 |
| H | -4.41975600 | 2.01299700  | -1.69269000 |
| C | -4.78594500 | 2.27946400  | 0.42010500  |

|   |             |            |             |
|---|-------------|------------|-------------|
| H | -4.84483800 | 1.65036300 | 1.32122200  |
| H | -3.94147300 | 2.96402000 | 0.58726500  |
| C | -6.08411800 | 3.08523500 | 0.28524300  |
| H | -6.92015700 | 2.39734300 | 0.08470500  |
| H | -6.01637100 | 3.74429500 | -0.59409400 |
| C | -6.41653800 | 3.92846300 | 1.52318300  |
| H | -5.58251900 | 4.61468800 | 1.72912500  |
| H | -6.48982400 | 3.26821200 | 2.39949000  |
| C | -7.71366900 | 4.73102700 | 1.38422700  |
| H | -8.57306500 | 4.07084200 | 1.20846800  |
| H | -7.92406900 | 5.31477100 | 2.28906900  |
| H | -7.66042500 | 5.43360000 | 0.54232400  |

### 5b

E=-1128.324486 H

|    |             |             |             |
|----|-------------|-------------|-------------|
| C  | -2.73343600 | -0.15523700 | -3.41867200 |
| C  | -2.99329000 | -0.70520000 | -2.04699700 |
| N  | -1.72547400 | -1.10539900 | -1.37025800 |
| N  | -1.65534600 | -1.02826600 | -0.12957200 |
| H  | -2.08745800 | -0.83925100 | -3.98514600 |
| H  | -3.64580800 | 0.01266800  | -3.99814400 |
| Li | 0.13001000  | -1.55876400 | 0.57923000  |
| O  | 1.06213100  | -3.17660900 | -0.13402500 |
| O  | -0.01016800 | -1.90528600 | 2.55235400  |
| C  | 0.84950100  | -3.52343400 | -1.52912000 |
| C  | 0.34442700  | -4.98384600 | -1.55016000 |
| C  | 0.13673200  | -5.32594600 | -0.06071300 |
| C  | 1.13514400  | -4.39928700 | 0.62423900  |
| C  | -1.32059600 | -1.88678900 | 3.17434000  |
| C  | -1.16573900 | -0.99392300 | 4.40127400  |
| C  | 0.26846100  | -1.31946300 | 4.84621200  |
| C  | 0.99671400  | -1.48620100 | 3.50933100  |
| H  | 0.12423000  | -2.80731400 | -1.92548600 |
| H  | 1.79782100  | -3.41425100 | -2.06964300 |
| H  | 1.09754200  | -5.64329700 | -1.99428600 |
| H  | -0.57599000 | -5.08769600 | -2.13164400 |
| H  | -0.88130500 | -5.07395800 | 0.25758700  |
| H  | 0.31764300  | -6.38148000 | 0.16456300  |
| H  | 2.15786900  | -4.80239400 | 0.57598600  |
| H  | 0.89372600  | -4.15142100 | 1.65971600  |
| H  | -2.03229100 | -1.51801500 | 2.43164400  |
| H  | -1.59377600 | -2.91305100 | 3.45643100  |
| H  | -1.91585800 | -1.20502500 | 5.16918700  |
| H  | -1.25135900 | 0.06142100  | 4.11548200  |
| H  | 0.71988100  | -0.53911300 | 5.46603700  |
| H  | 0.28547600  | -2.25807500 | 5.41219100  |
| H  | 1.78680200  | -2.24422000 | 3.53846200  |
| H  | 1.42926500  | -0.54386500 | 3.15520600  |
| C  | -4.17900000 | -0.94961000 | -1.47378300 |
| H  | -4.13167600 | -1.36730000 | -0.46334100 |
| O  | 1.41429000  | -0.04366000 | 0.41689100  |

|   |              |             |             |
|---|--------------|-------------|-------------|
| C | 2.73582400   | -0.04709000 | -0.17779000 |
| C | 0.89733500   | 1.30908800  | 0.47139300  |
| C | 2.97099200   | 1.37740100  | -0.68556200 |
| H | 3.46124700   | -0.32805200 | 0.59650600  |
| H | 2.75870000   | -0.80112100 | -0.96981900 |
| C | 2.11163700   | 2.21285500  | 0.27559700  |
| H | 0.15913100   | 1.43981800  | -0.32906300 |
| H | 0.39442400   | 1.44007500  | 1.43416500  |
| H | 2.60256300   | 1.48269100  | -1.71253100 |
| H | 4.03027100   | 1.65055000  | -0.67204600 |
| H | 1.83854000   | 3.19274300  | -0.12688800 |
| H | 2.63500400   | 2.36293800  | 1.22750700  |
| H | -2.19164900  | 0.80096200  | -3.36014200 |
| C | -5.55887100  | -0.73354200 | -2.03202300 |
| H | -5.51710200  | -0.22741100 | -3.00467000 |
| H | -6.11562300  | -0.05946700 | -1.36099200 |
| C | -6.36379300  | -2.04100000 | -2.17608700 |
| H | -5.82326200  | -2.72029700 | -2.85070700 |
| H | -6.40660200  | -2.54781600 | -1.20080700 |
| C | -7.78813800  | -1.82207600 | -2.70190300 |
| H | -7.74117300  | -1.30867000 | -3.67433900 |
| H | -8.32544500  | -1.14171600 | -2.02396300 |
| C | -8.59205000  | -3.11937400 | -2.85727400 |
| H | -8.04960600  | -3.80286600 | -3.52623800 |
| H | -8.65150500  | -3.62806700 | -1.88434100 |
| C | -10.00588400 | -2.89333200 | -3.40095800 |
| H | -10.55251400 | -3.83883400 | -3.50308000 |
| H | -10.58987200 | -2.24298100 | -2.73691700 |
| H | -9.97993800  | -2.41698700 | -4.38957100 |

### TS (5-6)b

E= -1128.312937 H

|    |             |             |             |
|----|-------------|-------------|-------------|
| C  | -4.33707300 | -4.72712500 | -0.02246500 |
| O  | -3.52176200 | -3.53484200 | 0.11648400  |
| C  | -3.20411800 | -3.31037800 | 1.51717900  |
| C  | -3.62577300 | -4.58613300 | 2.24438200  |
| C  | -4.80760000 | -5.06839400 | 1.38997400  |
| Li | -2.40460700 | -2.73074400 | -1.28535400 |
| N  | -0.41888400 | -2.89039500 | -0.87457200 |
| N  | 0.39827600  | -3.05948800 | -0.07546400 |
| C  | 2.35803000  | -2.98066000 | -0.94771000 |
| C  | 3.61626900  | -3.17237600 | -0.16358500 |
| C  | 2.21422400  | -2.76410600 | -2.24563800 |
| H  | -5.15129700 | -4.50520100 | -0.71815200 |
| H  | -3.71897200 | -5.52996700 | -0.44349000 |
| H  | -2.13531100 | -3.09328900 | 1.59302000  |
| H  | -3.77170600 | -2.43816600 | 1.86497400  |
| H  | -3.89284100 | -4.39634800 | 3.28801000  |
| H  | -2.81405400 | -5.32258500 | 2.22450300  |
| H  | -5.02065100 | -6.13501300 | 1.50649300  |
| H  | -5.71563800 | -4.50617000 | 1.63812000  |

|   |             |             |             |    |             |             |             |
|---|-------------|-------------|-------------|----|-------------|-------------|-------------|
| H | 4.55655300  | -3.13040300 | -0.74904600 | H  | -1.42644000 | 0.23022900  | -3.09845800 |
| H | 3.61480900  | -4.14253900 | 0.35868800  | H  | -3.13368400 | 0.66952100  | -2.98343100 |
| H | 1.16163200  | -2.65786900 | -2.59629300 | Li | -0.61995500 | -1.34540900 | -0.20627700 |
| O | -2.82393800 | -3.60476600 | -2.99084100 | O  | 0.08908800  | -3.20276000 | -0.67586100 |
| C | -2.99177200 | -2.80494500 | -4.19064200 | O  | -0.87275400 | -1.53339700 | 1.80733200  |
| C | -2.00459800 | -3.37976000 | -5.20132000 | C  | 0.22573700  | -3.52225500 | -2.08122500 |
| C | -2.01952700 | -4.87334600 | -4.84269700 | C  | -0.66888200 | -4.73653100 | -2.30896500 |
| C | -2.12871400 | -4.84238100 | -3.31712200 | C  | -0.50172300 | -5.49549000 | -0.98410700 |
| H | -4.02923200 | -2.90372700 | -4.53659400 | C  | -0.42593700 | -4.35738300 | 0.03870700  |
| H | -2.80382600 | -1.76193500 | -3.92394900 | C  | -2.10175100 | -1.14705200 | 2.46733400  |
| H | -1.00655700 | -2.95699400 | -5.03878000 | C  | -1.66464300 | -0.29225200 | 3.65226400  |
| H | -2.30364300 | -3.17869000 | -6.23425500 | C  | -0.36907000 | -0.99804400 | 4.07933500  |
| H | -2.89675900 | -5.36282300 | -5.28171900 | C  | 0.23547100  | -1.41922700 | 2.73463000  |
| H | -1.12518900 | -5.40663400 | -5.17721500 | H  | -0.06793300 | -2.63987900 | -2.65620500 |
| H | -1.14364000 | -4.81284100 | -2.83777100 | H  | 1.27827500  | -3.75486800 | -2.29573200 |
| H | -2.70272400 | -5.67761000 | -2.90451900 | H  | -0.36823600 | -5.31979200 | -3.18454800 |
| C | -4.12464200 | -0.26191800 | -1.26601700 | H  | -1.70883300 | -4.41733000 | -2.44230900 |
| O | -2.78803400 | -0.81695800 | -1.37733200 | H  | -1.32486800 | -6.18394600 | -0.77152700 |
| C | -1.79645900 | 0.23095300  | -1.20561100 | H  | 0.43177600  | -6.07045100 | -0.99060300 |
| C | -2.56524800 | 1.53960000  | -1.36674600 | H  | 0.24374300  | -4.57536600 | 0.87706100  |
| C | -3.93749200 | 1.17565300  | -0.78011400 | H  | -1.41340100 | -4.10107500 | 0.43747300  |
| H | -4.59643300 | -0.29871100 | -2.25601500 | H  | -2.71868300 | -0.62595100 | 1.73266000  |
| H | -4.69993000 | -0.88876800 | -0.57856900 | H  | -2.63042100 | -2.05098600 | 2.80161600  |
| H | -1.35765800 | 0.14073000  | -0.20439500 | H  | -2.41978500 | -0.25513200 | 4.44328300  |
| H | -1.01012700 | 0.07787500  | -1.94904700 | H  | -1.45627900 | 0.73294600  | 3.32276300  |
| H | -2.07841900 | 2.37022200  | -0.84753000 | H  | 0.30770100  | -0.35669700 | 4.65189200  |
| H | -2.65762900 | 1.80124700  | -2.42746100 | H  | -0.60111700 | -1.87849600 | 4.68978500  |
| H | -3.90421300 | 1.20816200  | 0.31510000  | H  | 0.75857900  | -2.38054400 | 2.78204200  |
| H | -4.74351000 | 1.83303800  | -1.11883800 | H  | 0.92571200  | -0.66543500 | 2.34146200  |
| C | 3.23738300  | -2.66224000 | -3.36105900 | C  | -3.53322800 | -1.19236800 | -1.07114100 |
| H | 4.25652600  | -2.69967600 | -2.95008800 | H  | -3.59214200 | -1.96043000 | -0.28187900 |
| H | 3.14684100  | -1.68559300 | -3.86690100 | O  | 1.10462700  | -0.28039200 | -0.31151700 |
| C | 3.08282300  | -3.76564700 | -4.42480800 | C  | 2.45741400  | -0.78081100 | -0.43402100 |
| H | 2.04817200  | -3.75737200 | -4.80111800 | C  | 1.11369500  | 1.16495800  | -0.23971900 |
| H | 3.22259500  | -4.74545800 | -3.94504700 | C  | 3.34414200  | 0.44969500  | -0.64018000 |
| C | 4.04969800  | -3.63039600 | -5.60854800 | H  | 2.71362300  | -1.31917700 | 0.48737000  |
| H | 5.08544500  | -3.63306600 | -5.23624700 | H  | 2.49442100  | -1.48573600 | -1.26926800 |
| H | 3.90195100  | -2.65033100 | -6.08759700 | C  | 2.55531100  | 1.54724400  | 0.08970100  |
| C | 3.89261100  | -4.73385600 | -6.66293100 | H  | 0.80119600  | 1.57283200  | -1.20950800 |
| H | 2.85515800  | -4.74093500 | -7.02780000 | H  | 0.38756900  | 1.47236500  | 0.51847700  |
| H | 4.05594500  | -5.71290300 | -6.18977200 | H  | 3.42550900  | 0.68725000  | -1.70730900 |
| C | 4.84771400  | -4.57759000 | -7.84999200 | H  | 4.35358200  | 0.30254000  | -0.24486100 |
| H | 5.89531900  | -4.59850500 | -7.52273000 | H  | 2.80372500  | 2.55797500  | -0.24734600 |
| H | 4.71427100  | -5.38259800 | -8.58322200 | H  | 2.72999400  | 1.49261400  | 1.17102800  |
| H | 4.68467500  | -3.62488000 | -8.37057800 | C  | -4.89806000 | -0.98595600 | -1.71971900 |
| H | 3.70933400  | -2.41617800 | 0.63232500  | H  | -5.62334100 | -0.64990900 | -0.95775200 |

**6b**

E= -1018.822839H

|   |             |             |             |   |             |             |             |
|---|-------------|-------------|-------------|---|-------------|-------------|-------------|
| C | -2.22894200 | 0.46569600  | -2.38066700 | H | -5.48058100 | -3.07122600 | -1.62204100 |
| C | -2.32627900 | -0.61286900 | -1.30178900 | C | -6.86473300 | -2.09350300 | -2.96604300 |
|   |             |             |             | H | -7.55446700 | -1.75358400 | -2.17832800 |

|   |             |             |             |
|---|-------------|-------------|-------------|
| H | -6.84463000 | -1.29043800 | -3.71850600 |
| C | -7.42481300 | -3.36898400 | -3.60925200 |
| H | -6.73426700 | -3.71228400 | -4.39319100 |
| H | -7.45474200 | -4.17101300 | -2.85748500 |
| C | -8.82170300 | -3.18270300 | -4.20932100 |
| H | -8.81908800 | -2.41060900 | -4.98956600 |
| H | -9.19186100 | -4.11061600 | -4.66260200 |
| H | -9.54621400 | -2.87530600 | -3.44411400 |
| H | -1.93254900 | 1.43030700  | -1.93644700 |

### 1c

E= -1244.131855 H

|   |             |             |             |
|---|-------------|-------------|-------------|
| C | 2.57864900  | 5.12245900  | -2.22252000 |
| C | 2.44869900  | 4.24638300  | -0.96976600 |
| C | 2.08444600  | 2.79031600  | -1.28552400 |
| C | 1.96919600  | 1.91627700  | -0.01654300 |
| C | 1.63760800  | 0.47143200  | -0.32654800 |
| N | 0.47023700  | 0.01484900  | -0.61370900 |
| N | -0.59353300 | 0.91263500  | -0.67334200 |
| C | -2.38118400 | -0.77306300 | -1.85093500 |
| C | -2.03203100 | -2.12573800 | -1.88289300 |
| C | -2.24977700 | -2.84965700 | -3.05179700 |
| C | -2.81228600 | -2.24542500 | -4.18783800 |
| C | -3.15682200 | -0.88758600 | -4.12244100 |
| C | -2.94372800 | -0.14421900 | -2.96270500 |
| C | -3.03758800 | -3.04674600 | -5.44540900 |
| S | -2.10949200 | 0.17309300  | -0.36318100 |
| O | -2.04105000 | -0.75649400 | 0.77243300  |
| O | -3.03259000 | 1.31642400  | -0.31746100 |
| H | 3.33692800  | 4.68898800  | -2.89170000 |
| H | 1.63079800  | 5.10173200  | -2.78077100 |
| H | 1.68647600  | 4.67534600  | -0.30249300 |
| H | 3.39518500  | 4.26980600  | -0.40968800 |
| H | 2.84532300  | 2.35801500  | -1.94932800 |
| H | 1.13646100  | 2.75805500  | -1.83832400 |
| H | 2.91789100  | 1.94586000  | 0.53108500  |
| H | 1.21443700  | 2.34842300  | 0.65746900  |
| H | -0.52435400 | 1.76181600  | -0.10151300 |
| H | -1.60334000 | -2.60102100 | -1.00770800 |
| H | -1.98119500 | -3.90279300 | -3.08274000 |
| H | -3.60033900 | -0.40517500 | -4.98948000 |
| H | -3.21907100 | 0.90438900  | -2.92042300 |
| H | -3.51739100 | -2.44555500 | -6.22350400 |
| H | -2.08888400 | -3.42492700 | -5.84668300 |
| H | -3.67232100 | -3.91975000 | -5.24998200 |
| C | 2.77126800  | -0.51675900 | -0.34289800 |
| H | 2.42122600  | -1.50910600 | -0.63904800 |
| H | 3.55492100  | -0.19266400 | -1.04070400 |
| H | 3.23739000  | -0.58401900 | 0.64897300  |
| C | 2.95188900  | 6.57828000  | -1.91374500 |
| H | 2.19382200  | 7.01305700  | -1.24645200 |

|   |            |            |             |
|---|------------|------------|-------------|
| H | 3.89839000 | 6.59813200 | -1.35450700 |
| C | 3.08518000 | 7.44844800 | -3.16665600 |
| H | 2.14379300 | 7.48387800 | -3.73001700 |
| H | 3.35599100 | 8.47987800 | -2.90987600 |
| H | 3.85917500 | 7.06061300 | -3.84153800 |

### 3c

E= -1948.552512 H

|   |             |             |             |
|---|-------------|-------------|-------------|
| C | -2.56176700 | 1.26515200  | -1.88969400 |
| C | -1.67079600 | 0.39523500  | -1.03836600 |
| N | -0.44481500 | 0.76996300  | -0.90475000 |
| N | 0.38691300  | -0.01977600 | -0.09666000 |
| C | 2.25417000  | -0.48474200 | -2.09895600 |
| C | 1.99043900  | 0.24759900  | -3.26100400 |
| C | 2.17167100  | -0.34904800 | -4.50686400 |
| C | 2.61803700  | -1.67544900 | -4.62132500 |
| C | 2.88073500  | -2.38831300 | -3.44377900 |
| C | 2.69822300  | -1.80454700 | -2.18865000 |
| C | 2.81989300  | -2.30332600 | -5.97943900 |
| S | 1.95677100  | 0.26230800  | -0.47927900 |
| O | 2.33266900  | 1.69043400  | -0.63855200 |
| O | 2.73197900  | -0.53789800 | 0.50586200  |
| H | -3.03477800 | 0.68132000  | -2.69223400 |
| H | -3.37991000 | 1.70083400  | -1.29803900 |
| H | 1.65717600  | 1.27728100  | -3.18682500 |
| H | 1.96661900  | 0.22593100  | -5.40752300 |
| H | 3.23419200  | -3.41494100 | -3.50777800 |
| H | 2.91150400  | -2.36432200 | -1.28376200 |
| H | 3.07139800  | -3.36561300 | -5.89679900 |
| H | 1.91759100  | -2.21657500 | -6.59715100 |
| H | 3.63148000  | -1.80990100 | -6.53002100 |
| O | 0.68707600  | -1.96734800 | 2.78049800  |
| O | 1.48731600  | 1.22256000  | 3.02078300  |
| C | 1.12326200  | -3.09371200 | 1.99489100  |
| C | 0.65735200  | -4.31557400 | 2.79414500  |
| C | 0.68596400  | -3.82221000 | 4.26684100  |
| C | 0.97977700  | -2.31207500 | 4.14665200  |
| C | 1.45916100  | 2.61378800  | 2.60424900  |
| C | 2.91567000  | 3.07022900  | 2.58675000  |
| C | 3.53091800  | 2.22736200  | 3.71331900  |
| C | 2.79953100  | 0.89428300  | 3.55137900  |
| H | 0.67707200  | -2.99658900 | 1.00448400  |
| H | 2.21613400  | -3.06389300 | 1.89556700  |
| H | 1.30449200  | -5.18092400 | 2.62401100  |
| H | -0.36010700 | -4.59381300 | 2.50152600  |
| H | -0.27398100 | -4.00130200 | 4.76005700  |
| H | 1.45999900  | -4.32227600 | 4.85626100  |
| H | 2.03724900  | -2.09830000 | 4.35402200  |
| H | 0.36001800  | -1.68169100 | 4.78789300  |
| H | 0.98223200  | 2.66405200  | 1.62285700  |
| H | 0.86278400  | 3.18326400  | 3.32913200  |

|    |             |             |             |    |             |             |             |
|----|-------------|-------------|-------------|----|-------------|-------------|-------------|
| H  | 3.01356300  | 4.14813700  | 2.74852900  | C  | 4.62202200  | 1.23495800  | -2.61239400 |
| H  | 3.36702200  | 2.81575700  | 1.62277000  | C  | 4.73643500  | -0.02194600 | -2.00462600 |
| H  | 4.61558400  | 2.11326400  | 3.62452400  | C  | 3.91102400  | -0.38875300 | -0.93897900 |
| H  | 3.31248500  | 2.67304900  | 4.69135700  | C  | 5.51000500  | 1.63153000  | -3.76825000 |
| H  | 2.66108000  | 0.35964200  | 4.49628100  | S  | 1.83488600  | 0.01727500  | 0.88398500  |
| H  | 3.30046200  | 0.24007400  | 2.83158000  | O  | 1.84923700  | 1.18882700  | 1.80661800  |
| C  | -2.09725500 | -2.07932100 | -1.41067400 | O  | 2.39876400  | -1.24979800 | 1.43354900  |
| H  | -2.54267000 | -1.85142800 | -2.38929900 | H  | -2.67015100 | 1.83565400  | -1.89970000 |
| H  | -1.02520600 | -2.23450100 | -1.58645600 | H  | -3.37840800 | 1.58433500  | -0.30677000 |
| C  | -2.71945500 | -3.36799200 | -0.85757100 | H  | -3.15223400 | -0.72235400 | -1.18058000 |
| H  | -2.28406500 | -3.58378300 | 0.12983700  | H  | 2.09233200  | 2.47113700  | -0.67043300 |
| H  | -3.79539200 | -3.21022900 | -0.68851300 | H  | 3.54728100  | 3.10638400  | -2.56809600 |
| C  | -2.52092500 | -4.58435400 | -1.77163400 | H  | 5.48343000  | -0.72481200 | -2.36821600 |
| H  | -2.96575000 | -4.37682000 | -2.75631000 | H  | 4.00855700  | -1.36366300 | -0.47209600 |
| H  | -1.44511900 | -4.73214200 | -1.94859100 | H  | 6.22246500  | 0.83746700  | -4.01519800 |
| C  | -3.12099500 | -5.87984100 | -1.20971500 | H  | 4.92195400  | 1.84462000  | -4.67052900 |
| H  | -2.68356000 | -6.08172900 | -0.22119100 | H  | 6.08523900  | 2.53880700  | -3.54209600 |
| H  | -4.19874700 | -5.73896000 | -1.04333400 | Li | -1.04179100 | -1.51522000 | 1.03734300  |
| C  | -2.90110900 | -7.09272000 | -2.11832300 | O  | -0.80734100 | -3.48849200 | 1.31487700  |
| H  | -1.83174800 | -7.28175200 | -2.27843900 | O  | -1.51383100 | -0.99079200 | 2.92111500  |
| H  | -3.33746700 | -8.00195900 | -1.68683800 | C  | 0.48748200  | -4.11759800 | 1.36726600  |
| H  | -3.35988400 | -6.94112400 | -3.10388700 | C  | 0.44780100  | -5.13557200 | 0.23169200  |
| H  | -1.98815600 | 2.08021000  | -2.34124600 | C  | -1.00441500 | -5.65538600 | 0.30332200  |
| C  | -2.27965900 | -0.86995200 | -0.46796500 | C  | -1.78288900 | -4.49316900 | 0.96432200  |
| H  | -3.35390100 | -0.70801000 | -0.30258800 | C  | -1.80234300 | 0.40758900  | 3.18675400  |
| H  | -1.83216600 | -1.09296400 | 0.50402000  | C  | -0.80568400 | 0.84003500  | 4.26043000  |
| Li | 0.41859900  | -0.15081500 | 1.99248500  | C  | -0.60691700 | -0.45956100 | 5.05457900  |
| O  | -1.45278200 | 0.29295900  | 2.69387200  | C  | -0.62937500 | -1.51332600 | 3.94697100  |
| C  | -2.02164800 | 1.61452200  | 2.69763400  | H  | 1.23479300  | -3.32788000 | 1.26244600  |
| C  | -2.20565000 | -0.45690200 | 3.66098300  | H  | 0.61487100  | -4.61377700 | 2.34248700  |
| C  | -3.54002400 | 1.40745300  | 2.85107600  | H  | 1.19122200  | -5.92994600 | 0.35125500  |
| H  | -1.61316900 | 2.18170700  | 3.54608400  | H  | 0.63249400  | -4.63064500 | -0.72248100 |
| H  | -1.72624800 | 2.10427600  | 1.76797800  | H  | -1.40421900 | -5.90561600 | -0.68358700 |
| C  | -3.66388500 | -0.01613200 | 3.46124100  | H  | -1.06372900 | -6.55558300 | 0.92421300  |
| H  | -2.02529600 | -1.51622600 | 3.47151900  | H  | -2.30559000 | -4.81995800 | 1.87286100  |
| H  | -1.85138300 | -0.20742400 | 4.67246200  | H  | -2.50829900 | -4.01885300 | 0.29831800  |
| H  | -4.04183200 | 1.45972900  | 1.88058600  | H  | -1.69751200 | 0.95827800  | 2.24883600  |
| H  | -3.97778300 | 2.17714400  | 3.49330400  | H  | -2.84036100 | 0.48464600  | 3.53792100  |
| H  | -4.17584200 | -0.69043000 | 2.76840500  | H  | -1.18423600 | 1.66736900  | 4.86916800  |
| H  | -4.21533500 | -0.02506000 | 4.40593400  | H  | 0.13360200  | 1.14672800  | 3.78853700  |
|    |             |             |             | H  | 0.32813800  | -0.48104900 | 5.62295600  |
|    |             |             |             | H  | -1.43771900 | -0.61686300 | 5.75355700  |
|    |             |             |             | H  | -1.01766600 | -2.48307100 | 4.27251800  |
|    |             |             |             | H  | 0.36503100  | -1.65642600 | 3.50756400  |
|    |             |             |             | C  | -1.38757700 | -1.84691800 | -1.72798800 |
|    |             |             |             | H  | -0.45094100 | -2.19482500 | -1.27140900 |
|    |             |             |             | H  | -2.02732100 | -2.74010500 | -1.82751200 |
|    |             |             |             | C  | -1.04353000 | -1.35318000 | -3.15233200 |
|    |             |             |             | H  | -1.96103400 | -0.97866400 | -3.63389500 |
|    |             |             |             | H  | -0.36698900 | -0.49056400 | -3.06941000 |
|    |             |             |             | C  | -0.40051600 | -2.41718900 | -4.05247800 |
|    |             |             |             | H  | 0.50564600  | -2.80757500 | -3.56396000 |

**4c**

E= -1715.520703H

|   |             |             |             |
|---|-------------|-------------|-------------|
| C | -2.42206800 | 1.70060400  | -0.83675800 |
| C | -1.53216900 | 0.48656400  | -0.61596700 |
| C | -2.11216600 | -0.82451500 | -0.84026900 |
| N | -0.33538300 | 0.79765300  | -0.15903300 |
| N | 0.42108200  | -0.36146900 | 0.21881600  |
| C | 2.95628700  | 0.50714900  | -0.45567100 |
| C | 2.83021000  | 1.77087700  | -1.04725100 |
| C | 3.65390500  | 2.12267700  | -2.11440500 |

|   |             |             |             |
|---|-------------|-------------|-------------|
| H | -1.08583600 | -3.27428400 | -4.15104800 |
| C | -0.03273700 | -1.90718000 | -5.45269800 |
| H | -0.93188400 | -1.49847600 | -5.93717900 |
| H | 0.66940900  | -1.06679600 | -5.35643200 |
| C | 0.58271300  | -2.98187500 | -6.35409900 |
| H | -0.11109100 | -3.81895400 | -6.50730500 |
| H | 0.83956900  | -2.58008400 | -7.34243400 |
| H | 1.50156800  | -3.39186900 | -5.91488300 |
| H | -1.94201100 | 2.61583600  | -0.47304500 |

### TS (4-5)c

E= -1715.502504 H

|    |             |             |             |
|----|-------------|-------------|-------------|
| C  | -2.82234700 | 0.07024800  | -3.17245100 |
| C  | -2.70980200 | -0.16836600 | -1.67098800 |
| C  | -3.77200000 | 0.21937300  | -0.89588600 |
| N  | -1.47428300 | -0.74314100 | -1.38745300 |
| N  | -1.22295000 | -1.20768800 | -0.15156400 |
| Li | -0.04851600 | -2.59518400 | 0.61167200  |
| H  | -2.03394400 | 0.75131300  | -3.52224000 |
| H  | -2.68133100 | -0.86836900 | -3.72705700 |
| H  | -4.61630900 | 0.64123300  | -1.44693400 |
| C  | 1.04179200  | 0.88122400  | 0.26682700  |
| C  | 0.68126600  | 1.99958100  | -0.49083500 |
| C  | 1.65552300  | 2.69426400  | -1.21218900 |
| C  | 2.99814100  | 2.29462200  | -1.19139100 |
| C  | 3.34008900  | 1.16439200  | -0.42978000 |
| C  | 2.37345000  | 0.45466100  | 0.28092900  |
| C  | 4.05477000  | 3.05265000  | -1.95987700 |
| S  | -0.26842700 | -0.06591800 | 1.11565700  |
| O  | -0.89055000 | 0.93411400  | 2.06646500  |
| O  | 0.49165700  | -1.18601900 | 1.85223800  |
| H  | -0.34857000 | 2.34535000  | -0.49776700 |
| H  | 1.36743200  | 3.56583800  | -1.79649000 |
| H  | 4.37914500  | 0.84086400  | -0.39130200 |
| H  | 2.64204000  | -0.42013700 | 0.86560900  |
| H  | 4.55142800  | 2.41179500  | -2.69987100 |
| H  | 3.62516900  | 3.90654200  | -2.49403900 |
| H  | 4.83886500  | 3.43581200  | -1.29371600 |
| O  | 1.19674900  | -3.63728400 | -0.58473100 |
| C  | 1.93492300  | -2.78110200 | -1.50597600 |
| C  | 1.80857800  | -3.42947900 | -2.88766400 |
| C  | 0.47789300  | -4.18669600 | -2.76908300 |
| C  | 0.54308100  | -4.69378100 | -1.33266000 |
| H  | 1.47496900  | -1.78852100 | -1.48388700 |
| H  | 2.96845000  | -2.70666600 | -1.15253500 |
| H  | 2.63350600  | -4.13003000 | -3.06576800 |
| H  | 1.81230500  | -2.68393900 | -3.68800500 |
| H  | -0.36368400 | -3.49355900 | -2.88375500 |
| H  | 0.37072500  | -4.99820100 | -3.49564300 |
| H  | 1.14597800  | -5.60982400 | -1.25510300 |
| H  | -0.43124900 | -4.87339600 | -0.87240000 |

|   |             |             |             |
|---|-------------|-------------|-------------|
| O | -0.88941500 | -4.13287700 | 1.59902500  |
| C | -2.17780400 | -3.85042700 | 2.20150500  |
| C | -1.94606000 | -3.94259200 | 3.70616600  |
| C | -0.90436900 | -5.06945500 | 3.79428900  |
| C | -0.03936900 | -4.81657300 | 2.55456300  |
| H | -2.49382200 | -2.86617300 | 1.84711400  |
| H | -2.90082400 | -4.60366000 | 1.85854100  |
| H | -2.86576100 | -4.15950900 | 4.25810800  |
| H | -1.52883100 | -3.00148400 | 4.08191000  |
| H | -0.31654400 | -5.04622300 | 4.71677500  |
| H | -1.39540600 | -6.04752400 | 3.72677300  |
| H | 0.33500000  | -5.73642300 | 2.09297000  |
| H | 0.81439400  | -4.16622800 | 2.78075300  |
| H | -3.79126600 | 0.49321200  | -3.45963600 |
| C | -4.00312800 | 0.14158100  | 0.59634400  |
| H | -3.07272600 | 0.29664200  | 1.15063500  |
| H | -4.35861100 | -0.86261200 | 0.89600700  |
| C | -5.04870700 | 1.16685800  | 1.07234200  |
| H | -4.69262700 | 2.18037600  | 0.83209300  |
| H | -5.98178200 | 1.03130300  | 0.50182700  |
| C | -5.35969400 | 1.07905500  | 2.57168600  |
| H | -4.43134700 | 1.22649100  | 3.14334800  |
| H | -5.70452200 | 0.06106200  | 2.81081200  |
| C | -6.41296700 | 2.08850000  | 3.04693400  |
| H | -7.33745500 | 1.94678400  | 2.46782900  |
| H | -6.06641600 | 3.10765800  | 2.82218500  |
| C | -6.72951900 | 1.97921600  | 4.54153400  |
| H | -5.83314000 | 2.15103200  | 5.15129900  |
| H | -7.48477300 | 2.71378900  | 4.84823400  |
| H | -7.11384500 | 0.98268300  | 4.79552200  |

### 5c

E= -1128.321859 H

|    |             |             |             |
|----|-------------|-------------|-------------|
| C  | -2.48772600 | 0.87590700  | -3.02986900 |
| C  | -2.91442000 | -0.05921500 | -1.93251500 |
| N  | -1.77981000 | -0.59593100 | -1.18449500 |
| N  | -1.73458700 | -0.45700800 | 0.05835000  |
| H  | -1.70609500 | 0.41575600  | -3.64957000 |
| H  | -3.32377900 | 1.15788800  | -3.67904100 |
| Li | -0.03961700 | -1.27856600 | 0.72038300  |
| O  | 0.49443200  | -3.13230900 | 0.16573600  |
| O  | -0.09282200 | -1.40293500 | 2.72274700  |
| C  | 0.23323800  | -3.53177700 | -1.20864700 |
| C  | -0.53195200 | -4.87020000 | -1.14192100 |
| C  | -0.91602500 | -4.99609800 | 0.34414300  |
| C  | 0.22876400  | -4.25756800 | 1.02755400  |
| C  | -1.25234500 | -0.91779100 | 3.44420800  |
| C  | -0.69103900 | 0.01388300  | 4.51298400  |
| C  | 0.61855000  | -0.69659900 | 4.88882500  |
| C  | 1.09574700  | -1.24850000 | 3.54061500  |
| H  | -0.34736500 | -2.72603400 | -1.66702300 |

|   |             |             |             |    |             |             |             |
|---|-------------|-------------|-------------|----|-------------|-------------|-------------|
| H | 1.18933000  | -3.63180600 | -1.73620200 | O  | -2.82742100 | -3.88956200 | 0.00739900  |
| H | 0.11983600  | -5.69933200 | -1.43772500 | C  | -2.01864900 | -4.07922100 | 1.19986300  |
| H | -1.40260400 | -4.87556500 | -1.80372600 | C  | -2.27420200 | -5.51988700 | 1.63237000  |
| H | -1.86295900 | -4.48210500 | 0.54593300  | C  | -3.73916800 | -5.72192000 | 1.21663000  |
| H | -1.00673000 | -6.03464100 | 0.67698000  | Li | -2.54426200 | -2.38682300 | -1.21102100 |
| H | 1.12788400  | -4.88771200 | 1.09856200  | N  | -0.56518700 | -1.80507300 | -1.31788600 |
| H | -0.00805500 | -3.85859800 | 2.01581700  | N  | 0.31677500  | -2.37418500 | -0.81419100 |
| H | -1.91172300 | -0.43525100 | 2.71943000  | C  | 2.23464600  | -1.80464000 | -1.11346600 |
| H | -1.77677000 | -1.77283000 | 3.89334100  | C  | 3.02813200  | -2.38239400 | 0.01443400  |
| H | -1.37384700 | 0.13932100  | 5.35857800  | C  | 2.77042600  | -1.45890300 | -2.28971500 |
| H | -0.48583800 | 1.00193500  | 4.08369100  | H  | -4.78942000 | -4.50013300 | -0.29243100 |
| H | 1.35792500  | -0.03231400 | 5.34596100  | H  | -3.54313900 | -5.58492200 | -0.95654200 |
| H | 0.41703600  | -1.51541100 | 5.58908200  | H  | -0.97954800 | -3.86669700 | 0.93642200  |
| H | 1.59313500  | -2.22091000 | 3.62549400  | H  | -2.34761400 | -3.36350700 | 1.96491600  |
| H | 1.76933600  | -0.55588300 | 3.02428700  | H  | -2.10312400 | -5.66709700 | 2.70263600  |
| C | -4.18155300 | -0.47743900 | -1.76562200 | H  | -1.61981000 | -6.20502900 | 1.08062000  |
| H | -4.92755600 | -0.10064400 | -2.47021300 | H  | -4.01493000 | -6.77324300 | 1.09295700  |
| O | 1.52666300  | -0.11340600 | 0.32375400  | H  | -4.41137200 | -5.27584600 | 1.95900000  |
| C | 2.76155900  | -0.47882000 | -0.34070400 | H  | 4.05202000  | -2.70384900 | -0.25542400 |
| C | 1.33482300  | 1.32152100  | 0.26317100  | H  | 2.51015600  | -3.25839500 | 0.43976600  |
| C | 3.27263400  | 0.79969200  | -1.00866700 | H  | 3.85965600  | -1.55890700 | -2.46337300 |
| H | 3.46217600  | -0.85329400 | 0.41648100  | O  | -3.11002300 | -2.97428800 | -3.00015100 |
| H | 2.54998700  | -1.28438300 | -1.04949400 | C  | -3.70005200 | -2.04887200 | -3.94994700 |
| C | 2.70269800  | 1.89638000  | -0.09607400 | C  | -2.91168800 | -2.23070600 | -5.24430300 |
| H | 0.58441500  | 1.54890900  | -0.50379300 | C  | -2.55240200 | -3.72299600 | -5.18934900 |
| H | 0.95327400  | 1.65256800  | 1.23378600  | C  | -2.26705400 | -3.93098900 | -3.70209200 |
| H | 2.85805700  | 0.89388500  | -2.01892200 | H  | -4.75801900 | -2.31106900 | -4.08116600 |
| H | 4.36401300  | 0.81860000  | -1.08268000 | H  | -3.63454200 | -1.04295000 | -3.52699300 |
| H | 2.62695400  | 2.87168000  | -0.58574400 | H  | -2.00315800 | -1.61791500 | -5.22705100 |
| H | 3.32039100  | 2.00758700  | 0.80322700  | H  | -3.49726800 | -1.95722600 | -6.12698000 |
| H | -2.05295600 | 1.79704100  | -2.61311500 | H  | -3.40597200 | -4.33373500 | -5.50608200 |
| C | -4.70352900 | -1.44420600 | -0.73556900 | H  | -1.69227900 | -3.98454500 | -5.81217200 |
| H | -3.87263100 | -1.96212500 | -0.24407700 | H  | -1.22108500 | -3.71509800 | -3.45410400 |
| H | -5.30803200 | -2.21279300 | -1.24450500 | H  | -2.51695800 | -4.93417900 | -3.34389800 |
| C | -5.58401000 | -0.77947300 | 0.34152300  | C  | -4.97876200 | -0.73670800 | -0.43957600 |
| H | -4.96948500 | -0.05285600 | 0.89007900  | O  | -3.55273300 | -0.78726900 | -0.70663900 |
| H | -6.38535900 | -0.20411500 | -0.14593100 | C  | -2.98624500 | 0.54693500  | -0.63248600 |
| C | -6.20526400 | -1.78253900 | 1.32150400  | C  | -4.17496200 | 1.48885100  | -0.79057800 |
| H | -5.40341900 | -2.35214200 | 1.81568800  | C  | -5.28713300 | 0.71603400  | -0.06512200 |
| H | -6.80052600 | -2.51869500 | 0.75986500  | H  | -5.50689600 | -1.04548500 | -1.34999100 |
| C | -7.09244300 | -1.12980800 | 2.38963100  | H  | -5.21018800 | -1.44748400 | 0.35983200  |
| H | -6.49732000 | -0.40308900 | 2.96104600  | H  | -2.49651900 | 0.67184600  | 0.34192700  |
| H | -7.88744900 | -0.55212400 | 1.89601800  | H  | -2.23215700 | 0.63456000  | -1.41775300 |
| C | -7.72387700 | -2.13892000 | 3.35305400  | H  | -3.98259600 | 2.47568600  | -0.35975500 |
| H | -8.34922300 | -1.63978900 | 4.10355500  | H  | -4.42155400 | 1.61648500  | -1.85136300 |
| H | -8.35822600 | -2.85761300 | 2.81820600  | H  | -5.20345400 | 0.85815400  | 1.01836000  |
| H | -6.95629000 | -2.71194000 | 3.88926800  | H  | -6.29412100 | 1.01388400  | -0.37164200 |
|   |             |             |             | C  | 1.99358400  | -0.90325000 | -3.46756200 |
|   |             |             |             | H  | 0.93172400  | -0.85268100 | -3.20004900 |
|   |             |             |             | H  | 2.30656800  | 0.13556400  | -3.67254700 |
|   |             |             |             | C  | 2.14310300  | -1.70717800 | -4.77836300 |
|   |             |             |             | H  | 1.42089100  | -1.32180100 | -5.51476800 |

**TS (5-6)c**

E= -1128.305337 H

C -3.81037500 -4.95085000 -0.10243400



|   |            |             |             |
|---|------------|-------------|-------------|
| H | 1.86225000 | -2.75401800 | -4.58905700 |
| C | 3.54534700 | -1.66250700 | -5.40083700 |
| H | 4.28044700 | -2.06610700 | -4.69088900 |
| H | 3.82938000 | -0.61235600 | -5.57081400 |
| C | 3.65560700 | -2.43316900 | -6.72331300 |
| H | 2.91929100 | -2.03730100 | -7.43816900 |
| H | 3.38137700 | -3.48463600 | -6.55403100 |
| C | 5.05286500 | -2.36837600 | -7.34690100 |
| H | 5.81030200 | -2.78465000 | -6.67028400 |
| H | 5.10079800 | -2.93390100 | -8.28580800 |
| H | 5.34211900 | -1.33302400 | -7.56897700 |
| H | 3.12912600 | -1.66692000 | 0.84694600  |

### 6c

E= -1018.826321 H

|    |             |             |             |
|----|-------------|-------------|-------------|
| C  | -2.23618800 | 0.59607300  | -2.04830900 |
| C  | -2.40641600 | -0.58569100 | -1.09537600 |
| H  | -1.48577200 | 0.38621900  | -2.82865800 |
| H  | -3.16343700 | 0.90514200  | -2.57517800 |
| Li | -0.63308900 | -1.33680400 | -0.07344000 |
| O  | 0.05680200  | -3.20514600 | -0.50552300 |
| O  | -0.68796600 | -1.41412700 | 1.95947900  |
| C  | 0.17274000  | -3.56134900 | -1.90384000 |
| C  | -0.71440000 | -4.78883300 | -2.08325300 |
| C  | -0.51536700 | -5.51205500 | -0.74259600 |
| C  | -0.42640000 | -4.34766300 | 0.24967000  |
| C  | -1.79160600 | -0.87313900 | 2.72274600  |
| C  | -1.14371800 | 0.00685000  | 3.78587700  |
| C  | 0.12251500  | -0.79683200 | 4.12132600  |
| C  | 0.52173700  | -1.37558000 | 2.75729000  |
| H  | -0.13908100 | -2.69764000 | -2.49733100 |
| H  | 1.22329500  | -3.79106900 | -2.13003800 |
| H  | -0.42418100 | -5.39167400 | -2.94906600 |
| H  | -1.75987200 | -4.48366200 | -2.20548700 |
| H  | -1.32979000 | -6.19938900 | -0.49551400 |
| H  | 0.42125700  | -6.08175600 | -0.75328900 |
| H  | 0.26569800  | -4.53861400 | 1.07625500  |
| H  | -1.40689800 | -4.09109900 | 0.66513400  |
| H  | -2.44208900 | -0.34167700 | 2.02513200  |
| H  | -2.35529600 | -1.69940700 | 3.17839200  |
| H  | -1.79536000 | 0.16851800  | 4.64976800  |
| H  | -0.88270900 | 0.98363100  | 3.36101400  |
| H  | 0.91969100  | -0.18935700 | 4.56004500  |
| H  | -0.11726800 | -1.60222400 | 4.82490400  |
| H  | 0.93343600  | -2.38843600 | 2.82625200  |
| H  | 1.24442300  | -0.73929600 | 2.23609100  |
| C  | -3.66574200 | -1.07288400 | -1.03620400 |
| H  | -4.48228600 | -0.62587700 | -1.64184600 |
| O  | 1.07738900  | -0.27934100 | -0.43528400 |
| C  | 2.40826900  | -0.81134700 | -0.64400700 |
| C  | 1.13158700  | 1.16311500  | -0.32864700 |

|   |             |             |             |
|---|-------------|-------------|-------------|
| C | 3.31586900  | 0.40053800  | -0.86943300 |
| H | 2.70076100  | -1.37813200 | 0.24863900  |
| H | 2.38160100  | -1.49511000 | -1.49722200 |
| C | 2.59905100  | 1.49897000  | -0.07023900 |
| H | 0.77922800  | 1.60517300  | -1.26905700 |
| H | 0.45718700  | 1.46989900  | 0.47607800  |
| H | 3.34588400  | 0.66355000  | -1.93328300 |
| H | 4.34088400  | 0.21653200  | -0.53410200 |
| H | 2.85629800  | 2.51115300  | -0.39619700 |
| H | 2.83194500  | 1.41245600  | 0.99794900  |
| C | -4.15203000 | -2.23065800 | -0.18832000 |
| H | -4.51600500 | -3.05100300 | -0.83323100 |
| H | -3.30758700 | -2.64233200 | 0.38352200  |
| C | -5.29188600 | -1.86547200 | 0.78211500  |
| H | -4.94124500 | -1.08296800 | 1.47120000  |
| H | -6.12032700 | -1.41725800 | 0.21260100  |
| C | -5.82243800 | -3.05841100 | 1.58835200  |
| H | -6.18445900 | -3.83182900 | 0.89371700  |
| H | -4.99241100 | -3.51821000 | 2.14695300  |
| C | -6.94609700 | -2.69686400 | 2.56832600  |
| H | -6.58054900 | -1.93790600 | 3.27530400  |
| H | -7.77085000 | -2.22473300 | 2.01524300  |
| C | -7.48255300 | -3.90052300 | 3.34890100  |
| H | -6.68903400 | -4.38113300 | 3.93594000  |
| H | -8.27711800 | -3.60583400 | 4.04562100  |
| H | -7.89895000 | -4.65977800 | 2.67431000  |
| H | -1.85890600 | 1.49090100  | -1.52633700 |

### 7a

E= -786.3575599 H

|    |             |             |             |
|----|-------------|-------------|-------------|
| C  | -2.14738300 | 4.44457700  | -3.43875300 |
| C  | -2.78114200 | 3.04915100  | -3.36322300 |
| C  | -2.11074700 | 2.12180100  | -2.34046800 |
| C  | -2.76196000 | 0.72939200  | -2.23551700 |
| C  | -2.04318100 | -0.20395000 | -1.27075300 |
| H  | -2.19987300 | 4.92103900  | -2.44801900 |
| H  | -1.07634200 | 4.34572100  | -3.67241000 |
| H  | -2.74136300 | 2.57889100  | -4.35777400 |
| H  | -3.84907900 | 3.15133300  | -3.11815100 |
| H  | -2.13151900 | 2.59949700  | -1.34921400 |
| H  | -1.04750600 | 2.00319200  | -2.59863100 |
| H  | -2.75990500 | 0.28863100  | -3.24735700 |
| H  | -3.83024600 | 0.86972300  | -1.96916100 |
| Li | -0.17233700 | -1.07984400 | -1.01116300 |
| O  | 0.27196800  | -2.92619700 | -1.46496700 |
| C  | 0.71223300  | -3.18077400 | -2.82689000 |
| C  | -0.13757300 | -4.34868900 | -3.32135100 |
| C  | -0.37514400 | -5.14191100 | -2.02726800 |
| C  | -0.55908200 | -4.02647600 | -1.00054000 |
| H  | 0.57748100  | -2.26267000 | -3.40820200 |
| H  | 1.77969800  | -3.43311700 | -2.80442200 |

|   |             |             |             |   |             |             |             |
|---|-------------|-------------|-------------|---|-------------|-------------|-------------|
| H | 0.36911100  | -4.92658600 | -4.09970900 | H | -2.55839200 | -2.97155000 | -2.37843400 |
| H | -1.08883700 | -3.98232700 | -3.72391000 | H | -1.01635400 | -3.85272100 | -2.23857200 |
| H | -1.24658700 | -5.80111000 | -2.07689000 | H | -2.57802000 | -5.70602500 | -2.04059600 |
| H | 0.50421900  | -5.74894300 | -1.78157400 | H | -3.75240300 | -4.70710600 | -1.15725600 |
| H | -0.23057400 | -4.29511400 | 0.00794700  | H | -2.59695900 | -5.85290100 | 0.68956900  |
| H | -1.59897100 | -3.68121200 | -0.95743800 | H | -1.03199800 | -5.69414800 | -0.13258100 |
| C | -2.78054300 | -0.64557300 | -0.22699000 | H | -0.90420000 | -3.71940800 | 1.24013400  |
| H | -2.37867400 | -1.31560800 | 0.54435900  | H | -2.67156000 | -3.49607600 | 1.22263100  |
| H | -3.83888500 | -0.37526200 | -0.05473200 | C | -3.40327200 | -0.06919500 | -2.24797800 |
| C | -2.80486400 | 5.36488000  | -4.47538700 | H | -3.89509100 | -0.97489500 | -1.87922000 |
| H | -3.87602900 | 5.46178900  | -4.24646400 | H | -3.93315700 | 0.41094900  | -3.09050100 |
| H | -2.74625600 | 4.89267700  | -5.46674700 | C | -0.40249100 | 6.59379800  | -1.44304500 |
| C | -2.17145300 | 6.75771100  | -4.53800600 | H | -0.97396400 | 6.88861100  | -2.33515400 |
| H | -1.10551500 | 6.69959900  | -4.79378200 | H | 0.62103700  | 6.39061400  | -1.79028400 |
| H | -2.65916800 | 7.38709300  | -5.29257500 | C | -0.37933300 | 7.75762900  | -0.44843200 |
| H | -2.25143400 | 7.27499200  | -3.57302300 | H | 0.21421000  | 7.51060400  | 0.44127900  |
| O | 1.38530300  | -0.33180700 | -0.16076000 | H | 0.05542400  | 8.65996800  | -0.89604900 |
| C | 2.51414700  | -1.08027200 | 0.36611600  | H | -1.39183800 | 8.01149700  | -0.10892800 |
| C | 1.50324900  | 1.06982100  | 0.20362700  | O | 0.70045700  | -1.05943900 | -0.28835300 |
| C | 3.48394000  | -0.03434300 | 0.91779800  | C | 1.47398400  | -2.17420200 | -0.80584500 |
| H | 2.14664900  | -1.74980700 | 1.15312000  | C | 1.53750000  | 0.12057200  | -0.20479600 |
| H | 2.93660000  | -1.68400300 | -0.44162700 | C | 2.87555500  | -1.62377600 | -1.09403100 |
| C | 2.53975700  | 1.10751600  | 1.32245800  | H | 1.48917500  | -2.95877600 | -0.04073300 |
| H | 1.83617200  | 1.63309600  | -0.67729400 | H | 0.97846700  | -2.56555800 | -1.69943300 |
| H | 0.51297800  | 1.42543400  | 0.49772500  | C | 2.96425000  | -0.41503600 | -0.15012200 |
| H | 4.17243500  | 0.30069300  | 0.13323000  | H | 1.37689800  | 0.73983200  | -1.09731000 |
| H | 4.07694600  | -0.42293200 | 1.75069500  | H | 1.22931100  | 0.67945200  | 0.67997800  |
| H | 3.03870100  | 2.07850700  | 1.39120900  | H | 2.94953700  | -1.29396200 | -2.13663100 |
| H | 2.06675200  | 0.89264700  | 2.28786500  | H | 3.65418100  | -2.37199500 | -0.91843700 |

### TS (7-8)a

E= -2501.318325 H

|    |             |             |             |   |             |             |            |
|----|-------------|-------------|-------------|---|-------------|-------------|------------|
| C  | -1.00355400 | 5.30751500  | -0.86090500 | O | -2.25927300 | 1.63137100  | 3.99547000 |
| C  | -1.04069900 | 4.14212000  | -1.85828500 | C | -1.00745900 | -0.57077100 | 4.83313000 |
| C  | -1.63523800 | 2.85025400  | -1.28099000 | N | -2.38334700 | -0.60608800 | 2.47951400 |
| C  | -1.70190000 | 1.69524900  | -2.29849700 | C | -0.11005100 | -1.61532900 | 4.58473000 |
| C  | -2.25835100 | 0.40521500  | -1.72062100 | C | -1.54446700 | -0.33417700 | 6.10051100 |
| H  | -2.02442500 | 5.51452200  | -0.50609200 | S | -4.13340400 | -0.77521600 | 2.74346900 |
| H  | -0.42788300 | 5.00940200  | 0.02824000  | F | -2.26506500 | -0.07358000 | 1.04575300 |
| H  | -0.01979300 | 3.94096900  | -2.21798700 | C | 0.24937900  | -2.44638500 | 5.64310600 |
| H  | -1.61960600 | 4.44475600  | -2.74407100 | H | 0.29790100  | -1.77249700 | 3.59172700 |
| H  | -2.64898200 | 3.05126200  | -0.90465200 | C | -1.16771900 | -1.17394300 | 7.14823800 |
| H  | -1.04550700 | 2.53224400  | -0.40957000 | H | -2.23445800 | 0.48593500  | 6.26187200 |
| H  | -0.67913400 | 1.52452400  | -2.67492000 | O | -4.20555700 | -1.09393100 | 4.17170500 |
| H  | -2.29307900 | 2.04064200  | -3.17196700 | O | -4.53414300 | -1.74810900 | 1.72923400 |
| Li | -1.26790600 | -0.98347900 | -0.41806300 | C | -4.94350300 | 0.77699800  | 2.41337700 |
| O  | -1.68992900 | -2.91257700 | -0.50610900 | C | -0.27767700 | -2.22592700 | 6.91972000 |
| C  | -1.96658700 | -3.62703600 | -1.73518200 | H | 0.94312000  | -3.26385900 | 5.47171300 |
| C  | -2.68401200 | -4.90272300 | -1.30535300 | H | -1.57119400 | -1.00446600 | 8.14191500 |
| C  | -2.00070900 | -5.20911300 | 0.03631600  | C | -5.17358500 | 1.15581900  | 1.08682700 |
| C  | -1.80825400 | -3.81144600 | 0.62906800  | C | -5.37549000 | 1.54789100  | 3.49648600 |

|   |             |             |             |
|---|-------------|-------------|-------------|
| H | 0.00879600  | -2.87742800 | 7.74033400  |
| C | -5.85212000 | 2.35020100  | 0.84910300  |
| H | -4.82840100 | 0.54549300  | 0.26020900  |
| C | -6.06093300 | 2.73315000  | 3.23624500  |
| H | -5.18520200 | 1.22460600  | 4.51286800  |
| C | -6.29494200 | 3.13377600  | 1.91813000  |
| H | -6.03561900 | 2.66315600  | -0.17425300 |
| H | -6.41077000 | 3.34249800  | 4.06417900  |
| H | -6.82740300 | 4.06048300  | 1.72315900  |

### 8a

E= -413.7212653 H

|   |             |             |             |
|---|-------------|-------------|-------------|
| C | -3.33152100 | 1.13004600  | 0.01651400  |
| C | -3.44521200 | -0.34685600 | -0.38305600 |
| C | -4.30326100 | -1.17187600 | 0.58322600  |
| C | -4.40410700 | -2.65389000 | 0.17114800  |
| C | -5.21643500 | -3.47351300 | 1.12069900  |
| H | -4.33904300 | 1.56737700  | 0.08251600  |
| H | -2.90115700 | 1.20056900  | 1.02665200  |
| H | -2.43838200 | -0.78659500 | -0.44014300 |
| H | -3.86870500 | -0.41803800 | -1.39591100 |
| H | -5.31495600 | -0.74644800 | 0.63647700  |
| H | -3.88370500 | -1.11049000 | 1.59554300  |
| H | -3.39176900 | -3.08051200 | 0.11774500  |
| H | -4.84473800 | -2.74173900 | -0.82804900 |
| C | -6.33445500 | -4.15745900 | 0.90008100  |
| H | -6.82363600 | -4.70970000 | 1.69631900  |
| H | -6.77613400 | -4.17518500 | -0.08991200 |
| C | -2.48303200 | 1.96265400  | -0.95341400 |
| H | -2.91827000 | 1.89946600  | -1.96118900 |
| H | -1.47826200 | 1.52203000  | -1.02634500 |
| C | -2.36366500 | 3.43312900  | -0.54280100 |
| H | -1.89038500 | 3.53439100  | 0.44239700  |
| H | -1.75913900 | 4.00143000  | -1.26024100 |
| H | -3.34938000 | 3.91281200  | -0.48637500 |
| F | -4.68663300 | -3.46923000 | 2.38187800  |

### NTs<sub>2</sub>F

E= -1714.955006 H

|   |             |            |             |
|---|-------------|------------|-------------|
| S | 1.46918000  | 3.36474200 | 0.19466900  |
| S | -1.30595900 | 4.74076700 | -0.30003200 |
| O | 1.91695200  | 4.30468800 | -0.83234200 |
| O | 1.90184500  | 1.97007800 | 0.20398600  |
| O | -0.76533300 | 5.84409000 | 0.49623600  |
| O | -2.65042900 | 4.22902200 | -0.04551200 |
| C | -1.06491700 | 5.05195400 | -2.03370300 |
| C | -1.61293100 | 4.15725900 | -2.95889000 |
| C | -0.38076600 | 6.20573300 | -2.42252100 |
| C | -1.45909900 | 4.43171500 | -4.31576500 |
| H | -2.14446800 | 3.27126100 | -2.62844000 |

|   |             |            |             |
|---|-------------|------------|-------------|
| C | -0.24288100 | 6.46545900 | -3.78559100 |
| H | 0.02993300  | 6.87997700 | -1.67986500 |
| C | -0.77706500 | 5.58154100 | -4.72616800 |
| H | -1.87355700 | 3.74899600 | -5.05118900 |
| H | 0.28352100  | 7.35786600 | -4.11011100 |
| H | -0.66283600 | 5.78976500 | -5.78618000 |
| C | 1.67736800  | 4.05167100 | 1.82354000  |
| C | 1.51672300  | 3.21759600 | 2.93572900  |
| C | 2.02720000  | 5.39938900 | 1.94547900  |
| C | 1.70340400  | 3.76244500 | 4.20457000  |
| H | 1.26286200  | 2.17075800 | 2.81509000  |
| C | 2.21975900  | 5.92187200 | 3.22329600  |
| H | 2.15259900  | 6.01751300 | 1.06456600  |
| C | 2.05303100  | 5.10832800 | 4.34696600  |
| H | 1.58075100  | 3.13312500 | 5.08074100  |
| H | 2.49969000  | 6.96455900 | 3.33871500  |
| H | 2.20038200  | 5.52396300 | 5.33969300  |
| N | -0.28818700 | 3.23380900 | -0.13483500 |
| F | -0.82143600 | 2.56006900 | 0.99203100  |

### NTs<sub>2</sub>Li(THF)<sub>2</sub>

E= -2087.791732 H

|    |             |             |             |
|----|-------------|-------------|-------------|
| Li | -1.32516800 | -1.14055500 | 1.13319800  |
| O  | -1.04430700 | -2.91279600 | 0.39229000  |
| C  | -0.91585600 | -3.13453300 | -1.04020100 |
| C  | -1.66853400 | -4.43351300 | -1.33239500 |
| C  | -1.53588100 | -5.19440000 | -0.00494700 |
| C  | -1.67184900 | -4.06874900 | 1.01441600  |
| H  | -1.32708700 | -2.26684900 | -1.56567700 |
| H  | 0.15116000  | -3.22008200 | -1.27598500 |
| H  | -1.24302000 | -4.96929900 | -2.18578500 |
| H  | -2.72282900 | -4.22529600 | -1.54732700 |
| H  | -2.29934000 | -5.96612800 | 0.12885800  |
| H  | -0.54883900 | -5.66534500 | 0.07398100  |
| H  | -1.16163900 | -4.25737000 | 1.96216900  |
| H  | -2.72353700 | -3.83281600 | 1.21707600  |
| O  | -0.03826100 | 0.09693200  | 0.36927600  |
| C  | 1.28173700  | -0.32555800 | -0.07654700 |
| C  | 0.02730200  | 1.45818900  | 0.87830400  |
| C  | 2.17111600  | 0.91639100  | 0.00876100  |
| H  | 1.63140900  | -1.12126300 | 0.59185000  |
| H  | 1.19119700  | -0.72678600 | -1.08998300 |
| C  | 1.50709300  | 1.71883100  | 1.13686200  |
| H  | -0.37696400 | 2.13579600  | 0.11530500  |
| H  | -0.59460500 | 1.51145500  | 1.77458500  |
| H  | 2.13597000  | 1.47865500  | -0.93145800 |
| H  | 3.21379200  | 0.65858100  | 0.21532500  |
| H  | 1.74980500  | 2.78515100  | 1.11136600  |
| H  | 1.79551500  | 1.32008800  | 2.11606600  |
| O  | 0.11231000  | -0.56826500 | 4.61750900  |

|   |             |             |            |    |             |             |             |
|---|-------------|-------------|------------|----|-------------|-------------|-------------|
| S | -1.32625900 | -0.88279000 | 4.66933800 | H  | -3.39710000 | 4.23482600  | -2.12402000 |
| O | -2.18653000 | -0.12635400 | 5.59999200 | H  | -2.80197900 | 5.16440400  | -0.75531600 |
| C | -1.45080300 | -2.62206300 | 5.12961400 | H  | -0.78268100 | 3.68802900  | -0.59903500 |
| N | -1.85242300 | -0.75786700 | 3.10679000 | H  | -1.26395700 | 2.85345600  | -2.05757400 |
| C | -0.38110800 | -3.47730800 | 4.85095800 | H  | -3.29658000 | 1.99212900  | -0.94185700 |
| C | -2.60285400 | -3.08859900 | 5.76617500 | H  | -1.31086600 | -0.89148000 | -1.19327100 |
| S | -3.42920400 | -0.60213400 | 2.69581100 | H  | 1.93525600  | 2.84391100  | 0.72602500  |
| C | -0.47389000 | -4.82324000 | 5.20981400 | H  | 3.57352900  | 4.00467500  | -0.72166200 |
| H | 0.51524300  | -3.08912200 | 4.37870000 | H  | 5.61454600  | 0.28393600  | -1.39662400 |
| C | -2.68491000 | -4.43651200 | 6.11956800 | H  | 3.95426600  | -0.87887900 | 0.04313200  |
| H | -3.41779000 | -2.40775400 | 5.98265800 | H  | 6.45631800  | 2.25446900  | -2.45763700 |
| O | -4.35595600 | -1.51125400 | 3.39416900 | H  | 5.22537300  | 3.45489700  | -2.88273200 |
| O | -3.32848200 | -0.72812900 | 1.20513300 | H  | 6.26015300  | 3.71862600  | -1.48084600 |
| C | -3.99213900 | 1.07846800  | 3.01618700 | Li | -1.15451600 | -1.51371300 | 0.82495700  |
| C | -1.62491400 | -5.30292000 | 5.84090900 | O  | -0.82480900 | -3.40690600 | 0.27146800  |
| H | 0.35628100  | -5.49324700 | 5.00366300 | O  | -1.84907200 | -1.71970200 | 2.67130500  |
| H | -3.57644700 | -4.80752800 | 6.61749800 | C  | 0.52764300  | -3.90603100 | 0.15434700  |
| C | -3.74112000 | 2.07695800  | 2.07120100 | C  | 0.65947100  | -4.30201200 | -1.31130300 |
| C | -4.67586100 | 1.35545400  | 4.20175200 | C  | -0.72758400 | -4.90226700 | -1.59941000 |
| H | -1.69265400 | -6.35049700 | 6.12159100 | C  | -1.66446400 | -4.06106600 | -0.71352100 |
| C | -4.17976600 | 3.37687000  | 2.32603300 | C  | -2.29954700 | -0.51239900 | 3.33723700  |
| H | -3.22796500 | 1.83853100  | 1.14590600 | C  | -1.38969400 | -0.35636200 | 4.55149600  |
| C | -5.10948700 | 2.65918600  | 4.44426400 | C  | -1.13898800 | -1.81996900 | 4.94669100  |
| H | -4.86300300 | 0.56557200  | 4.91912300 | C  | -1.04578000 | -2.51388000 | 3.58430900  |
| C | -4.86095200 | 3.66830000  | 3.51057400 | H  | 1.19654700  | -3.10790000 | 0.48384400  |
| H | -3.99497200 | 4.15902000  | 1.59502100 | H  | 0.64974700  | -4.77912700 | 0.81349200  |
| H | -5.64372900 | 2.88417200  | 5.36304500 | H  | 1.47772600  | -5.00768800 | -1.48574200 |
| H | -5.20164100 | 4.68175700  | 3.70420700 | H  | 0.83372200  | -3.41040900 | -1.92486200 |

## 9-NMe<sub>2</sub>

E= -1849.484089 H

|   |             |             |             |   |             |             |             |
|---|-------------|-------------|-------------|---|-------------|-------------|-------------|
| C | -1.69287700 | 5.48696000  | -2.57786300 | H | -1.00756500 | -4.85044900 | -2.65572800 |
| C | -2.47782900 | 4.57516300  | -1.62323300 | H | -0.75486400 | -5.95482200 | -1.29480900 |
| C | -1.66160700 | 3.35730500  | -1.16460900 | H | -2.41346000 | -4.67153800 | -0.19567200 |
| C | -2.42039300 | 2.27957100  | -0.34999100 | H | -2.18394200 | -3.27660300 | -1.27301200 |
| C | -1.55332200 | 1.01215000  | -0.22285300 | H | -2.23323800 | 0.31057900  | 2.62202000  |
| C | -2.06037400 | -0.21061700 | -0.77483800 | H | -3.35052700 | -0.64650200 | 3.63020800  |
| N | -0.42281000 | 1.17448700  | 0.43680900  | H | -1.85646700 | 0.23281300  | 5.34752500  |
| N | 0.26029800  | -0.08191600 | 0.59577200  | H | -0.45391300 | 0.12714700  | 4.25158300  |
| C | 2.84019500  | 0.90482800  | 0.46907900  | H | -0.22889000 | -1.95927700 | 5.53842100  |
| C | 2.73548100  | 2.28518300  | 0.25383000  | H | -1.98574700 | -2.21315900 | 5.52250900  |
| C | 3.66306600  | 2.93202200  | -0.55988800 | H | -1.43717000 | -3.53663600 | 3.59042800  |
| C | 4.71496500  | 2.22890100  | -1.17002300 | H | -0.01672000 | -2.52844900 | 3.20766600  |
| C | 4.80523100  | 0.85014100  | -0.93986200 | C | -2.48385600 | 6.70842800  | -3.06431500 |
| C | 3.87649800  | 0.18925900  | -0.13204500 | H | -2.81332600 | 7.29799700  | -2.19648800 |
| C | 5.71685900  | 2.94743800  | -2.04263200 | H | -3.40074100 | 6.37000000  | -3.56843200 |
| S | 1.59730300  | 0.04701400  | 1.47375200  | C | -1.68469900 | 7.60623000  | -4.01364600 |
| O | 1.50428600  | 0.87534900  | 2.71088500  | H | -1.37273000 | 7.05808800  | -4.91208500 |
| O | 2.12011300  | -1.33877300 | 1.66137000  | H | -2.27418300 | 8.47137400  | -4.34181500 |
| H | -0.77352800 | 5.82825600  | -2.07840000 | H | -0.77661600 | 7.98836800  | -3.52956900 |
| H | -1.36372400 | 4.90062400  | -3.44902800 | H | -2.93192400 | -0.11278900 | -1.42607300 |
|   |             |             |             | N | -2.97845000 | 2.70255200  | 0.96323200  |
|   |             |             |             | C | -4.32328800 | 3.25555900  | 0.92068100  |
|   |             |             |             | H | -4.74046100 | 3.27326900  | 1.93710500  |
|   |             |             |             | H | -4.39097300 | 4.28834900  | 0.52768300  |

|   |             |            |            |
|---|-------------|------------|------------|
| H | -4.97214700 | 2.62025000 | 0.30733200 |
| C | -2.09791300 | 3.48728100 | 1.81558600 |
| H | -1.11899300 | 3.00708200 | 1.86057000 |
| H | -1.96651000 | 4.53682600 | 1.48414900 |
| H | -2.51523500 | 3.52171000 | 2.83131500 |

### 10-NMe<sub>2</sub>

E= -1849.478312 H

|    |             |             |             |
|----|-------------|-------------|-------------|
| C  | -2.18734000 | 1.73526500  | -0.96459000 |
| C  | -1.41988300 | 0.44468000  | -0.65528500 |
| C  | -1.96911200 | -0.74998700 | -1.16620300 |
| N  | -0.34072400 | 0.75627000  | 0.08091100  |
| N  | 0.55784700  | -0.32608800 | 0.38182600  |
| C  | 2.85823900  | 1.10001400  | -0.15986200 |
| C  | 2.45125000  | 2.38015700  | -0.56147200 |
| C  | 3.13263100  | 3.03616900  | -1.58634300 |
| C  | 4.23162300  | 2.44510900  | -2.22896500 |
| C  | 4.63101500  | 1.16843200  | -1.80741900 |
| C  | 3.95017700  | 0.49732200  | -0.79018100 |
| C  | 4.94772300  | 3.15767400  | -3.35204200 |
| S  | 1.90258200  | 0.18906100  | 1.08298900  |
| O  | 1.74508700  | 1.16704500  | 2.20093100  |
| O  | 2.71631200  | -1.02257500 | 1.40116400  |
| H  | -2.10215700 | 2.02430600  | -2.02272100 |
| H  | -3.25940400 | 1.66691300  | -0.74029100 |
| H  | 1.61057900  | 2.85427000  | -0.06875800 |
| H  | 2.80829600  | 4.03012400  | -1.89008800 |
| H  | 5.48879300  | 0.69383300  | -2.28060600 |
| H  | 4.26476600  | -0.49102500 | -0.46994100 |
| H  | 5.92509100  | 2.70611000  | -3.55453800 |
| H  | 4.36917100  | 3.11743100  | -4.28548100 |
| H  | 5.10671300  | 4.21812200  | -3.12193200 |
| Li | -0.16907000 | -2.08975900 | 0.74543700  |
| O  | 0.78285200  | -3.89757000 | 0.89341700  |
| O  | -1.23269400 | -2.10301700 | 2.49654200  |
| C  | 2.18126300  | -4.07905900 | 0.60182700  |
| C  | 2.24263200  | -5.38960400 | -0.19295700 |
| C  | 1.01729200  | -6.19143100 | 0.32643800  |
| C  | 0.29542600  | -5.19764000 | 1.25990800  |
| C  | -1.76208500 | -0.79705100 | 2.85954700  |
| C  | -1.08649900 | -0.44186000 | 4.18062200  |
| C  | -0.95505000 | -1.81703700 | 4.85084400  |
| C  | -0.63952000 | -2.72943700 | 3.66186000  |
| H  | 2.52609600  | -3.18974500 | 0.07660600  |
| H  | 2.73562700  | -4.16116300 | 1.54780800  |
| H  | 3.19004300  | -5.91370700 | -0.03357300 |
| H  | 2.14671500  | -5.18997300 | -1.26485600 |
| H  | 0.37014500  | -6.49738000 | -0.50103800 |
| H  | 1.30965500  | -7.09495900 | 0.86983500  |
| H  | 0.54600000  | -5.39505500 | 2.31215400  |
| H  | -0.79127500 | -5.19134900 | 1.15384300  |

|   |             |             |             |
|---|-------------|-------------|-------------|
| H | -1.52833800 | -0.10276900 | 2.04891500  |
| H | -2.85178400 | -0.88291100 | 2.97259300  |
| H | -1.67333500 | 0.27133800  | 4.76849300  |
| H | -0.10096600 | -0.00526900 | 3.98408600  |
| H | -0.17282400 | -1.85673600 | 5.61541800  |
| H | -1.90425100 | -2.10721100 | 5.31735200  |
| H | -1.05905700 | -3.73565000 | 3.76931500  |
| H | 0.43970600  | -2.81536400 | 3.49287900  |
| C | -3.13267100 | -0.71605500 | -2.15407600 |
| H | -3.12880000 | 0.21276800  | -2.74379900 |
| H | -2.99999400 | -1.51160300 | -2.90648700 |
| C | -4.56119800 | -0.87064900 | -1.57215200 |
| H | -4.63870200 | -1.82628500 | -1.03504000 |
| H | -4.72424600 | -0.08954100 | -0.81544600 |
| C | -5.67302100 | -0.79195600 | -2.62751600 |
| H | -5.60256800 | 0.17005300  | -3.15879800 |
| H | -5.50877000 | -1.56948800 | -3.39028800 |
| C | -7.08768900 | -0.94510700 | -2.05253700 |
| H | -7.16255300 | -1.90799100 | -1.52630400 |
| H | -7.25371800 | -0.16973400 | -1.29061300 |
| C | -8.19142400 | -0.85929100 | -3.11112000 |
| H | -8.08163600 | -1.64745300 | -3.86749000 |
| H | -9.18750600 | -0.96704200 | -2.66362800 |
| H | -8.16620400 | 0.10504900  | -3.63503400 |
| H | -1.76582600 | 2.54834000  | -0.36600300 |
| N | -1.26732200 | -2.03997700 | -1.04627300 |
| C | -0.35392700 | -2.30332000 | -2.17154900 |
| H | 0.18997900  | -3.24494500 | -2.00831800 |
| H | -0.88021800 | -2.38458500 | -3.14045500 |
| H | 0.37478900  | -1.49286000 | -2.24020000 |
| C | -2.16388600 | -3.18907100 | -0.87602700 |
| H | -2.79132600 | -3.04204200 | 0.00894500  |
| H | -2.82920800 | -3.36850000 | -1.73914900 |
| H | -1.56907700 | -4.10105000 | -0.73822400 |

### 11-NMe<sub>2</sub>

E= -1849.466719 H

|   |             |             |             |
|---|-------------|-------------|-------------|
| C | -2.07332400 | 1.75347100  | -1.41766000 |
| C | -1.41373600 | 0.51700800  | -0.81922900 |
| C | -2.08095800 | -0.80885500 | -0.84002100 |
| N | -0.22798900 | 0.77450300  | -0.32063300 |
| N | 0.40596400  | -0.34355000 | 0.29011700  |
| C | 2.96935100  | 0.52974900  | -0.28743100 |
| C | 2.94046700  | 1.80786800  | -0.85697200 |
| C | 3.81039500  | 2.12236800  | -1.89920000 |
| C | 4.72711500  | 1.18018400  | -2.39272200 |
| C | 4.74671200  | -0.09108300 | -1.80360200 |
| C | 3.87413100  | -0.41997000 | -0.76381700 |
| C | 5.65956800  | 1.53470400  | -3.52693000 |
| S | 1.78514100  | 0.08673100  | 1.01211600  |
| O | 1.72844700  | 1.29671800  | 1.88128100  |

|    |             |             |             |
|----|-------------|-------------|-------------|
| O  | 2.32456700  | -1.14771400 | 1.65128900  |
| H  | -2.41805800 | 1.56830000  | -2.44322000 |
| H  | -2.95327300 | 2.08992100  | -0.85475900 |
| H  | 2.24674600  | 2.54976900  | -0.47741900 |
| H  | 3.78027500  | 3.11869700  | -2.33633200 |
| H  | 5.45468400  | -0.83553100 | -2.16205400 |
| H  | 3.89898000  | -1.40638400 | -0.31179700 |
| H  | 6.35007800  | 0.71451800  | -3.74930700 |
| H  | 5.10261200  | 1.75965100  | -4.44601000 |
| H  | 6.25857100  | 2.42403500  | -3.29272600 |
| Li | -1.01706900 | -1.57487900 | 1.03771600  |
| O  | -0.63114300 | -3.53194900 | 1.33213000  |
| O  | -1.54852800 | -1.08323200 | 2.93122000  |
| C  | 0.70090900  | -4.07701100 | 1.29658300  |
| C  | 0.64619600  | -5.10716700 | 0.17147500  |
| C  | -0.77464200 | -5.70067800 | 0.32139800  |
| C  | -1.54540800 | -4.62698900 | 1.12846700  |
| C  | -1.89940900 | 0.30538000  | 3.16325200  |
| C  | -0.99621800 | 0.78259200  | 4.30034600  |
| C  | -0.78482300 | -0.50862800 | 5.10521300  |
| C  | -0.68253000 | -1.55469700 | 3.99549500  |
| H  | 1.38727400  | -3.24292100 | 1.14224900  |
| H  | 0.92553800  | -4.55511900 | 2.26351700  |
| H  | 1.43416300  | -5.86234400 | 0.25456600  |
| H  | 0.75447200  | -4.60370400 | -0.79487900 |
| H  | -1.24039100 | -5.89148200 | -0.64957900 |
| H  | -0.75206300 | -6.64763700 | 0.87036000  |
| H  | -1.86684700 | -5.01391000 | 2.10528000  |
| H  | -2.41912800 | -4.22619600 | 0.60885300  |
| H  | -1.75098900 | 0.85646600  | 2.23140900  |
| H  | -2.96132300 | 0.35025100  | 3.43961100  |
| H  | -1.45475900 | 1.58879600  | 4.88181300  |
| H  | -0.04430300 | 1.13765700  | 3.89205800  |
| H  | 0.11048300  | -0.48612200 | 5.73447700  |
| H  | -1.65195100 | -0.71138700 | 5.74604800  |
| H  | -1.02471300 | -2.54941700 | 4.29667400  |
| H  | 0.33993800  | -1.62988200 | 3.60705700  |
| C  | -1.34778800 | -1.75531400 | -1.81457100 |
| H  | -0.32010800 | -1.87316500 | -1.44753600 |
| H  | -1.78764100 | -2.76345100 | -1.78973600 |
| C  | -1.24484400 | -1.31501600 | -3.29900300 |
| H  | -2.24511600 | -1.09903400 | -3.70240600 |
| H  | -0.68521600 | -0.36992700 | -3.34724200 |
| C  | -0.55652800 | -2.35329400 | -4.19515600 |
| H  | 0.44214500  | -2.57734100 | -3.78893000 |
| H  | -1.11879700 | -3.30003100 | -4.15439800 |
| C  | -0.41569500 | -1.91907600 | -5.66037500 |
| H  | -1.41155000 | -1.68916500 | -6.06700300 |
| H  | 0.15496600  | -0.98033900 | -5.70480600 |
| C  | 0.26329900  | -2.96801500 | -6.54648700 |
| H  | -0.30266500 | -3.90890300 | -6.55503600 |
| H  | 0.34891600  | -2.62381900 | -7.58494100 |

|   |             |             |             |
|---|-------------|-------------|-------------|
| H | 1.27569600  | -3.19604100 | -6.18851600 |
| H | -1.35293600 | 2.57873300  | -1.42813900 |
| N | -3.54764100 | -0.65430400 | -1.16350400 |
| C | -4.28748300 | -0.19774600 | 0.00458500  |
| H | -5.32107100 | 0.05759500  | -0.27396700 |
| H | -4.33024000 | -0.96600500 | 0.80896600  |
| H | -3.83125400 | 0.69420000  | 0.44016800  |
| C | -4.19573300 | -1.86602000 | -1.62960900 |
| H | -3.78371400 | -2.21302200 | -2.58121300 |
| H | -4.12416600 | -2.70832400 | -0.90231000 |
| H | -5.26467400 | -1.66964600 | -1.78746200 |

## 12-NMe<sub>2</sub>

E= -2786.847600 H

|   |             |             |             |
|---|-------------|-------------|-------------|
| C | -1.41467400 | 5.78208200  | -0.61953900 |
| C | -1.29811100 | 4.46841600  | -1.40568500 |
| C | -2.47265800 | 3.50045900  | -1.17598700 |
| C | -2.40041700 | 2.15077400  | -1.91461200 |
| C | -1.55957800 | 1.14782400  | -1.25292100 |
| N | -0.76435500 | 1.48798000  | -0.26224000 |
| N | 0.07675300  | 0.42464700  | 0.20281400  |
| C | 2.09718800  | 2.10183400  | 1.27972200  |
| C | 1.78548300  | 3.45316200  | 1.46077300  |
| C | 2.75317000  | 4.42824000  | 1.21791200  |
| C | 4.04391100  | 4.08256200  | 0.78891300  |
| C | 4.33423100  | 2.72279900  | 0.60418300  |
| C | 3.37235100  | 1.73875200  | 0.83822500  |
| C | 5.08351000  | 5.14731700  | 0.53192300  |
| S | 0.82053400  | 0.83598500  | 1.54870900  |
| O | -0.01198800 | 1.40882900  | 2.64884100  |
| O | 1.62130400  | -0.38190100 | 1.95852800  |
| H | -2.37509500 | 6.26943300  | -0.85290300 |
| H | -1.44464000 | 5.55778700  | 0.45741900  |
| H | -0.36433000 | 3.96572700  | -1.12931200 |
| H | -1.22558500 | 4.69919700  | -2.47871400 |
| H | -3.39095600 | 4.02502600  | -1.48423200 |
| H | -2.56516200 | 3.35599800  | -0.08093700 |
| H | 0.79965700  | 3.73225700  | 1.81629800  |
| H | 2.50536100  | 5.47563900  | 1.37851200  |
| H | 5.33091600  | 2.42835300  | 0.28190300  |
| H | 3.61739800  | 0.69046200  | 0.70013100  |
| H | 6.08114200  | 4.71236800  | 0.41090900  |
| H | 4.85770600  | 5.71590900  | -0.38030600 |
| H | 5.12669000  | 5.87113300  | 1.35468800  |
| O | 1.59228500  | -3.51684400 | 2.10299000  |
| O | 1.48559700  | -1.78581300 | 4.79819900  |
| C | 2.78700500  | -3.39862500 | 1.28851700  |
| C | 2.44127200  | -4.06874100 | -0.03813600 |
| C | 1.50207000  | -5.19665900 | 0.41404600  |
| C | 0.71388800  | -4.53070900 | 1.54431600  |
| C | 1.13955700  | -0.58068200 | 5.53474000  |

|    |             |             |             |
|----|-------------|-------------|-------------|
| C  | 2.44451000  | -0.09144100 | 6.16031300  |
| C  | 3.20184200  | -1.40688700 | 6.39494400  |
| C  | 2.82295100  | -2.21567200 | 5.15434300  |
| H  | 3.02052900  | -2.33563900 | 1.20004100  |
| H  | 3.61341500  | -3.91313300 | 1.79751500  |
| H  | 3.32916300  | -4.42891900 | -0.56652800 |
| H  | 1.91027500  | -3.36497900 | -0.68940800 |
| H  | 0.84676000  | -5.56094600 | -0.38272200 |
| H  | 2.08140400  | -6.04539900 | 0.79611200  |
| H  | 0.43428100  | -5.22347200 | 2.34435200  |
| H  | -0.18952100 | -4.03381600 | 1.17495400  |
| H  | 0.69335700  | 0.12986500  | 4.83396300  |
| H  | 0.40049500  | -0.84683800 | 6.30168000  |
| H  | 2.27421700  | 0.48110700  | 7.07696600  |
| H  | 2.99093100  | 0.54386600  | 5.45372700  |
| H  | 4.28395500  | -1.27540300 | 6.48798900  |
| H  | 2.83576000  | -1.90284200 | 7.30172200  |
| H  | 2.80134200  | -3.29663200 | 5.32314700  |
| H  | 3.49814200  | -2.00334500 | 4.31539100  |
| C  | -0.27328500 | 6.77085500  | -0.89313100 |
| H  | -0.26479600 | 7.02947700  | -1.96262900 |
| H  | 0.68738000  | 6.27509900  | -0.69252500 |
| C  | -0.36318000 | 8.05508900  | -0.06344900 |
| H  | -0.33147900 | 7.83614600  | 1.01176600  |
| H  | 0.46563100  | 8.73862700  | -0.28720800 |
| H  | -1.29900800 | 8.59464500  | -0.26051600 |
| C  | -1.59960800 | -0.28814500 | -1.74909900 |
| H  | -0.60125600 | -0.62210600 | -2.05963100 |
| H  | -1.90855100 | -0.97502200 | -0.94939200 |
| H  | -2.29331300 | -0.39261400 | -2.58269100 |
| Li | 0.85145800  | -1.84040300 | 2.89984700  |
| O  | -1.08763700 | -2.20144100 | 3.11201800  |
| C  | -1.56483800 | -3.09201700 | 4.14413200  |
| C  | -2.18355900 | -1.36375100 | 2.63890000  |
| C  | -2.81542600 | -2.41844000 | 4.70003700  |
| H  | -1.80489700 | -4.06882600 | 3.70018500  |
| H  | -0.75809200 | -3.22046600 | 4.86995000  |
| C  | -3.42181300 | -1.80154500 | 3.43015100  |
| H  | -1.90597200 | -0.32309700 | 2.82244200  |
| H  | -2.28905900 | -1.51106600 | 1.56035600  |
| H  | -2.53820400 | -1.63562500 | 5.41589300  |
| H  | -3.48411900 | -3.12499200 | 5.20119500  |
| H  | -4.09233700 | -0.96203500 | 3.63569200  |
| H  | -3.98654600 | -2.56022600 | 2.87584100  |
| Li | -1.33705500 | 2.18336900  | -3.96402500 |
| O  | -1.86727300 | 3.62432800  | -5.35946700 |
| O  | 0.67673400  | 2.30620200  | -4.07829700 |
| O  | -1.63230000 | 0.58151900  | -5.22679400 |
| C  | -2.33431800 | 4.97187100  | -5.10368800 |
| C  | -1.94974200 | 3.33600200  | -6.77738200 |
| C  | 1.59384900  | 1.66554500  | -3.14926600 |
| C  | 1.39312500  | 3.24654600  | -4.91349400 |

|   |             |             |             |
|---|-------------|-------------|-------------|
| C | -0.61530500 | -0.09718400 | -5.98073800 |
| C | -2.86299700 | -0.14971500 | -5.42034900 |
| C | -3.04479800 | 5.41309300  | -6.38204200 |
| H | -2.98264800 | 4.94709200  | -4.22477100 |
| H | -1.46885200 | 5.61152600  | -4.88695500 |
| C | -2.23962200 | 4.67320300  | -7.45945300 |
| H | -1.00783500 | 2.88021600  | -7.09514100 |
| H | -2.75984700 | 2.61571000  | -6.94232400 |
| C | 2.89083900  | 2.46746800  | -3.23674100 |
| H | 1.13437600  | 1.66747800  | -2.15945900 |
| H | 1.74302300  | 0.62694200  | -3.47304700 |
| C | 2.87574100  | 2.94703600  | -4.69532700 |
| H | 1.06645100  | 3.11053700  | -5.94864100 |
| H | 1.13930500  | 4.26576700  | -4.59689200 |
| C | -0.91607000 | -1.57814600 | -5.76330500 |
| H | -0.69529700 | 0.17441800  | -7.04518200 |
| H | 0.35092000  | 0.23581600  | -5.59901800 |
| C | -2.46205900 | -1.60916800 | -5.74472300 |
| H | -3.44350400 | -0.04286600 | -4.50307000 |
| H | -3.42213600 | 0.30397100  | -6.24981300 |
| H | -3.04037900 | 6.50025700  | -6.50411200 |
| H | -4.08666200 | 5.07103300  | -6.37917200 |
| H | -2.78315000 | 4.54755600  | -8.40075600 |
| H | -1.30539400 | 5.20696500  | -7.67076100 |
| H | 3.76735600  | 1.86265000  | -2.98648900 |
| H | 2.85748600  | 3.32188500  | -2.55200100 |
| H | 3.50447000  | 3.82486700  | -4.87275000 |
| H | 3.20798300  | 2.14530100  | -5.36622100 |
| H | -0.51159600 | -1.89818400 | -4.79741600 |
| H | -0.48508400 | -2.21253400 | -6.54381200 |
| H | -2.84503500 | -2.31090700 | -4.99857600 |
| H | -2.86243400 | -1.90837100 | -6.71853600 |
| N | -3.74397600 | 1.59055700  | -2.23528100 |
| C | -4.60631000 | 1.33680900  | -1.07989600 |
| H | -4.05139800 | 0.78464700  | -0.31413400 |
| H | -5.00298500 | 2.25700600  | -0.60525000 |
| H | -5.47532500 | 0.72903000  | -1.37475600 |
| C | -4.49274400 | 2.31570200  | -3.24522400 |
| H | -4.85698700 | 3.31161100  | -2.91355100 |
| H | -3.87651200 | 2.47316900  | -4.13601200 |
| H | -5.38657500 | 1.74453100  | -3.53952100 |

### 9-OMe

E= -1830.047772 H

|   |             |             |             |
|---|-------------|-------------|-------------|
| C | -1.45686400 | 5.97749200  | -1.61363100 |
| C | -2.27376900 | 4.73331600  | -1.24145800 |
| C | -1.40282300 | 3.51542300  | -0.90832700 |
| C | -2.20698800 | 2.26501800  | -0.54120900 |
| C | -1.35497700 | 0.99534100  | -0.39603400 |
| C | -1.91225800 | -0.24692100 | -0.83972500 |
| N | -0.20531500 | 1.17965300  | 0.22557200  |

|    |             |             |             |
|----|-------------|-------------|-------------|
| N  | 0.46044600  | -0.07305700 | 0.44829200  |
| C  | 3.03018900  | 0.84480000  | 0.03616100  |
| C  | 3.01379700  | 2.22671900  | -0.18765100 |
| C  | 3.85878800  | 2.78409000  | -1.14579400 |
| C  | 4.73838000  | 1.98677700  | -1.89572200 |
| C  | 4.74514500  | 0.60665600  | -1.65249000 |
| C  | 3.89734900  | 0.03607300  | -0.70078400 |
| C  | 5.64763800  | 2.60624300  | -2.93092200 |
| S  | 1.86515500  | 0.10157900  | 1.21046600  |
| O  | 1.88110200  | 1.03611000  | 2.37316700  |
| O  | 2.37796200  | -1.27372700 | 1.47434000  |
| H  | -0.78641800 | 6.23504600  | -0.77991800 |
| H  | -0.80297900 | 5.74189500  | -2.46716600 |
| H  | -2.94679500 | 4.48227700  | -2.07630600 |
| H  | -2.91906300 | 4.95944900  | -0.38293400 |
| H  | -0.72646700 | 3.74676700  | -0.07792100 |
| H  | -0.76519000 | 3.27079100  | -1.76810100 |
| H  | -2.94893400 | 2.08550900  | -1.33650300 |
| H  | -1.20121300 | -0.99962600 | -1.19434100 |
| H  | 2.35190200  | 2.85872000  | 0.39416200  |
| H  | 3.83890400  | 3.85954000  | -1.31253000 |
| H  | 5.42406700  | -0.03168200 | -2.21442300 |
| H  | 3.91143800  | -1.03375900 | -0.51787000 |
| H  | 6.29699400  | 1.85569300  | -3.39381500 |
| H  | 5.07223400  | 3.08873700  | -3.73179400 |
| H  | 6.28997800  | 3.37985900  | -2.49087700 |
| Li | -1.05443900 | -1.31870100 | 0.95258000  |
| O  | -0.92533900 | -3.30476200 | 0.73948300  |
| O  | -1.70890700 | -1.15604300 | 2.81976700  |
| C  | 0.36002900  | -3.91823300 | 0.48059100  |
| C  | 0.20760200  | -4.56583800 | -0.89070800 |
| C  | -1.23897800 | -5.08469900 | -0.83043400 |
| C  | -1.95644100 | -4.00649900 | -0.00251300 |
| C  | -1.91949100 | 0.18583500  | 3.33624600  |
| C  | -0.94138400 | 0.32931100  | 4.49845300  |
| C  | -0.91478700 | -1.09770100 | 5.06692700  |
| C  | -0.98721300 | -1.95058800 | 3.79797500  |
| H  | 1.11491800  | -3.13123700 | 0.54403100  |
| H  | 0.56152000  | -4.67268700 | 1.25576900  |
| H  | 0.94227700  | -5.35809700 | -1.06546100 |
| H  | 0.31737600  | -3.81019400 | -1.67748100 |
| H  | -1.69396000 | -5.21346800 | -1.81697400 |
| H  | -1.27222100 | -6.05062100 | -0.31308600 |
| H  | -2.67974600 | -4.42544200 | 0.70634600  |
| H  | -2.46960400 | -3.26866500 | -0.62849200 |
| H  | -1.74625300 | 0.89296300  | 2.52148000  |
| H  | -2.96261600 | 0.26791100  | 3.67232700  |
| H  | -1.26821200 | 1.08018000  | 5.22520900  |
| H  | 0.04512200  | 0.61017200  | 4.11436600  |
| H  | -0.01727800 | -1.31452200 | 5.65465500  |
| H  | -1.79179400 | -1.27639100 | 5.70106900  |
| H  | -1.52159700 | -2.89592300 | 3.93651300  |

|   |             |             |             |
|---|-------------|-------------|-------------|
| H | 0.01101400  | -2.16417400 | 3.39843100  |
| C | -2.31866600 | 7.19793800  | -1.96248200 |
| H | -2.96748200 | 7.43920100  | -1.10801400 |
| H | -2.99141600 | 6.94106800  | -2.79384300 |
| C | -1.49497700 | 8.43271500  | -2.33939300 |
| H | -0.86438300 | 8.23783900  | -3.21655800 |
| H | -2.13876000 | 9.28868100  | -2.57750500 |
| H | -0.83242700 | 8.73429700  | -1.51786700 |
| H | -2.79848000 | -0.17515200 | -1.47322200 |
| O | -2.93771900 | 2.58157900  | 0.66686600  |
| C | -4.12866000 | 1.83837200  | 0.82738700  |
| H | -4.58256700 | 2.15462600  | 1.77330000  |
| H | -4.84580400 | 2.04130900  | 0.01290600  |
| H | -3.94806200 | 0.75448400  | 0.86034300  |

### 10-OMe

E= -1830.04252 H

|    |             |             |             |
|----|-------------|-------------|-------------|
| C  | -2.18112700 | 1.87489400  | -1.39140700 |
| C  | -1.41752500 | 0.60409600  | -1.01037300 |
| C  | -2.04551600 | -0.61570200 | -1.29080100 |
| N  | -0.26943900 | 0.93001400  | -0.39338400 |
| N  | 0.50925300  | -0.19956600 | 0.05765300  |
| C  | 2.98344500  | 0.98607300  | -0.29662600 |
| C  | 2.72688100  | 2.25279800  | -0.84196300 |
| C  | 3.59586800  | 2.78905800  | -1.79061600 |
| C  | 4.73945900  | 2.09149200  | -2.21215500 |
| C  | 4.98316800  | 0.83012400  | -1.65204200 |
| C  | 4.11411400  | 0.27732100  | -0.70869700 |
| C  | 5.67334400  | 2.68838800  | -3.23873400 |
| S  | 1.81242400  | 0.24154500  | 0.87200100  |
| O  | 1.63267500  | 1.29507900  | 1.91556900  |
| O  | 2.46819000  | -1.01696600 | 1.34320100  |
| H  | -2.37944700 | 1.94214800  | -2.47008400 |
| H  | -3.15156300 | 1.95128400  | -0.88193500 |
| H  | 1.85018000  | 2.80609400  | -0.52494800 |
| H  | 3.38652300  | 3.77206500  | -2.20945200 |
| H  | 5.86746500  | 0.27278800  | -1.95560800 |
| H  | 4.31090800  | -0.69996700 | -0.27946000 |
| H  | 6.54688900  | 2.04862000  | -3.40310400 |
| H  | 5.17351900  | 2.82332400  | -4.20717600 |
| H  | 6.03580500  | 3.67684700  | -2.92843600 |
| Li | -0.45602600 | -1.81851600 | 0.64592700  |
| O  | 0.10686500  | -3.72082400 | 0.98540200  |
| O  | -1.52927700 | -1.47352800 | 2.32795800  |
| C  | 1.46947000  | -4.18149400 | 1.08962000  |
| C  | 1.57361300  | -5.28228100 | 0.03969100  |
| C  | 0.20209000  | -5.97310000 | 0.16519800  |
| C  | -0.73884400 | -4.83183600 | 0.60665400  |
| C  | -1.86565900 | -0.07410500 | 2.54263100  |
| C  | -1.23981600 | 0.28973000  | 3.88615100  |
| C  | -1.35907300 | -1.03003700 | 4.66271900  |



|   |             |             |             |
|---|-------------|-------------|-------------|
| C | -1.08603600 | -2.06860600 | 3.57212500  |
| H | 2.11148200  | -3.31360700 | 0.93094900  |
| H | 1.64623400  | -4.57987100 | 2.10082400  |
| H | 2.41209700  | -5.96158200 | 0.22207100  |
| H | 1.69914200  | -4.83887100 | -0.95479800 |
| H | -0.12656700 | -6.43816300 | -0.76887900 |
| H | 0.23988700  | -6.75402800 | 0.93250800  |
| H | -1.36113900 | -5.12058700 | 1.46276800  |
| H | -1.39515000 | -4.47891400 | -0.19421600 |
| H | -1.46508500 | 0.49912100  | 1.70295600  |
| H | -2.96039400 | 0.01804400  | 2.56665700  |
| H | -1.75474400 | 1.12519000  | 4.37185000  |
| H | -0.19020800 | 0.56408100  | 3.73536000  |
| H | -0.65219100 | -1.11375500 | 5.49434900  |
| H | -2.37360800 | -1.14937900 | 5.06287000  |
| H | -1.62841000 | -3.00847800 | 3.72127900  |
| H | -0.01597000 | -2.29197500 | 3.48986500  |
| C | -3.36460700 | -0.81260600 | -1.98645900 |
| H | -3.76480200 | 0.15233000  | -2.32071000 |
| H | -3.24089600 | -1.41104300 | -2.91265600 |
| C | -4.45233200 | -1.51974600 | -1.14281600 |
| H | -4.04404400 | -2.46997600 | -0.76997500 |
| H | -4.66463900 | -0.90659800 | -0.25409200 |
| C | -5.75670800 | -1.79012400 | -1.90468600 |
| H | -6.17011800 | -0.83714200 | -2.27065900 |
| H | -5.53741000 | -2.38808600 | -2.80318400 |
| C | -6.82429600 | -2.51259600 | -1.07234800 |
| H | -6.41747000 | -3.46955100 | -0.71411700 |
| H | -7.04489900 | -1.92042700 | -0.17231100 |
| C | -8.12394600 | -2.76961300 | -1.84065900 |
| H | -7.94499700 | -3.38830800 | -2.72978900 |
| H | -8.86390800 | -3.28938500 | -1.21914400 |
| H | -8.57844400 | -1.82968500 | -2.17985600 |
| H | -1.58042100 | 2.74195200  | -1.10170100 |
| O | -1.36940900 | -1.87262200 | -1.08823400 |
| C | -0.53053200 | -2.23563200 | -2.18456800 |
| H | -0.19832900 | -3.27006800 | -2.03141200 |
| H | -1.07951500 | -2.18081200 | -3.13431900 |
| H | 0.34688400  | -1.57941400 | -2.23400500 |

## 11-OMe

E= -1830.03475 H

|   |             |             |             |
|---|-------------|-------------|-------------|
| C | -2.19707800 | 1.69651600  | -1.12945000 |
| C | -1.38693100 | 0.46924500  | -0.74725400 |
| C | -1.99486500 | -0.86118300 | -0.85774300 |
| N | -0.20759100 | 0.75918600  | -0.24592300 |
| N | 0.49515300  | -0.38427900 | 0.24927200  |
| C | 3.03843100  | 0.56401300  | -0.29002400 |
| C | 2.89010500  | 1.81187500  | -0.90933100 |
| C | 3.76871200  | 2.19114700  | -1.92164000 |
| C | 4.81335500  | 1.34804000  | -2.33543200 |

|    |             |             |             |
|----|-------------|-------------|-------------|
| C  | 4.94819800  | 0.10689000  | -1.70029600 |
| C  | 4.06875000  | -0.28798800 | -0.68904600 |
| C  | 5.75477400  | 1.77263500  | -3.43752500 |
| S  | 1.86333000  | 0.04024300  | 0.98879800  |
| O  | 1.78647800  | 1.21275900  | 1.90727700  |
| O  | 2.42960800  | -1.20918200 | 1.57426600  |
| H  | -2.53734800 | 1.65228500  | -2.17204600 |
| H  | -3.10162400 | 1.79496400  | -0.51483900 |
| H  | 2.09070400  | 2.47497000  | -0.59817500 |
| H  | 3.64521200  | 3.16191500  | -2.39819200 |
| H  | 5.75413000  | -0.56095500 | -1.99784100 |
| H  | 4.18185000  | -1.24975100 | -0.19932600 |
| H  | 6.56699200  | 1.05037000  | -3.57133900 |
| H  | 5.23025500  | 1.86453800  | -4.39789400 |
| H  | 6.20581500  | 2.75070300  | -3.22733700 |
| Li | -0.94950200 | -1.59265600 | 1.02170900  |
| O  | -0.60239100 | -3.55243200 | 1.30179200  |
| O  | -1.54826900 | -1.10064500 | 2.88034800  |
| C  | 0.72534200  | -4.11101400 | 1.24320800  |
| C  | 0.63558400  | -5.15891100 | 0.13965800  |
| C  | -0.76538400 | -5.76102300 | 0.37562600  |
| C  | -1.55128300 | -4.61199300 | 1.04927100  |
| C  | -1.89991900 | 0.29110100  | 3.10318500  |
| C  | -1.01201300 | 0.76810100  | 4.25182200  |
| C  | -0.82101800 | -0.52055600 | 5.06585800  |
| C  | -0.70398100 | -1.57171900 | 3.96283800  |
| H  | 1.41441400  | -3.28466600 | 1.05967600  |
| H  | 0.97048800  | -4.57471700 | 2.21190700  |
| H  | 1.43497200  | -5.90426400 | 0.19944000  |
| H  | 0.68986900  | -4.67145100 | -0.83971200 |
| H  | -1.24004400 | -6.09203900 | -0.55253900 |
| H  | -0.70423800 | -6.62491400 | 1.04613300  |
| H  | -2.00119200 | -4.92815700 | 1.99937100  |
| H  | -2.33856600 | -4.19628400 | 0.41511600  |
| H  | -1.73521700 | 0.83903800  | 2.17213400  |
| H  | -2.96558000 | 0.33800200  | 3.36429800  |
| H  | -1.47465800 | 1.57977200  | 4.82226000  |
| H  | -0.05161600 | 1.11476500  | 3.85639200  |
| H  | 0.06311100  | -0.50004400 | 5.71066900  |
| H  | -1.70040600 | -0.71691900 | 5.69177800  |
| H  | -1.05558300 | -2.56394900 | 4.26087100  |
| H  | 0.32547100  | -1.65363300 | 3.59389000  |
| C  | -1.29995300 | -1.85060500 | -1.80201100 |
| H  | -0.26925000 | -2.01323300 | -1.46077400 |
| H  | -1.81007200 | -2.82631500 | -1.73828600 |
| C  | -1.25148700 | -1.44611400 | -3.29420600 |
| H  | -2.27217000 | -1.22359600 | -3.63579900 |
| H  | -0.67682600 | -0.51298900 | -3.39305100 |
| C  | -0.63327400 | -2.51665000 | -4.20329200 |
| H  | 0.38559100  | -2.74666000 | -3.85428400 |
| H  | -1.20549400 | -3.45280700 | -4.10391900 |
| C  | -0.57775000 | -2.12057100 | -5.68496400 |

|   |             |             |             |   |             |             |             |
|---|-------------|-------------|-------------|---|-------------|-------------|-------------|
| H | -1.59439500 | -1.88939000 | -6.03554300 | C | 1.09809800  | -1.12521900 | 6.19386400  |
| H | -0.00182600 | -1.18958200 | -5.78786200 | C | 2.42187300  | -1.18628800 | 6.95707200  |
| C | 0.03573400  | -3.19894600 | -6.58354100 | C | 2.80399400  | -2.66835600 | 6.82612400  |
| H | -0.53447600 | -4.13557800 | -6.52760300 | C | 2.34820700  | -2.98277600 | 5.40296900  |
| H | 0.05461300  | -2.88534900 | -7.63499000 | H | 2.78324600  | -2.18841200 | 1.54597500  |
| H | 1.06836900  | -3.42433100 | -6.28687200 | H | 3.09693000  | -3.89354500 | 1.97687200  |
| H | -1.59134800 | 2.59818500  | -0.98774700 | H | 2.90011800  | -4.11001600 | -0.43497300 |
| O | -3.38165200 | -0.74561700 | -1.31365800 | H | 1.68263200  | -2.81776800 | -0.51504700 |
| C | -4.32081800 | -0.90697500 | -0.28746700 | H | 0.26302100  | -4.82589400 | -0.53185500 |
| H | -4.22892500 | -0.14427400 | 0.50635800  | H | 1.30792100  | -5.63051100 | 0.65632600  |
| H | -5.32487100 | -0.81316500 | -0.72974900 | H | -0.31911300 | -4.70710400 | 2.17672200  |
| H | -4.24896600 | -1.89590800 | 0.20003800  | H | -0.61849500 | -3.30149300 | 1.12472300  |

## 12-OMe

E= -2767.411117 H

|   |             |             |             |    |             |             |             |
|---|-------------|-------------|-------------|----|-------------|-------------|-------------|
| C | -1.42956700 | 5.88006600  | -0.47467200 | H  | 0.92769300  | -0.17047100 | 5.68991200  |
| C | -0.81453000 | 4.62733600  | -1.11311600 | H  | 0.24350100  | -1.34413800 | 6.84639200  |
| C | -1.81410100 | 3.46458100  | -1.27469600 | H  | 2.31610700  | -0.85395200 | 7.99403900  |
| C | -1.23754100 | 2.19615800  | -1.87392400 | H  | 3.17317700  | -0.55495200 | 6.46879100  |
| C | -0.61370300 | 1.23604300  | -1.00999100 | H  | 3.87207100  | -2.85614600 | 6.97048200  |
| N | -0.27676600 | 1.57748000  | 0.22461500  | H  | 2.24592300  | -3.27484600 | 7.54950300  |
| N | 0.48641500  | 0.56969900  | 0.89968800  | H  | 2.06952800  | -4.02886200 | 5.24737200  |
| C | 2.46289400  | 2.23998700  | 2.00055900  | H  | 3.11740800  | -2.70959300 | 4.66880900  |
| C | 2.21593800  | 3.61190700  | 1.89578900  | C  | -0.45952300 | 7.06354400  | -0.36114800 |
| C | 3.25648200  | 4.48336100  | 1.56490500  | H  | -0.07813400 | 7.31762700  | -1.36110500 |
| C | 4.55477800  | 4.01178700  | 1.33259600  | H  | 0.41621400  | 6.75891500  | 0.22957700  |
| C | 4.78414500  | 2.62984300  | 1.44483000  | C  | -1.08965700 | 8.30806300  | 0.27165900  |
| C | 3.75263500  | 1.74980800  | 1.76367800  | H  | -1.44505100 | 8.09982100  | 1.28911100  |
| C | 5.67491200  | 4.95223200  | 0.95684800  | H  | -0.37189000 | 9.13558600  | 0.33463200  |
| S | 1.07811900  | 1.10110100  | 2.27697500  | H  | -1.95046200 | 8.65944700  | -0.31231400 |
| O | 0.16379300  | 1.86012700  | 3.17947000  | C  | -0.28355700 | -0.13854900 | -1.56965700 |
| O | 1.72497700  | -0.10252900 | 2.93325700  | H  | 0.79665300  | -0.32733600 | -1.52733900 |
| H | -2.30836900 | 6.19390900  | -1.06097800 | H  | -0.75412400 | -0.93518900 | -0.97809300 |
| H | -1.80889100 | 5.62912100  | 0.52737300  | H  | -0.61430900 | -0.23297400 | -2.60678300 |
| H | 0.02772800  | 4.27893200  | -0.50274500 | Li | 0.64772600  | -1.62412800 | 3.31637900  |
| H | -0.40091500 | 4.88454200  | -2.09983300 | O  | -1.33578900 | -1.63877400 | 3.44445600  |
| H | -2.63651200 | 3.81059600  | -1.92010400 | C  | -2.04708400 | -2.54489800 | 4.30704200  |
| H | -2.25771400 | 3.27957800  | -0.27491400 | C  | -2.27853900 | -0.67698600 | 2.88983500  |
| H | 1.22136400  | 3.99485700  | 2.09753100  | C  | -3.16952300 | -1.70008900 | 4.89848700  |
| H | 3.05566100  | 5.55051700  | 1.49581500  | H  | -2.44921900 | -3.38351100 | 3.71830300  |
| H | 5.78723200  | 2.24012100  | 1.28186100  | H  | -1.33213700 | -2.93246600 | 5.03610400  |
| H | 3.94546400  | 0.68462500  | 1.84429500  | C  | -3.58657700 | -0.84362800 | 3.68891000  |
| H | 6.60387300  | 4.70261800  | 1.48337900  | H  | -1.82425700 | 0.30951600  | 2.99507500  |
| H | 5.89369800  | 4.90284000  | -0.11880700 | H  | -2.41240100 | -0.88780500 | 1.82357400  |
| H | 5.42142600  | 5.99166300  | 1.19105800  | H  | -2.77723500 | -1.07020800 | 5.70528100  |
| O | 1.13962400  | -3.23368300 | 2.22813500  | H  | -3.98787500 | -2.30591400 | 5.29978600  |
| O | 1.17324300  | -2.16571900 | 5.18237200  | H  | -4.01071100 | 0.12152200  | 3.98032900  |
| C | 2.38993100  | -3.20615200 | 1.49297600  | H  | -4.33757600 | -1.37281400 | 3.09193700  |
| C | 2.04289400  | -3.66470800 | 0.07902800  | Li | -1.26477200 | 1.86719200  | -4.60465800 |
| C | 0.90378400  | -4.66162100 | 0.33960800  | O  | -2.40495700 | 3.04335500  | -5.79459800 |
| C | 0.14812400  | -3.99382500 | 1.49028300  | O  | 0.60479800  | 2.43594100  | -5.10604000 |
|   |             |             |             | O  | -1.36495900 | 0.09889400  | -5.59649500 |
|   |             |             |             | C  | -2.69656900 | 4.43029100  | -5.48112000 |
|   |             |             |             | C  | -3.46936800 | 2.48703200  | -6.60467300 |
|   |             |             |             | C  | 1.74173300  | 2.15384900  | -4.24348500 |

|   |             |             |             |
|---|-------------|-------------|-------------|
| C | 0.92750500  | 3.51882000  | -6.01143800 |
| C | -0.51242700 | -0.22776600 | -6.71579000 |
| C | -2.18624500 | -1.04847600 | -5.25900000 |
| C | -4.13670100 | 4.66901100  | -5.93659500 |
| H | -2.54586600 | 4.58018900  | -4.40849600 |
| H | -1.98941500 | 5.06461200  | -6.02981700 |
| C | -4.26954500 | 3.68583600  | -7.10905600 |
| H | -3.01729900 | 1.89033300  | -7.40139100 |
| H | -4.08754900 | 1.83040200  | -5.97888400 |
| C | 2.72336500  | 3.30249200  | -4.46687600 |
| H | 1.36652100  | 2.08465700  | -3.21934800 |
| H | 2.16976700  | 1.18855100  | -4.54377100 |
| C | 2.44369500  | 3.68991600  | -5.92637000 |
| H | 0.56929000  | 3.25162800  | -7.01002900 |
| H | 0.40623100  | 4.42538700  | -5.67949000 |
| C | -0.37152500 | -1.74508700 | -6.66974900 |
| H | -0.99242100 | 0.09944100  | -7.64982300 |
| H | 0.42166600  | 0.32169700  | -6.58579200 |
| C | -1.77929700 | -2.17115400 | -6.22475000 |
| H | -1.98611000 | -1.30727800 | -4.21449100 |
| H | -3.24174900 | -0.77226000 | -5.35525800 |
| H | -4.31261800 | 5.71078700  | -6.22029000 |
| H | -4.84013500 | 4.40767000  | -5.13744100 |
| H | -5.30610800 | 3.42398300  | -7.34128900 |
| H | -3.80787900 | 4.10150900  | -8.01274600 |
| H | 3.75971700  | 3.00124700  | -4.28750300 |
| H | 2.48802300  | 4.13814400  | -3.79748800 |
| H | 2.75802600  | 4.70819000  | -6.17506700 |
| H | 2.94745300  | 2.99702600  | -6.61119000 |
| H | 0.37578100  | -2.03240400 | -5.92078400 |
| H | -0.07694000 | -2.16931100 | -7.63431000 |
| H | -1.80188800 | -3.15327200 | -5.74377800 |
| H | -2.45545100 | -2.20072900 | -7.08684000 |
| C | -3.32999500 | 1.05990800  | -2.44588100 |
| H | -3.14819200 | 0.22322300  | -1.75767200 |
| H | -3.94461900 | 1.80915900  | -1.92893300 |
| H | -3.88720300 | 0.69193900  | -3.31547300 |
| O | -2.10362100 | 1.62304700  | -2.90659400 |

## 12-H

E= -2652.897666 H

|   |             |            |             |
|---|-------------|------------|-------------|
| C | -1.74339600 | 5.51574600 | -0.52990600 |
| C | -1.31413000 | 4.28465000 | -1.33939800 |
| C | -2.39208200 | 3.18656200 | -1.43125700 |
| C | -2.00900100 | 1.93375100 | -2.21832700 |
| C | -1.21650600 | 0.93359900 | -1.53576200 |
| N | -0.54381800 | 1.21503700 | -0.43945000 |
| N | 0.22913300  | 0.10867000 | 0.05709200  |
| C | 2.32776200  | 1.66522300 | 1.13807800  |
| C | 2.11678700  | 3.03280500 | 1.34352800  |
| C | 3.13966100  | 3.94308600 | 1.07770100  |

|   |             |             |             |
|---|-------------|-------------|-------------|
| C | 4.38957900  | 3.51567400  | 0.60460200  |
| C | 4.57997400  | 2.14131400  | 0.39661200  |
| C | 3.56036000  | 1.22238900  | 0.65062000  |
| C | 5.49413800  | 4.51028900  | 0.33557300  |
| S | 0.96888200  | 0.48544500  | 1.40739400  |
| O | 0.16190100  | 1.12879800  | 2.49023700  |
| O | 1.68242900  | -0.77492300 | 1.85209200  |
| H | -2.65772600 | 5.94662200  | -0.96939100 |
| H | -2.01696900 | 5.20204600  | 0.48891100  |
| H | -0.41536200 | 3.84818400  | -0.88737900 |
| H | -1.03204400 | 4.60023100  | -2.35591900 |
| H | -3.29286300 | 3.63574000  | -1.88217100 |
| H | -2.67095900 | 2.93394300  | -0.38818400 |
| H | 1.16412700  | 3.37337600  | 1.73416000  |
| H | 2.96773300  | 5.00365900  | 1.25197500  |
| H | 5.54271700  | 1.78404400  | 0.03683100  |
| H | 3.72703900  | 0.16212200  | 0.48745000  |
| H | 6.41475800  | 4.01005100  | 0.01757300  |
| H | 5.21101800  | 5.22069100  | -0.45199800 |
| H | 5.72620300  | 5.10311600  | 1.22948700  |
| O | 1.71280600  | -3.72668100 | 2.79530500  |
| O | 1.49483500  | -1.47465000 | 5.02860500  |
| C | 2.89344700  | -3.81257500 | 1.95588300  |
| C | 2.55433300  | -4.84169400 | 0.88092400  |
| C | 1.64570900  | -5.81304800 | 1.64873900  |
| C | 0.84709800  | -4.86545900 | 2.54529400  |
| C | 1.09164800  | -0.19327100 | 5.58454400  |
| C | 2.36691000  | 0.42272500  | 6.15575600  |
| C | 3.14896800  | -0.82039200 | 6.60535500  |
| C | 2.82274600  | -1.82105700 | 5.49599400  |
| H | 3.09434600  | -2.81256400 | 1.56626400  |
| H | 3.74058600  | -4.13949900 | 2.57393500  |
| H | 3.44725400  | -5.31812700 | 0.46508100  |
| H | 2.00187000  | -4.36542500 | 0.06236000  |
| H | 0.99704300  | -6.40725300 | 0.99836000  |
| H | 2.24748600  | -6.50118600 | 2.25428600  |
| H | 0.57080500  | -5.30657100 | 3.50821200  |
| H | -0.06083500 | -4.50455900 | 2.04949600  |
| H | 0.63855400  | 0.39277400  | 4.78119600  |
| H | 0.34747900  | -0.37552800 | 6.37141500  |
| H | 2.15933200  | 1.12350500  | 6.97000000  |
| H | 2.91434700  | 0.95768300  | 5.37081200  |
| H | 4.22499900  | -0.64671800 | 6.70068500  |
| H | 2.77215400  | -1.18150000 | 7.56987700  |
| H | 2.80880200  | -2.86167600 | 5.83411200  |
| H | 3.52412400  | -1.73324500 | 4.65645100  |
| C | -0.66834200 | 6.60736900  | -0.44544200 |
| H | -0.39317400 | 6.92533800  | -1.46220700 |
| H | 0.24388800  | 6.18081300  | -0.00380600 |
| C | -1.10116100 | 7.83223500  | 0.36588600  |
| H | -1.34210700 | 7.55925500  | 1.40145100  |
| H | -0.31116300 | 8.59318200  | 0.39869300  |

|    |             |             |             |
|----|-------------|-------------|-------------|
| H  | -1.99460200 | 8.30192900  | -0.06634300 |
| C  | -1.16543800 | -0.45978900 | -2.14687900 |
| H  | -0.13502900 | -0.75788500 | -2.37956800 |
| H  | -1.54590800 | -1.21433500 | -1.44591600 |
| H  | -1.75584100 | -0.50845000 | -3.06678500 |
| Li | 0.92370000  | -1.92134500 | 3.16582900  |
| O  | -1.03163300 | -2.24040900 | 3.34126900  |
| C  | -1.60242100 | -2.79298700 | 4.54691600  |
| C  | -2.06908900 | -1.56345300 | 2.57074200  |
| C  | -2.86539900 | -1.97510700 | 4.79605200  |
| H  | -1.84239400 | -3.85375800 | 4.38452400  |
| H  | -0.84905000 | -2.71765200 | 5.33483700  |
| C  | -3.36944200 | -1.74563400 | 3.36273900  |
| H  | -1.77582300 | -0.51568400 | 2.47678800  |
| H  | -2.10600600 | -2.01139000 | 1.57321900  |
| H  | -2.61099200 | -1.02145100 | 5.27342400  |
| H  | -3.58611700 | -2.49944900 | 5.43103500  |
| H  | -4.02723400 | -0.87653800 | 3.27084200  |
| H  | -3.91881400 | -2.62654700 | 3.01066000  |
| Li | -1.14465200 | 2.21954100  | -4.26811500 |
| O  | -1.88621500 | 3.73593700  | -5.42363200 |
| O  | 0.84224300  | 2.39668700  | -4.43858900 |
| O  | -1.63235300 | 0.70869700  | -5.53498600 |
| C  | -2.57111800 | 4.92030900  | -4.94318900 |
| C  | -1.89826700 | 3.71487800  | -6.87272900 |
| C  | 1.74123500  | 2.02740600  | -3.35878900 |
| C  | 1.50547600  | 3.31985300  | -5.33762200 |
| C  | -0.72342100 | -0.23196200 | -6.15814000 |
| C  | -2.99945900 | 0.28078500  | -5.73152000 |
| C  | -3.33195400 | 5.47190800  | -6.14682800 |
| H  | -3.21437100 | 4.62766900  | -4.10973500 |
| H  | -1.82473900 | 5.63721800  | -4.57764600 |
| C  | -2.40133800 | 5.09193600  | -7.30719000 |
| H  | -0.88832300 | 3.48904800  | -7.22694600 |
| H  | -2.57243300 | 2.91710200  | -7.20661700 |
| C  | 2.80526100  | 3.11891600  | -3.33972200 |
| H  | 1.15279800  | 1.95172600  | -2.44226400 |
| H  | 2.18117200  | 1.04635400  | -3.58517600 |
| C  | 2.94687900  | 3.44812800  | -4.83335300 |
| H  | 1.44342200  | 2.92489500  | -6.35747200 |
| H  | 0.97248900  | 4.27676100  | -5.29868500 |
| C  | -1.58846700 | -1.40008000 | -6.63948800 |
| H  | -0.22440200 | 0.27463400  | -6.99381100 |
| H  | 0.03266200  | -0.52692300 | -5.42510200 |
| C  | -2.94848900 | -0.72607200 | -6.87805300 |
| H  | -3.36849300 | -0.18302400 | -4.80754300 |
| H  | -3.60415400 | 1.16741800  | -5.94217100 |
| H  | -3.51108200 | 6.54813100  | -6.06611800 |
| H  | -4.30041100 | 4.96822500  | -6.25139400 |
| H  | -2.90504200 | 5.05979000  | -8.27795400 |
| H  | -1.56802500 | 5.80135300  | -7.37568300 |
| H  | 3.73745800  | 2.77906200  | -2.87980100 |

|   |             |             |             |
|---|-------------|-------------|-------------|
| H | 2.44364400  | 3.99043700  | -2.78202600 |
| H | 3.36063700  | 4.44300300  | -5.02363200 |
| H | 3.59267500  | 2.71099400  | -5.32490200 |
| H | -1.67434200 | -2.16084300 | -5.85506500 |
| H | -1.17607400 | -1.87647500 | -7.53385100 |
| H | -3.78906200 | -1.42591700 | -6.85350400 |
| H | -2.95818300 | -0.20850100 | -7.84479400 |
| H | -2.87961800 | 1.47005200  | -2.70628900 |

## 9-Ph

E= -1946.584794 H

|    |             |             |             |
|----|-------------|-------------|-------------|
| C  | -1.71305000 | 5.47488900  | -2.51232100 |
| C  | -2.55288100 | 4.32622700  | -1.93741600 |
| C  | -1.70395800 | 3.15887100  | -1.41639600 |
| C  | -2.52095800 | 1.98661800  | -0.81544100 |
| C  | -1.62633900 | 0.76886400  | -0.49934800 |
| C  | -2.08651500 | -0.53298100 | -0.89245000 |
| N  | -0.53457000 | 1.04906000  | 0.18155200  |
| N  | 0.17299100  | -0.14868700 | 0.53539800  |
| C  | 2.69304600  | 0.98968600  | 0.45186700  |
| C  | 2.58844000  | 2.36289700  | 0.20036700  |
| C  | 3.50857600  | 2.98527200  | -0.64151500 |
| C  | 4.55055600  | 2.26270500  | -1.24476200 |
| C  | 4.64264600  | 0.89070300  | -0.97532400 |
| C  | 3.72227300  | 0.25515100  | -0.13925600 |
| C  | 5.54133500  | 2.95239000  | -2.15258200 |
| S  | 1.44681300  | 0.15169700  | 1.46849700  |
| O  | 1.22472400  | 1.08359700  | 2.61178100  |
| O  | 2.03620000  | -1.17474900 | 1.81734000  |
| H  | -1.01854100 | 5.83622900  | -1.73883500 |
| H  | -1.08412100 | 5.09595700  | -3.33206400 |
| H  | -3.24516200 | 3.96024600  | -2.71148800 |
| H  | -3.18257800 | 4.71673600  | -1.12614600 |
| H  | -0.99443200 | 3.52434800  | -0.66512000 |
| H  | -1.09453600 | 2.76061600  | -2.23938100 |
| H  | -3.23002300 | 1.66488600  | -1.58893400 |
| H  | -1.30133200 | -1.23131100 | -1.20453100 |
| H  | 1.79620800  | 2.93700800  | 0.66832300  |
| H  | 3.41905100  | 4.05300200  | -0.83290800 |
| H  | 5.44542700  | 0.31030200  | -1.42568400 |
| H  | 3.80132400  | -0.80765000 | 0.06534200  |
| H  | 6.25816100  | 2.24123700  | -2.57636800 |
| H  | 5.03628800  | 3.45638900  | -2.98649700 |
| H  | 6.11189600  | 3.72175500  | -1.61578200 |
| Li | -1.15108500 | -1.65073900 | 0.83855100  |
| O  | -0.68392800 | -3.55274600 | 0.39720700  |
| O  | -1.82762600 | -1.83658500 | 2.69803000  |
| C  | 0.70776400  | -3.93330600 | 0.30588700  |
| C  | 0.89149100  | -4.34147900 | -1.15082700 |
| C  | -0.43127200 | -5.07252400 | -1.44128700 |
| C  | -1.45067900 | -4.31897300 | -0.56605500 |

|   |             |             |             |
|---|-------------|-------------|-------------|
| C | -2.30314400 | -0.62301100 | 3.33977800  |
| C | -1.48185800 | -0.48018700 | 4.62008900  |
| C | -1.19951500 | -1.94491300 | 4.98687200  |
| C | -0.98034300 | -2.57907500 | 3.61328200  |
| H | 1.30018000  | -3.07386300 | 0.62749100  |
| H | 0.89771200  | -4.78048800 | 0.98261000  |
| H | 1.77289000  | -4.97176300 | -1.30509800 |
| H | 0.98950100  | -3.44816600 | -1.77835000 |
| H | -0.70779900 | -5.05366200 | -2.49957900 |
| H | -0.36071300 | -6.12097700 | -1.13011500 |
| H | -2.12376800 | -4.99728400 | -0.02849500 |
| H | -2.05686400 | -3.60914200 | -1.13707800 |
| H | -2.17109000 | 0.20650600  | 2.64147500  |
| H | -3.37405200 | -0.74328200 | 3.55017500  |
| H | -2.02328000 | 0.06520300  | 5.39958500  |
| H | -0.54793700 | 0.04933300  | 4.40436000  |
| H | -0.33040300 | -2.06921700 | 5.64031700  |
| H | -2.06977600 | -2.39305600 | 5.48203800  |
| H | -1.26900300 | -3.63355900 | 3.56667900  |
| H | 0.06007500  | -2.47609100 | 3.28321800  |
| C | -2.55246900 | 6.65284400  | -3.02386000 |
| H | -3.18921600 | 7.02418800  | -2.20786800 |
| H | -3.23782200 | 6.29688500  | -3.80684000 |
| C | -1.70855600 | 7.80666400  | -3.57327600 |
| H | -1.07732600 | 7.47668800  | -4.40860000 |
| H | -2.33843500 | 8.62749400  | -3.93830000 |
| H | -1.04467200 | 8.21678700  | -2.80117800 |
| H | -2.92961000 | -0.54371900 | -1.58741300 |
| C | -3.35858600 | 2.43542000  | 0.37995200  |
| C | -4.75961000 | 2.44686900  | 0.30601800  |
| C | -2.76009900 | 2.87074900  | 1.57511000  |
| C | -5.54178200 | 2.87456700  | 1.38316800  |
| H | -5.24519100 | 2.11392600  | -0.60926800 |
| C | -3.53706200 | 3.30015900  | 2.65286600  |
| H | -1.67805700 | 2.84040200  | 1.65714400  |
| C | -4.93252900 | 3.30602700  | 2.56271900  |
| H | -6.62628800 | 2.86956200  | 1.29834900  |
| H | -3.05012200 | 3.63023200  | 3.56795100  |
| H | -5.53628200 | 3.64091700  | 3.40291400  |

## 10-Ph

E= -1946.587866 H

|   |             |             |             |
|---|-------------|-------------|-------------|
| C | -1.55517100 | 1.62138900  | -2.43835500 |
| C | -0.91070400 | 0.42777600  | -1.73615800 |
| C | -1.44596400 | -0.92122800 | -1.95415600 |
| N | 0.08335900  | 0.80512700  | -0.96308500 |
| N | 0.63204700  | -0.19319700 | -0.14107900 |
| C | 3.18844500  | 0.87326500  | -0.11646700 |
| C | 3.20776200  | 2.10046700  | -0.78988700 |
| C | 4.29615700  | 2.42988200  | -1.59528600 |
| C | 5.38316100  | 1.55382400  | -1.74602000 |

|    |             |             |             |
|----|-------------|-------------|-------------|
| C  | 5.34567000  | 0.33215900  | -1.06113000 |
| C  | 4.25788600  | -0.01228600 | -0.25568800 |
| C  | 6.55491400  | 1.92631300  | -2.62299200 |
| S  | 1.74585900  | 0.40124100  | 0.87118300  |
| O  | 1.36649100  | 1.64738900  | 1.59468900  |
| O  | 2.17715100  | -0.74578500 | 1.71621900  |
| H  | -1.71188000 | 1.44071500  | -3.51055900 |
| H  | -2.53410300 | 1.88328600  | -2.01307300 |
| H  | 2.38004900  | 2.79156900  | -0.67458900 |
| H  | 4.30477900  | 3.38589200  | -2.11546500 |
| H  | 6.17899900  | -0.36055000 | -1.15766100 |
| H  | 4.23802300  | -0.95961200 | 0.27352900  |
| H  | 7.32912600  | 1.15223000  | -2.60599800 |
| H  | 6.24455100  | 2.06593400  | -3.66666700 |
| H  | 7.01479300  | 2.86860200  | -2.29881600 |
| Li | -0.51652000 | -1.70078400 | 0.38492000  |
| O  | -0.00415800 | -3.52366000 | 0.90610600  |
| O  | -1.67681600 | -1.20245200 | 1.96149000  |
| C  | 1.38282700  | -3.95334500 | 0.93316700  |
| C  | 1.34420900  | -5.46199000 | 0.69923300  |
| C  | 0.00837600  | -5.85389800 | 1.34869800  |
| C  | -0.88421700 | -4.67070400 | 0.97304900  |
| C  | -2.23589500 | 0.13864800  | 1.97882300  |
| C  | -1.77206300 | 0.76993900  | 3.29098500  |
| C  | -1.66422200 | -0.45246200 | 4.21461800  |
| C  | -1.11339000 | -1.51343300 | 3.26383600  |
| H  | 1.92157300  | -3.39673400 | 0.16477000  |
| H  | 1.80421400  | -3.70162300 | 1.91305600  |
| H  | 2.20686600  | -5.97050800 | 1.14086700  |
| H  | 1.32548300  | -5.67805900 | -0.37492800 |
| H  | -0.39123400 | -6.80489000 | 0.98351300  |
| H  | 0.11754000  | -5.92168900 | 2.43793300  |
| H  | -1.66824800 | -4.46140300 | 1.70785000  |
| H  | -1.34795700 | -4.81336100 | -0.01019600 |
| H  | -1.87814300 | 0.66654500  | 1.09217600  |
| H  | -3.32943600 | 0.05555600  | 1.93268300  |
| H  | -2.47215100 | 1.52917300  | 3.65389300  |
| H  | -0.79025000 | 1.23399700  | 3.15043000  |
| H  | -1.00683300 | -0.29046000 | 5.07453300  |
| H  | -2.65423000 | -0.74457800 | 4.58644200  |
| H  | -1.40586500 | -2.53479000 | 3.52533400  |
| H  | -0.02142100 | -1.45922600 | 3.19230400  |
| C  | -2.93709000 | -1.04298900 | -2.27293800 |
| H  | -3.35127700 | -0.05489700 | -2.51009400 |
| H  | -3.09161100 | -1.64409500 | -3.18613900 |
| C  | -3.83651600 | -1.64345800 | -1.16770600 |
| H  | -3.45027100 | -2.62929100 | -0.87024500 |
| H  | -3.76955300 | -1.00958400 | -0.27271500 |
| C  | -5.30909200 | -1.78242200 | -1.57849900 |
| H  | -5.70247300 | -0.79313200 | -1.85993500 |
| H  | -5.37902900 | -2.40360900 | -2.48481000 |
| C  | -6.20150900 | -2.38670200 | -0.48625800 |

|   |             |             |             |
|---|-------------|-------------|-------------|
| H | -5.81744400 | -3.38100600 | -0.21499500 |
| H | -6.12566400 | -1.77360100 | 0.42363800  |
| C | -7.67222700 | -2.50558900 | -0.89713100 |
| H | -7.78618400 | -3.13656900 | -1.78818200 |
| H | -8.27963700 | -2.94811500 | -0.09770200 |
| H | -8.09992800 | -1.52252700 | -1.13305500 |
| H | -0.90923100 | 2.49714400  | -2.32022100 |
| C | -0.59871200 | -2.01720100 | -2.35202300 |
| C | -1.12883700 | -3.31377200 | -2.67876500 |
| C | 0.81970600  | -1.89745900 | -2.55774500 |
| C | -0.33582000 | -4.35678500 | -3.15024500 |
| H | -2.19239400 | -3.49896800 | -2.56025300 |
| C | 1.59837900  | -2.94768600 | -3.02803300 |
| H | 1.28853500  | -0.93835500 | -2.37737100 |
| C | 1.04495100  | -4.20263400 | -3.33199600 |
| H | -0.81022100 | -5.30988600 | -3.38537600 |
| H | 2.66449400  | -2.77778600 | -3.17902900 |
| H | 1.66152900  | -5.01756700 | -3.70336900 |

## 11-Ph

E= -1946.589343 H

|    |             |             |             |
|----|-------------|-------------|-------------|
| C  | -1.74407800 | 1.94288900  | -1.74001400 |
| C  | -1.13615700 | 0.71267300  | -1.08039300 |
| C  | -1.80531400 | -0.60718800 | -1.20035000 |
| N  | 0.03738800  | 0.93154100  | -0.55079400 |
| N  | 0.62555800  | -0.18990200 | 0.06833600  |
| C  | 3.22282000  | 0.63226300  | -0.44195700 |
| C  | 3.23185500  | 1.91358300  | -1.00497800 |
| C  | 4.13508000  | 2.21434600  | -2.02236900 |
| C  | 5.04596400  | 1.25587800  | -2.49549800 |
| C  | 5.02580400  | -0.01797900 | -1.91237800 |
| C  | 4.12056900  | -0.33410100 | -0.89694800 |
| C  | 6.01782700  | 1.59801500  | -3.59971400 |
| S  | 2.00416000  | 0.20852400  | 0.82812300  |
| O  | 1.93143600  | 1.41514300  | 1.69746500  |
| O  | 2.49034300  | -1.04116800 | 1.47317800  |
| H  | -1.69217700 | 1.85537900  | -2.83571000 |
| H  | -2.80310900 | 2.06745800  | -1.49152300 |
| H  | 2.54156600  | 2.66706200  | -0.64201400 |
| H  | 4.13614000  | 3.21257900  | -2.45577700 |
| H  | 5.72779100  | -0.77479600 | -2.25591600 |
| H  | 4.11434800  | -1.32251700 | -0.44882000 |
| H  | 6.66792300  | 0.74996800  | -3.83836800 |
| H  | 5.49245600  | 1.88601300  | -4.51942900 |
| H  | 6.65932700  | 2.44447500  | -3.32242600 |
| Li | -0.86482300 | -1.29676100 | 0.83142200  |
| O  | -0.74133100 | -3.23819100 | 1.18879800  |
| O  | -1.55413000 | -0.62645200 | 2.55638100  |
| C  | 0.52264200  | -3.89244000 | 1.41448000  |
| C  | 0.56684000  | -4.98244800 | 0.34513600  |
| C  | -0.91327900 | -5.42638200 | 0.23581400  |

|   |             |             |             |
|---|-------------|-------------|-------------|
| C | -1.70361300 | -4.27093000 | 0.89603900  |
| C | -1.40552300 | 0.74373800  | 3.00456600  |
| C | -1.45774600 | 0.67025400  | 4.52810300  |
| C | -2.45232700 | -0.47894100 | 4.75324300  |
| C | -2.09449800 | -1.44560900 | 3.62076600  |
| H | 1.30133200  | -3.13058100 | 1.33843100  |
| H | 0.53178300  | -4.32337600 | 2.42780000  |
| H | 1.23798700  | -5.80373100 | 0.61450500  |
| H | 0.91260500  | -4.55548100 | -0.60187900 |
| H | -1.21139200 | -5.57772400 | -0.80552700 |
| H | -1.08980800 | -6.36453300 | 0.77135200  |
| H | -2.17505600 | -4.59596300 | 1.83351500  |
| H | -2.46997000 | -3.83097300 | 0.25426000  |
| H | -0.46314000 | 1.12366700  | 2.60425400  |
| H | -2.23683700 | 1.33950800  | 2.60457200  |
| H | -1.77660100 | 1.61481000  | 4.97937300  |
| H | -0.47103900 | 0.41048100  | 4.93033400  |
| H | -2.36242300 | -0.94717400 | 5.73827200  |
| H | -3.48124400 | -0.11832600 | 4.63794700  |
| H | -2.95728100 | -1.99780900 | 3.23516000  |
| H | -1.32517700 | -2.16422900 | 3.92764100  |
| C | -1.06473100 | -1.62801100 | -2.06528100 |
| H | 0.00234600  | -1.61462000 | -1.80719900 |
| H | -1.41011900 | -2.64966200 | -1.83775100 |
| C | -1.17949800 | -1.41679600 | -3.59477500 |
| H | -2.23917100 | -1.40324800 | -3.88902000 |
| H | -0.77972600 | -0.42350500 | -3.84572400 |
| C | -0.43815000 | -2.47807500 | -4.41922400 |
| H | 0.62194800  | -2.49177100 | -4.12236700 |
| H | -0.83472500 | -3.47536700 | -4.17141700 |
| C | -0.53154300 | -2.26594400 | -5.93610600 |
| H | -1.58954600 | -2.25353800 | -6.23614300 |
| H | -0.13267200 | -1.27251600 | -6.18714900 |
| C | 0.21300400  | -3.33089200 | -6.74734900 |
| H | -0.18786200 | -4.33402400 | -6.55119100 |
| H | 0.13058100  | -3.14635000 | -7.82587500 |
| H | 1.28127200  | -3.34771700 | -6.49508300 |
| H | -1.20863000 | 2.85268700  | -1.44486700 |
| C | -3.21521500 | -0.74803900 | -0.99029000 |
| C | -3.99349400 | -1.83501700 | -1.52487200 |
| C | -3.97329300 | 0.15828400  | -0.16516400 |
| C | -5.35485600 | -1.98063000 | -1.27004500 |
| H | -3.51225900 | -2.56193400 | -2.17290400 |
| C | -5.33335700 | 0.00859200  | 0.06609600  |
| H | -3.44963500 | 0.97911700  | 0.31879400  |
| C | -6.06025600 | -1.06315100 | -0.48052100 |
| H | -5.88146000 | -2.82529400 | -1.71508600 |
| H | -5.84042500 | 0.73673400  | 0.69955200  |
| H | -7.12460600 | -1.17820100 | -0.29243600 |

## 12-Ph

E= -2883.955789 H

|   |             |             |             |    |             |             |             |
|---|-------------|-------------|-------------|----|-------------|-------------|-------------|
| C | -1.14250300 | 5.64425000  | -0.74142300 | H  | 2.95870100  | 0.48979900  | 5.71975700  |
| C | -1.08450000 | 4.28007200  | -1.44294600 | H  | 4.13031400  | -1.37216600 | 6.82327800  |
| C | -2.31840500 | 3.40392000  | -1.16283900 | H  | 2.61238100  | -1.97022000 | 7.52433600  |
| C | -2.34893100 | 1.99882000  | -1.78522600 | H  | 2.68603200  | -3.34088600 | 5.53014000  |
| C | -1.43629800 | 1.02805700  | -1.16927900 | H  | 3.48147600  | -2.05306700 | 4.59099200  |
| N | -0.74568400 | 1.36865900  | -0.10633900 | C  | 0.04511200  | 6.56087000  | -1.06422100 |
| N | 0.16956500  | 0.37694500  | 0.34002600  | H  | 0.07615100  | 6.74729400  | -2.14820800 |
| C | 2.13233000  | 2.11632100  | 1.39759500  | H  | 0.98042800  | 6.03823100  | -0.81780400 |
| C | 1.82383600  | 3.45428800  | 1.64884300  | C  | 0.00200700  | 7.89991000  | -0.32186100 |
| C | 2.76032200  | 4.45002100  | 1.35671400  | H  | 0.00989300  | 7.75117200  | 0.76572900  |
| C | 4.01039800  | 4.13410100  | 0.80935000  | H  | 0.86328100  | 8.53068000  | -0.57607700 |
| C | 4.30139600  | 2.78135600  | 0.56389800  | H  | -0.90632700 | 8.46503800  | -0.56894300 |
| C | 3.37388400  | 1.78080500  | 0.84483300  | C  | -1.19415500 | -0.32370800 | -1.82805000 |
| C | 5.01442800  | 5.21077000  | 0.47462600  | H  | -0.12522000 | -0.43878100 | -2.04941300 |
| S | 0.89035900  | 0.82574300  | 1.69430200  | H  | -1.45066500 | -1.15951500 | -1.16416600 |
| O | 0.02940400  | 1.38396500  | 2.77670200  | H  | -1.75585200 | -0.43043900 | -2.75672800 |
| O | 1.71642800  | -0.36755600 | 2.11901900  | Li | 0.89635800  | -1.84525100 | 3.01293700  |
| H | -2.07733600 | 6.16056400  | -1.01290000 | O  | -1.05230400 | -2.21696500 | 3.14534100  |
| H | -1.19019500 | 5.48771500  | 0.34672700  | C  | -1.58606900 | -3.07023500 | 4.18091900  |
| H | -0.18508200 | 3.74694100  | -1.11518300 | C  | -2.13611600 | -1.46292300 | 2.52501800  |
| H | -0.98110300 | 4.43635200  | -2.52619000 | C  | -2.89226300 | -2.40546700 | 4.60115400  |
| H | -3.20696600 | 3.96550600  | -1.47671800 | H  | -1.76605600 | -4.07465800 | 3.77100700  |
| H | -2.40156500 | 3.31357600  | -0.06487500 | H  | -0.83630500 | -3.13888300 | 4.97275200  |
| H | 0.86740600  | 3.71024600  | 2.09187400  | C  | -3.41828000 | -1.88491800 | 3.25425800  |
| H | 2.51652400  | 5.48851200  | 1.56983600  | H  | -1.90814400 | -0.40156800 | 2.64763000  |
| H | 5.27141500  | 2.50947600  | 0.15236300  | H  | -2.15486000 | -1.69554600 | 1.45650100  |
| H | 3.61742200  | 0.74027700  | 0.65427400  | H  | -2.68977900 | -1.57315200 | 5.28559800  |
| H | 6.02808900  | 4.92351500  | 0.77812500  | H  | -3.57759500 | -3.10146200 | 5.09457700  |
| H | 5.04583900  | 5.40133400  | -0.60684900 | H  | -4.12016800 | -1.05222300 | 3.35659200  |
| H | 4.76720300  | 6.15689000  | 0.96716900  | H  | -3.92522300 | -2.69081200 | 2.71081000  |
| O | 1.67847200  | -3.50822100 | 2.22932300  | Li | -1.47221000 | 2.12560100  | -4.00428800 |
| O | 1.44581100  | -1.79178500 | 4.93554000  | O  | -2.09119200 | 3.62499300  | -5.24984100 |
| C | 2.88464800  | -3.38173000 | 1.43338600  | O  | 0.53069600  | 2.31439100  | -4.14600600 |
| C | 2.56742300  | -4.06776200 | 0.10827800  | O  | -1.74166600 | 0.52521900  | -5.24601600 |
| C | 1.64513600  | -5.21016300 | 0.55944200  | C  | -2.28932000 | 5.03196500  | -4.96058400 |
| C | 0.83161900  | -4.55192200 | 1.67659100  | C  | -2.48081100 | 3.34652200  | -6.61969000 |
| C | 1.07829600  | -0.58688900 | 5.66253500  | C  | 1.51362400  | 1.91725200  | -3.15581600 |
| C | 2.34891100  | -0.13705500 | 6.38090200  | C  | 1.17274700  | 3.09257200  | -5.18865800 |
| C | 3.05451200  | -1.47396100 | 6.65217400  | C  | -0.67541100 | -0.27419200 | -5.78868800 |
| C | 2.74422200  | -2.25887600 | 5.37768400  | C  | -2.96222900 | -0.08319800 | -5.71181700 |
| H | 3.10647800  | -2.31653800 | 1.34165500  | C  | -3.10815700 | 5.58581300  | -6.12578600 |
| H | 3.70941400  | -3.88200500 | 1.95915600  | H  | -2.79167300 | 5.11946200  | -3.99425500 |
| H | 3.46801300  | -4.41493000 | -0.40716300 | H  | -1.30745900 | 5.51775900  | -4.89311700 |
| H | 2.03045600  | -3.37905200 | -0.55421600 | C  | -2.63330700 | 4.70910900  | -7.29272900 |
| H | 1.00565500  | -5.59336500 | -0.24124400 | H  | -1.71308000 | 2.71436500  | -7.07266400 |
| H | 2.23706500  | -6.04452500 | 0.95352200  | H  | -3.43018600 | 2.79808300  | -6.60846700 |
| H | 0.56418700  | -5.24286700 | 2.48246400  | C  | 2.66244600  | 2.90447100  | -3.32401100 |
| H | -0.08175600 | -4.08317600 | 1.29543200  | H  | 1.03272200  | 1.94008800  | -2.17736100 |
| H | 0.69562300  | 0.14120500  | 4.94271400  | H  | 1.84084400  | 0.89028900  | -3.36939800 |
| H | 0.28278900  | -0.84393900 | 6.37418700  | C  | 2.66649900  | 3.11910600  | -4.84506100 |
| H | 2.13111200  | 0.43165800  | 7.28986000  | H  | 0.96441800  | 2.62659600  | -6.15754000 |
|   |             |             |             | H  | 0.73417200  | 4.09583900  | -5.18172200 |

|   |             |             |             |    |             |             |             |
|---|-------------|-------------|-------------|----|-------------|-------------|-------------|
| C | -1.16122400 | -1.72603100 | -5.66950900 | H  | -1.55823600 | 5.13016700  | -3.23289300 |
| H | -0.51345500 | 0.00500100  | -6.84076600 | H  | -3.33464800 | 4.36463400  | -1.61747200 |
| H | 0.22646900  | -0.04835800 | -5.21915000 | H  | -2.44917300 | 5.11925100  | -0.29650500 |
| C | -2.70970900 | -1.60099000 | -5.67030800 | H  | -0.48528700 | 3.58583300  | -0.75232100 |
| H | -3.76933500 | 0.25419800  | -5.06141300 | H  | -1.38935700 | 2.84223700  | -2.06855600 |
| H | -3.16082200 | 0.25655400  | -6.73803200 | H  | -3.13567300 | 2.09075000  | -0.45937000 |
| H | -2.93251900 | 6.65411100  | -6.28265200 | H  | -1.29641200 | -0.91502500 | -1.12350100 |
| H | -4.17896500 | 5.43540200  | -5.94588500 | H  | 2.27578300  | 2.77819300  | 0.76737300  |
| H | -3.33833400 | 4.67851600  | -8.12874200 | H  | 3.74618400  | 4.08042100  | -0.74350300 |
| H | -1.66646100 | 5.06331300  | -7.66988700 | H  | 5.59344100  | 0.43891000  | -2.08271100 |
| H | 3.60745300  | 2.51104200  | -2.93854800 | H  | 4.10003900  | -0.86339300 | -0.58156600 |
| H | 2.43887300  | 3.84035800  | -2.79909700 | H  | 6.43944500  | 2.52391300  | -2.90477700 |
| H | 3.13994800  | 4.05659400  | -5.15160800 | H  | 5.09296600  | 3.61437900  | -3.26520600 |
| H | 3.19023600  | 2.29459800  | -5.34289700 | H  | 6.16946800  | 3.96899900  | -1.91503700 |
| H | -0.81038400 | -2.16928000 | -4.73300200 | Li | -0.97119900 | -1.40250900 | 1.01688600  |
| H | -0.78555500 | -2.34063700 | -6.49296300 | O  | -0.91079500 | -3.35113600 | 0.61520100  |
| H | -3.13638600 | -2.03844800 | -4.76353800 | O  | -1.56080200 | -1.32919500 | 2.90094300  |
| H | -3.16903400 | -2.09863800 | -6.52953000 | C  | 0.34241700  | -3.95296400 | 0.21051100  |
| C | -3.64931400 | 1.55853700  | -2.29428900 | C  | 0.09251700  | -4.42521200 | -1.21661700 |
| C | -4.20154500 | 0.25669300  | -2.07430200 | C  | -1.35776600 | -4.93190200 | -1.13022500 |
| C | -4.50640900 | 2.43463600  | -3.03587900 | C  | -2.00162000 | -3.98198600 | -0.10484400 |
| C | -5.43987700 | -0.13445600 | -2.58066900 | C  | -1.37805300 | -0.06889000 | 3.60639700  |
| H | -3.66381800 | -0.44530300 | -1.44628700 | C  | -0.66712600 | -0.43790500 | 4.90448300  |
| C | -5.74915600 | 2.04511800  | -3.52450800 | C  | -1.25554000 | -1.82352300 | 5.20872600  |
| H | -4.17048500 | 3.44705900  | -3.24201200 | C  | -1.36663800 | -2.43931900 | 3.81227000  |
| C | -6.23754700 | 0.74661900  | -3.31973900 | H  | 1.11859300  | -3.19227900 | 0.32124700  |
| H | -5.80149000 | -1.13913500 | -2.36329700 | H  | 0.56674700  | -4.79946500 | 0.87672100  |
| H | -6.34740500 | 2.76756800  | -4.07885100 | H  | 0.79851200  | -5.19894700 | -1.53409000 |
| H | -7.20816800 | 0.44259300  | -3.70299700 | H  | 0.17090200  | -3.57956300 | -1.90966900 |

## 9-CN

E= -1807.780957 H

|   |             |             |             |   |             |             |             |
|---|-------------|-------------|-------------|---|-------------|-------------|-------------|
| C | -1.69314800 | 5.62103600  | -2.25740200 | H | -0.80138200 | 0.59532800  | 2.96069600  |
| C | -2.32368400 | 4.62813200  | -1.27208100 | H | -2.36727500 | 0.36851300  | 3.79520700  |
| C | -1.49644300 | 3.34908300  | -1.10106600 | H | -0.84587100 | 0.29370100  | 5.69856700  |
| C | -2.11160100 | 2.30791200  | -0.13061800 | H | 0.41195900  | -0.50274400 | 4.72664300  |
| C | -1.31310100 | 0.99057200  | -0.12349500 | H | -0.63039800 | -2.42690000 | 5.87429500  |
| C | -1.94327600 | -0.16519700 | -0.66342500 | H | -2.24747900 | -1.72519800 | 5.66599000  |
| N | -0.12691600 | 1.10471800  | 0.43915900  | H | -2.21098800 | -3.12799400 | 3.70410100  |
| N | 0.54517800  | -0.16699500 | 0.46538300  | H | -0.44739700 | -2.96666800 | 3.53031900  |
| C | 3.08953400  | 0.87306400  | 0.17508000  | C | -2.51900200 | 6.90018900  | -2.44497500 |
| C | 2.99268200  | 2.26943800  | 0.13239600  | H | -2.65670800 | 7.38780900  | -1.46918800 |
| C | 3.82647700  | 2.99519900  | -0.71659100 | H | -3.52567600 | 6.63245000  | -2.79729400 |
| C | 4.77395300  | 2.35431900  | -1.53129600 | C | -1.88521500 | 7.89293000  | -3.42364400 |
| C | 4.86003800  | 0.95724400  | -1.46825200 | H | -1.76748500 | 7.44969900  | -4.42096300 |
| C | 4.02434700  | 0.21833900  | -0.62791500 | H | -2.49909200 | 8.79558100  | -3.53242800 |
| C | 5.66723800  | 3.15362300  | -2.45037900 | H | -0.89040900 | 8.20793300  | -3.08309900 |
| S | 1.96373000  | -0.08311700 | 1.22488600  | H | -2.88411700 | -0.01654300 | -1.19377600 |
| O | 1.97021900  | 0.64698500  | 2.52425700  | C | -2.23227000 | 2.86144800  | 1.22688000  |
| O | 2.51028600  | -1.46936500 | 1.25136500  | N | -2.36445800 | 3.30438300  | 2.29447200  |
| H | -0.68490400 | 5.88799900  | -1.90767100 |   |             |             |             |



## 10-CN

E= -1807.818843 H

|    |             |             |             |
|----|-------------|-------------|-------------|
| C  | -2.17314900 | 1.62513100  | -1.98202500 |
| C  | -1.52651300 | 0.45282500  | -1.26310900 |
| C  | -2.08875600 | -0.86058100 | -1.47088300 |
| N  | -0.50479800 | 0.81567600  | -0.52429500 |
| N  | 0.13727000  | -0.23094700 | 0.17214400  |
| C  | 2.70644100  | 0.84750800  | -0.03423000 |
| C  | 2.61357000  | 2.09434300  | -0.66573800 |
| C  | 3.61125600  | 2.49539200  | -1.55115300 |
| C  | 4.71931800  | 1.67592100  | -1.82206300 |
| C  | 4.79572900  | 0.43542200  | -1.17566500 |
| C  | 3.79774700  | 0.01673100  | -0.29266600 |
| C  | 5.79202700  | 2.12775300  | -2.78420600 |
| S  | 1.37375800  | 0.29458300  | 1.05733600  |
| O  | 1.12050700  | 1.45433200  | 1.95450400  |
| O  | 1.87089200  | -0.95919700 | 1.71655500  |
| H  | -2.13323200 | 1.51552600  | -3.07471600 |
| H  | -3.23089900 | 1.74996000  | -1.71377500 |
| H  | 1.76970400  | 2.74330100  | -0.46027200 |
| H  | 3.53266800  | 3.46514100  | -2.03863600 |
| H  | 5.64876700  | -0.21337900 | -1.36283700 |
| H  | 3.86728000  | -0.94415600 | 0.20633200  |
| H  | 6.60660800  | 1.39893500  | -2.84753100 |
| H  | 5.38843100  | 2.26573600  | -3.79579400 |
| H  | 6.22386600  | 3.08962500  | -2.47994100 |
| Li | 0.10165800  | -2.18063400 | 1.05429700  |
| O  | 1.21421800  | -3.88352600 | 1.30218200  |
| O  | -1.05463600 | -2.17462000 | 2.73192900  |
| C  | 2.29423900  | -3.99838000 | 0.34570800  |
| C  | 2.07948200  | -5.33304100 | -0.36606000 |
| C  | 1.44752300  | -6.18492800 | 0.74460400  |
| C  | 0.55640800  | -5.16410100 | 1.45592500  |
| C  | -2.23148700 | -1.33421600 | 2.72453800  |
| C  | -1.95722700 | -0.26208900 | 3.77336000  |
| C  | -1.20867200 | -1.06665500 | 4.84770900  |
| C  | -0.37818400 | -2.05079900 | 4.01118500  |
| H  | 2.25644100  | -3.13402000 | -0.32235200 |
| H  | 3.24896600  | -3.97784100 | 0.88883800  |
| H  | 3.01194600  | -5.74975500 | -0.75982600 |
| H  | 1.37582300  | -5.20730600 | -1.19634900 |
| H  | 0.87660800  | -7.03825200 | 0.36575800  |
| H  | 2.22159000  | -6.56373700 | 1.42326100  |
| H  | 0.43738500  | -5.36206500 | 2.52633100  |
| H  | -0.43284600 | -5.09823700 | 0.99125500  |
| H  | -2.35888100 | -0.94716700 | 1.71123000  |
| H  | -3.11003400 | -1.94145500 | 2.98770200  |
| H  | -2.87375300 | 0.20783000  | 4.14391900  |
| H  | -1.30809000 | 0.51259400  | 3.35063300  |
| H  | -0.57904900 | -0.44493000 | 5.49151600  |
| H  | -1.92058900 | -1.60474500 | 5.48514700  |

|   |             |             |             |
|---|-------------|-------------|-------------|
| H | -0.30773000 | -3.04407700 | 4.46889500  |
| H | 0.62969000  | -1.67573500 | 3.81248500  |
| C | -3.39086600 | -1.07627700 | -2.24326500 |
| H | -3.48322300 | -0.33153900 | -3.04513300 |
| H | -3.35531800 | -2.05025300 | -2.75396900 |
| C | -4.67585800 | -1.03870400 | -1.38839700 |
| H | -4.58988400 | -1.78998800 | -0.58967200 |
| H | -4.74680000 | -0.06429200 | -0.88302600 |
| C | -5.95874900 | -1.29544300 | -2.19020500 |
| H | -6.05185400 | -0.53930400 | -2.98512800 |
| H | -5.87668900 | -2.26602500 | -2.70330700 |
| C | -7.23318300 | -1.28630300 | -1.33551700 |
| H | -7.13555800 | -2.03330200 | -0.53455500 |
| H | -7.32673000 | -0.31222700 | -0.83386100 |
| C | -8.50598300 | -1.56836700 | -2.13911900 |
| H | -8.46325400 | -2.55527900 | -2.61782400 |
| H | -9.39817700 | -1.54827700 | -1.50081600 |
| H | -8.65006200 | -0.82371300 | -2.93279600 |
| H | -1.64323100 | 2.54325800  | -1.71211500 |
| C | -1.53532800 | -2.01966600 | -0.94628100 |
| N | -1.14396700 | -3.07285600 | -0.55666300 |

## 11-CN

E= -1807.805832 H

|    |             |             |             |
|----|-------------|-------------|-------------|
| C  | -2.25211200 | 1.77306600  | -1.00696100 |
| C  | -1.40454500 | 0.55799500  | -0.68955900 |
| C  | -1.95996000 | -0.79742200 | -0.89385800 |
| N  | -0.21805700 | 0.82892100  | -0.21883100 |
| N  | 0.50463900  | -0.30066900 | 0.22562500  |
| C  | 3.06589000  | 0.59715400  | -0.33510100 |
| C  | 3.01584200  | 1.88490400  | -0.88152100 |
| C  | 3.88367900  | 2.23167300  | -1.91482600 |
| C  | 4.81826300  | 1.31337800  | -2.42072900 |
| C  | 4.85638400  | 0.03207700  | -1.85522800 |
| C  | 3.98671400  | -0.33014000 | -0.82431400 |
| C  | 5.75229700  | 1.70390300  | -3.54145300 |
| S  | 1.89132300  | 0.11661900  | 0.95700800  |
| O  | 1.81821400  | 1.30185600  | 1.85409200  |
| O  | 2.42391700  | -1.13927500 | 1.55202800  |
| H  | -2.51633000 | 1.81709600  | -2.07301100 |
| H  | -3.20106400 | 1.74729500  | -0.45406700 |
| H  | 2.30892500  | 2.60953300  | -0.49196700 |
| H  | 3.83881000  | 3.23500900  | -2.33388300 |
| H  | 5.57758400  | -0.69393200 | -2.22456600 |
| H  | 4.02665900  | -1.32368700 | -0.38949800 |
| H  | 6.44188800  | 0.89036500  | -3.78921900 |
| H  | 5.19707500  | 1.96065500  | -4.45300000 |
| H  | 6.35252000  | 2.58383200  | -3.27648500 |
| Li | -0.87241800 | -1.53619100 | 1.02993800  |
| O  | -0.64383000 | -3.48015400 | 1.24001400  |
| O  | -1.51116400 | -1.01466800 | 2.83795900  |

|   |             |             |             |   |             |             |             |
|---|-------------|-------------|-------------|---|-------------|-------------|-------------|
| C | 0.63456100  | -4.14727200 | 1.16791600  | N | -0.84420600 | 1.60891100  | -0.21242900 |
| C | 0.40115700  | -5.30375100 | 0.20370400  | N | -0.02662400 | 0.59068600  | 0.34899200  |
| C | -1.01723700 | -5.75750200 | 0.59444100  | C | 1.92940800  | 2.39815200  | 1.24635200  |
| C | -1.70270700 | -4.44929200 | 1.03499400  | C | 1.58431100  | 3.75125800  | 1.31787200  |
| C | -1.89673900 | 0.36232000  | 3.09303100  | C | 2.50351500  | 4.72274400  | 0.92180300  |
| C | -1.00513400 | 0.83369900  | 4.23886600  | C | 3.77463400  | 4.36970200  | 0.44425300  |
| C | -0.81220400 | -0.46051200 | 5.04378000  | C | 4.09980300  | 3.00721000  | 0.37767900  |
| C | -0.69911300 | -1.50946100 | 3.93707600  | C | 3.18733900  | 2.02598600  | 0.76620900  |
| H | 1.36970400  | -3.40732700 | 0.84645800  | C | 4.75549500  | 5.42986300  | 0.00373900  |
| H | 0.91237900  | -4.51217800 | 2.16818100  | S | 0.70006900  | 1.13322400  | 1.66656900  |
| H | 1.14861600  | -6.09619100 | 0.30859100  | O | -0.15116300 | 1.77735300  | 2.70674000  |
| H | 0.42299400  | -4.94011700 | -0.82974700 | O | 1.52543700  | -0.02672700 | 2.17495200  |
| H | -1.55193300 | -6.24217300 | -0.22749700 | H | -2.74039100 | 6.37500700  | -1.41417600 |
| H | -0.97208500 | -6.46504400 | 1.42980300  | H | -1.76719400 | 5.91747500  | -0.02281400 |
| H | -2.26582400 | -4.56590200 | 1.96822700  | H | -0.51847300 | 4.25357300  | -1.42589400 |
| H | -2.37522100 | -4.04445200 | 0.27284400  | H | -1.46498200 | 4.72386300  | -2.83592400 |
| H | -1.75804000 | 0.92881400  | 2.16925400  | H | -3.55689500 | 3.97652400  | -1.66294700 |
| H | -2.95961300 | 0.37775500  | 3.36818700  | H | -2.59453200 | 3.50381300  | -0.26291000 |
| H | -1.46597100 | 1.64088600  | 4.81674000  | H | 0.61043100  | 4.03669000  | 1.70066000  |
| H | -0.04653300 | 1.18389700  | 3.84171700  | H | 2.23177400  | 5.77411100  | 0.99256500  |
| H | 0.07393700  | -0.44458900 | 5.68568300  | H | 5.08270000  | 2.70978500  | 0.01844300  |
| H | -1.68941200 | -0.65815800 | 5.67184600  | H | 3.45545800  | 0.97583200  | 0.70895100  |
| H | -1.07803100 | -2.49428300 | 4.22605600  | H | 5.75276900  | 5.00909900  | -0.16128600 |
| H | 0.33371100  | -1.61330400 | 3.58377100  | H | 4.43497200  | 5.90162900  | -0.93471400 |
| C | -1.21983200 | -1.77983200 | -1.82031200 | H | 4.84423400  | 6.23027300  | 0.74827200  |
| H | -0.17958000 | -1.88596700 | -1.49006300 | O | 1.28760200  | -3.20958600 | 1.76598500  |
| H | -1.68107300 | -2.77505600 | -1.73363500 | O | 1.68667000  | -1.90838400 | 4.64638300  |
| C | -1.21153800 | -1.38150900 | -3.31161100 | C | 2.49351700  | -3.12142600 | 0.96428000  |
| H | -2.24783700 | -1.24593400 | -3.65582100 | C | 2.07869000  | -3.52749200 | -0.44782600 |
| H | -0.71882900 | -0.40397100 | -3.41768700 | C | 0.97305400  | -4.55644300 | -0.17000400 |
| C | -0.50735000 | -2.40255600 | -4.21486000 | C | 0.26728800  | -3.95013400 | 1.04355000  |
| H | 0.52308300  | -2.55427400 | -3.85839400 | C | 1.72907500  | -0.75582800 | 5.52996200  |
| H | -1.00966500 | -3.37811900 | -4.12062700 | C | 3.15837300  | -0.69904900 | 6.06742000  |
| C | -0.47272300 | -1.99671400 | -5.69436100 | C | 3.55497000  | -2.18300200 | 6.08239100  |
| H | -1.50051500 | -1.82666900 | -6.04683800 | C | 2.89055400  | -2.69831100 | 4.80690900  |
| H | 0.04658100  | -1.03245500 | -5.79159300 | H | 2.86790000  | -2.09727700 | 1.03359600  |
| C | 0.20599300  | -3.03319300 | -6.59467300 | H | 3.24147100  | -3.81008100 | 1.37917800  |
| H | -0.31256800 | -3.99974100 | -6.54826200 | H | 2.91480900  | -3.93314400 | -1.02546500 |
| H | 0.21366900  | -2.71156400 | -7.64369400 | H | 1.67133500  | -2.66358000 | -0.98460900 |
| H | 1.24760700  | -3.20300700 | -6.29254400 | H | 0.29055600  | -4.69723700 | -1.01327000 |
| H | -1.72255500 | 2.69227300  | -0.73521400 | H | 1.41027000  | -5.52928100 | 0.08459700  |
| C | -3.35720100 | -0.92863800 | -0.90398500 | H | -0.15734800 | -4.69773500 | 1.72049300  |
| N | -4.52832100 | -1.08957000 | -0.87420000 | H | -0.52300500 | -3.25221100 | 0.74610400  |

## 12-CN

E= -2745.200252 H

|   |             |            |             |   |             |             |             |
|---|-------------|------------|-------------|---|-------------|-------------|-------------|
| C | -1.74317900 | 6.01210300 | -1.11904000 | H | 1.43921800  | 0.12433600  | 4.95098800  |
| C | -1.50043300 | 4.63033000 | -1.74002700 | H | 1.00046400  | -0.91204000 | 6.33593500  |
| C | -2.57302500 | 3.59016500 | -1.35819400 | H | 3.21067400  | -0.22420700 | 7.05159500  |
| C | -2.36237600 | 2.20186500 | -1.94433700 | H | 3.80257800  | -0.13826400 | 5.38019400  |
| C | -1.46898900 | 1.25288500 | -1.30428900 | H | 4.63702700  | -2.34462300 | 6.07824200  |
|   |             |            |             | H | 3.13452100  | -2.68329700 | 6.96288300  |
|   |             |            |             | H | 2.60319500  | -3.75307000 | 4.85151300  |
|   |             |            |             | H | 3.53464700  | -2.54544300 | 3.93149000  |
|   |             |            |             | C | -0.69310400 | 7.06043500  | -1.51003400 |

|    |             |             |             |
|----|-------------|-------------|-------------|
| H  | -0.66662900 | 7.15641500  | -2.60541400 |
| H  | 0.30269300  | 6.70272400  | -1.21173100 |
| C  | -0.94716800 | 8.43685600  | -0.88792500 |
| H  | -0.94630800 | 8.38507700  | 0.20862600  |
| H  | -0.17900300 | 9.16142300  | -1.18579800 |
| H  | -1.92025500 | 8.83994100  | -1.19749200 |
| C  | -1.29888800 | -0.12823600 | -1.90710000 |
| H  | -0.24188700 | -0.32980600 | -2.12036400 |
| H  | -1.62372900 | -0.90484300 | -1.20323400 |
| H  | -1.86861700 | -0.24450700 | -2.83320800 |
| Li | 0.78506800  | -1.63366600 | 2.87590000  |
| O  | -1.12666300 | -1.91988800 | 3.29785500  |
| C  | -1.53288100 | -2.80405700 | 4.36240500  |
| C  | -2.24703200 | -1.06727300 | 2.91809500  |
| C  | -2.65648500 | -2.06027300 | 5.07531000  |
| H  | -1.89058800 | -3.75355600 | 3.93755800  |
| H  | -0.65287600 | -2.99854600 | 4.97965300  |
| C  | -3.38655500 | -1.39852100 | 3.89483100  |
| H  | -1.90563800 | -0.03237700 | 2.99469900  |
| H  | -2.50693400 | -1.27410800 | 1.87515300  |
| H  | -2.23791700 | -1.30163400 | 5.74721000  |
| H  | -3.29729400 | -2.72658600 | 5.66099500  |
| H  | -3.94698700 | -0.50482000 | 4.18430400  |
| H  | -4.09073900 | -2.10607400 | 3.44233000  |
| Li | -4.21710400 | 1.38117600  | -5.97327500 |
| O  | -5.59551600 | 2.68052400  | -6.54498000 |
| O  | -2.76224700 | 1.56434600  | -7.31590700 |
| O  | -4.97976200 | -0.43450400 | -6.25945600 |
| C  | -5.44547900 | 4.07489000  | -6.16803700 |
| C  | -7.00237300 | 2.34683400  | -6.65985700 |
| C  | -1.35929100 | 1.37790600  | -6.99018800 |
| C  | -2.89267800 | 2.19852100  | -8.61155400 |
| C  | -4.59082700 | -1.27661000 | -7.37051100 |
| C  | -5.42967200 | -1.25836400 | -5.14871000 |
| C  | -6.84295300 | 4.54883800  | -5.77156100 |
| H  | -4.71407400 | 4.13152100  | -5.35709200 |
| H  | -5.06119800 | 4.62852700  | -7.03424400 |
| C  | -7.74048500 | 3.68418500  | -6.66933100 |
| H  | -7.14054700 | 1.76009800  | -7.57273800 |
| H  | -7.29145100 | 1.73333700  | -5.79732500 |
| C  | -0.58589000 | 2.19275100  | -8.02554400 |
| H  | -1.20458600 | 1.70565200  | -5.95944300 |
| H  | -1.12616800 | 0.30755400  | -7.05978800 |
| C  | -1.50790700 | 2.11194600  | -9.25174500 |
| H  | -3.67232200 | 1.67493000  | -9.17322100 |
| H  | -3.20474600 | 3.24007100  | -8.46498400 |
| C  | -4.36142500 | -2.65865600 | -6.76626400 |
| H  | -5.40350800 | -1.29220400 | -8.11008600 |
| H  | -3.70372600 | -0.83186600 | -7.82763300 |
| C  | -5.43400300 | -2.69927100 | -5.66733200 |
| H  | -4.72898200 | -1.11960100 | -4.31843800 |
| H  | -6.41770400 | -0.90715900 | -4.83457600 |

|   |             |             |             |
|---|-------------|-------------|-------------|
| H | -6.97536500 | 5.62303600  | -5.93029100 |
| H | -7.03506600 | 4.32996900  | -4.71480200 |
| H | -8.76584700 | 3.59290000  | -6.29924800 |
| H | -7.77541500 | 4.09446000  | -7.68558600 |
| H | 0.41429000  | 1.78810800  | -8.20576300 |
| H | -0.48186100 | 3.23218800  | -7.69306000 |
| H | -1.33763500 | 2.91226700  | -9.97783200 |
| H | -1.38177000 | 1.15022400  | -9.76351600 |
| H | -3.35849400 | -2.71993900 | -6.32742800 |
| H | -4.46534800 | -3.45884500 | -7.50521300 |
| H | -5.21541400 | -3.42013100 | -4.87422200 |
| H | -6.40997500 | -2.95091000 | -6.09845700 |
| C | -3.00990000 | 1.89519800  | -3.11454300 |
| N | -3.60101800 | 1.66318300  | -4.12398400 |

### 9-NO<sub>2</sub>

E= -1920.043185 H

|    |             |             |             |
|----|-------------|-------------|-------------|
| C  | -1.72546100 | 5.91789700  | -1.20472000 |
| C  | -2.41821700 | 4.55915200  | -1.37256600 |
| C  | -1.54804300 | 3.38768200  | -0.89580200 |
| C  | -2.18358300 | 2.01419200  | -1.12135300 |
| C  | -1.35665400 | 0.78435600  | -0.72124000 |
| C  | -1.94261300 | -0.50223900 | -0.94456900 |
| N  | -0.20946300 | 1.06599200  | -0.14560000 |
| N  | 0.45045100  | -0.13063500 | 0.26742200  |
| C  | 3.04632100  | 0.75981600  | -0.11680700 |
| C  | 3.02119800  | 2.09188900  | -0.54763300 |
| C  | 3.93830900  | 2.52854700  | -1.50166200 |
| C  | 4.89995700  | 1.65843700  | -2.04060500 |
| C  | 4.91247900  | 0.33117600  | -1.59204200 |
| C  | 3.99332900  | -0.12037600 | -0.64241000 |
| C  | 5.88816100  | 2.14727500  | -3.07285900 |
| S  | 1.81573000  | 0.16693400  | 1.07553000  |
| O  | 1.75176300  | 1.24641300  | 2.09998800  |
| O  | 2.31234400  | -1.15676200 | 1.54749400  |
| H  | -1.45126700 | 6.05685900  | -0.14857100 |
| H  | -0.78019300 | 5.91579000  | -1.76766500 |
| H  | -2.68404000 | 4.41491600  | -2.43020100 |
| H  | -3.36556400 | 4.57303200  | -0.81480600 |
| H  | -1.29946000 | 3.49822900  | 0.16328700  |
| H  | -0.59790600 | 3.38481900  | -1.44034300 |
| H  | -2.51513400 | 1.91152600  | -2.15711000 |
| H  | -1.24146300 | -1.29504000 | -1.22254900 |
| H  | 2.29768800  | 2.78197700  | -0.12739600 |
| H  | 3.91339200  | 3.56630600  | -1.82909300 |
| H  | 5.65414200  | -0.35972800 | -1.98763300 |
| H  | 4.01417100  | -1.14904800 | -0.29694200 |
| H  | 6.62807000  | 1.37721600  | -3.31485100 |
| H  | 5.38472300  | 2.43021000  | -4.00676400 |
| H  | 6.42876900  | 3.03529000  | -2.72179900 |
| Li | -1.02209700 | -1.39059200 | 0.90449300  |

|   |             |             |             |    |             |             |             |
|---|-------------|-------------|-------------|----|-------------|-------------|-------------|
| O | -0.78004700 | -3.37029000 | 0.80980100  | C  | 6.21393700  | 1.61098600  | -1.17363500 |
| O | -1.63885300 | -1.10570700 | 2.76621300  | S  | 0.41227800  | 0.87069200  | 0.68761300  |
| C | 0.52568100  | -3.94613800 | 0.59142400  | O  | -0.21161400 | 2.21107100  | 0.55416400  |
| C | 0.42945900  | -4.56873100 | -0.79667900 | O  | 0.49068700  | 0.29531300  | 2.05563300  |
| C | -0.99960700 | -5.14627700 | -0.79161500 | H  | -0.75635000 | -0.76036100 | -4.51355300 |
| C | -1.76966600 | -4.20534800 | 0.16029000  | H  | -1.94433500 | 0.49961200  | -4.18706600 |
| C | -1.95598600 | 0.25046600  | 3.18376200  | H  | 1.60226900  | 2.36196600  | -1.52918600 |
| C | -1.07828700 | 0.51976500  | 4.40450600  | H  | 3.94013500  | 2.62969900  | -2.29082000 |
| C | -0.96445100 | -0.87684300 | 5.03319900  | H  | 5.28939400  | 0.20367500  | 0.98961600  |
| C | -0.86579500 | -1.77216800 | 3.79811500  | H  | 2.93744600  | -0.08598300 | 1.73548300  |
| H | 1.25405900  | -3.13919500 | 0.69435500  | H  | 6.91427400  | 1.05761500  | -0.53961300 |
| H | 0.72008300  | -4.71109100 | 1.35906300  | H  | 6.34820600  | 1.26313900  | -2.20577100 |
| H | 1.19625800  | -5.32965700 | -0.97267200 | H  | 6.50764600  | 2.66846400  | -1.15400100 |
| H | 0.53358900  | -3.78975300 | -1.56036000 | Li | -0.06884900 | -2.22161200 | 0.39573700  |
| H | -1.44705500 | -5.17442900 | -1.78933000 | O  | 1.70758100  | -3.20881700 | 0.55008000  |
| H | -0.99602600 | -6.16820600 | -0.39723100 | O  | -1.01049500 | -2.76381100 | 2.08719600  |
| H | -2.32853400 | -4.75869700 | 0.92505400  | C  | 2.63321000  | -2.92016500 | -0.53022700 |
| H | -2.46185800 | -3.53699800 | -0.36002900 | C  | 2.83670800  | -4.23948300 | -1.27554800 |
| H | -1.75994300 | 0.92071100  | 2.34495500  | C  | 2.64825900  | -5.27293000 | -0.15477700 |
| H | -3.02481700 | 0.29065600  | 3.43110800  | C  | 1.52375100  | -4.64313100 | 0.66559800  |
| H | -1.51928600 | 1.26339000  | 5.07589700  | C  | -2.35715800 | -2.23635500 | 2.20080400  |
| H | -0.09492300 | 0.87623700  | 4.08017900  | C  | -2.41646900 | -1.54229300 | 3.56030400  |
| H | -0.09732200 | -0.98724400 | 5.69166900  | C  | -1.43957800 | -2.38557100 | 4.39262200  |
| H | -1.86718100 | -1.11517100 | 5.60936400  | C  | -0.34335900 | -2.69207000 | 3.37119000  |
| H | -1.28365000 | -2.77258000 | 3.94606400  | H  | 2.20195700  | -2.12808800 | -1.14740000 |
| H | 0.17001200  | -1.86556200 | 3.45003500  | H  | 3.57127600  | -2.55601300 | -0.09265300 |
| C | -2.58498900 | 7.10288800  | -1.66348900 | H  | 3.81710400  | -4.29513600 | -1.75873200 |
| H | -3.52735900 | 7.10786600  | -1.09694200 | H  | 2.06451400  | -4.36551900 | -2.04223000 |
| H | -2.86350900 | 6.96220800  | -2.71795000 | H  | 2.38250600  | -6.26879200 | -0.52248400 |
| C | -1.88663000 | 8.45563100  | -1.49866500 | H  | 3.56222400  | -5.35990900 | 0.44570200  |
| H | -0.95741400 | 8.49845000  | -2.08132100 | H  | 1.55548700  | -4.90654200 | 1.72728400  |
| H | -2.52656000 | 9.28100400  | -1.83445300 | H  | 0.53829000  | -4.90034600 | 0.26087700  |
| H | -1.62661700 | 8.64396000  | -0.44904900 | H  | -2.53026800 | -1.56069900 | 1.36014400  |
| H | -2.85001200 | -0.51730200 | -1.55005600 | H  | -3.06411800 | -3.07301400 | 2.13617100  |
| N | -3.50257900 | 1.95316900  | -0.34844600 | H  | -3.43107200 | -1.51677000 | 3.97002100  |
| O | -4.52244000 | 1.64934500  | -0.97013800 | H  | -2.04653800 | -0.51549800 | 3.47120500  |
| O | -3.48762600 | 2.22249300  | 0.85347100  | H  | -1.05074100 | -1.86014000 | 5.27042500  |

## 10- NO<sub>2</sub>

E= -1920.099157 H

|   |             |             |             |   |             |             |             |
|---|-------------|-------------|-------------|---|-------------|-------------|-------------|
| C | -1.00970900 | 0.05493200  | -3.82105700 | C | -3.60990800 | -1.22328600 | -2.55592200 |
| C | -1.12515200 | -0.44932400 | -2.39301600 | H | -3.63670100 | -0.43833900 | -3.32141000 |
| C | -2.18166600 | -1.44510200 | -2.11726700 | H | -3.99136400 | -2.14432600 | -3.01888800 |
| N | -0.29653700 | 0.10351400  | -1.56095600 | C | -4.57259100 | -0.82826500 | -1.41633900 |
| N | -0.30609000 | -0.28530300 | -0.22943600 | H | -4.53032300 | -1.61280100 | -0.65200400 |
| C | 2.12345900  | 1.10271800  | 0.14170200  | H | -4.21796200 | 0.10042300  | -0.94703800 |
| C | 2.40730300  | 1.87614100  | -0.99020400 | C | -6.01996800 | -0.64298000 | -1.88909600 |
| C | 3.72736500  | 2.02823500  | -1.40923900 | H | -6.05772700 | 0.14624900  | -2.65616700 |
| C | 4.78801900  | 1.42724700  | -0.71209300 | H | -6.36088800 | -1.56500500 | -2.38464200 |
| C | 4.48353700  | 0.66750400  | 0.42482100  | C | -6.99598100 | -0.29271000 | -0.75823000 |
| C | 3.16330300  | 0.49858500  | 0.84967000  | H | -6.96385500 | -1.08499900 | 0.00346100  |
|   |             |             |             | H | -6.65675300 | 0.62559000  | -0.25774400 |

|   |             |             |             |
|---|-------------|-------------|-------------|
| C | -8.43843200 | -0.10658600 | -1.23769900 |
| H | -8.81960900 | -1.01853900 | -1.71561500 |
| H | -9.11086000 | 0.13748800  | -0.40576700 |
| H | -8.51171600 | 0.70566600  | -1.97251800 |
| H | -0.22709300 | 0.81746400  | -3.88124900 |
| N | -1.91569300 | -2.60886200 | -1.51690600 |
| O | -0.67544200 | -2.94222400 | -1.23021800 |
| O | -2.84318500 | -3.45204600 | -1.25948700 |

## 11- NO<sub>2</sub>

E= -1920.083686H

|    |             |             |             |
|----|-------------|-------------|-------------|
| C  | -1.91491100 | 1.41178400  | -1.44270100 |
| C  | -1.11288800 | 0.31976800  | -0.77130900 |
| C  | -1.35094000 | -1.09924700 | -1.13768100 |
| N  | -0.18227100 | 0.70323800  | 0.04803400  |
| N  | 0.50541900  | -0.33109100 | 0.68701000  |
| C  | 2.98879400  | 0.89560400  | 0.83591000  |
| C  | 2.91251600  | 2.18070800  | 0.28777600  |
| C  | 3.97107200  | 2.66755600  | -0.47649700 |
| C  | 5.11967000  | 1.89351600  | -0.70728000 |
| C  | 5.17846900  | 0.61314900  | -0.14058300 |
| C  | 4.12261600  | 0.11063900  | 0.62217100  |
| C  | 6.24969500  | 2.42431200  | -1.55658500 |
| S  | 1.58866100  | 0.23294200  | 1.76919700  |
| O  | 1.10999100  | 1.36413400  | 2.60411700  |
| O  | 2.08727400  | -0.97293300 | 2.48043100  |
| H  | -1.68213100 | 1.47170600  | -2.51626600 |
| H  | -2.98366300 | 1.19488400  | -1.35091100 |
| H  | 2.03598000  | 2.79417700  | 0.46636300  |
| H  | 3.90728800  | 3.66853500  | -0.89806900 |
| H  | 6.06366800  | 0.00008200  | -0.29542200 |
| H  | 4.17926400  | -0.87964800 | 1.06217600  |
| H  | 7.16226600  | 1.83377400  | -1.42417800 |
| H  | 5.99082600  | 2.39642600  | -2.62378700 |
| H  | 6.48101700  | 3.46760200  | -1.31155000 |
| Li | -0.64205700 | -1.90354700 | 1.11837400  |
| O  | -0.22838500 | -3.80298200 | 1.07413400  |
| O  | -1.84568000 | -1.75294600 | 2.67116400  |
| C  | 1.02553200  | -4.44044200 | 0.73418300  |
| C  | 0.64869000  | -5.65278200 | -0.11455600 |
| C  | -0.69864200 | -6.06555300 | 0.49793400  |
| C  | -1.33896400 | -4.71648600 | 0.83318100  |
| C  | -2.89029900 | -0.74881000 | 2.69017400  |
| C  | -2.36307600 | 0.31916300  | 3.63855200  |
| C  | -1.70265800 | -0.53478100 | 4.73662100  |
| C  | -1.18335600 | -1.76449500 | 3.96662500  |
| H  | 1.64883000  | -3.70833400 | 0.21450700  |
| H  | 1.53158100  | -4.74000700 | 1.66154400  |
| H  | 1.40619900  | -6.44132900 | -0.06772800 |
| H  | 0.51969800  | -5.35928300 | -1.16274300 |
| H  | -1.31934900 | -6.65480800 | -0.18367400 |

|   |             |             |             |
|---|-------------|-------------|-------------|
| H | -0.53799000 | -6.65387900 | 1.40929800  |
| H | -1.95844900 | -4.74365300 | 1.73463900  |
| H | -1.92889100 | -4.31230200 | 0.00248100  |
| H | -3.05384500 | -0.43780600 | 1.65592900  |
| H | -3.81563300 | -1.20387100 | 3.07501600  |
| H | -3.15522500 | 0.97074200  | 4.02114100  |
| H | -1.61238600 | 0.93265700  | 3.12940900  |
| H | -0.89459400 | -0.00928300 | 5.25388000  |
| H | -2.44466100 | -0.83615900 | 5.48488900  |
| H | -1.41804400 | -2.70708400 | 4.47514100  |
| H | -0.10603400 | -1.71878600 | 3.78216200  |
| C | -0.31611300 | -1.86210300 | -1.93466100 |
| H | 0.67607700  | -1.49242900 | -1.64826900 |
| H | -0.35468600 | -2.92538100 | -1.66617900 |
| C | -0.47827500 | -1.74483200 | -3.46582300 |
| H | -1.48795700 | -2.08289200 | -3.73050100 |
| H | -0.40637100 | -0.68726900 | -3.75869700 |
| C | 0.56206800  | -2.55660500 | -4.24802700 |
| H | 1.57308600  | -2.23599100 | -3.95239400 |
| H | 0.48424500  | -3.61740500 | -3.96312400 |
| C | 0.42219600  | -2.43489600 | -5.77121400 |
| H | -0.58629600 | -2.75642500 | -6.06883400 |
| H | 0.50102700  | -1.37618700 | -6.05789900 |
| C | 1.46423300  | -3.24832500 | -6.54473400 |
| H | 1.38805000  | -4.31829600 | -6.31119800 |
| H | 1.33847600  | -3.13633700 | -7.62890800 |
| H | 2.48432200  | -2.92894700 | -6.29446500 |
| H | -1.69967300 | 2.38509000  | -0.98856300 |
| N | -2.61002100 | -1.60137300 | -1.08607400 |
| O | -2.86784500 | -2.74893400 | -1.60238300 |
| O | -3.55310800 | -0.95836600 | -0.49102300 |

## 12- NO<sub>2</sub>

E= -2857.491284 H

|   |             |            |             |
|---|-------------|------------|-------------|
| C | -2.03575900 | 5.82320300 | -1.14557100 |
| C | -1.79255000 | 4.40152400 | -1.66540000 |
| C | -2.73895100 | 3.35559800 | -1.04347600 |
| C | -2.54037600 | 1.96102100 | -1.58834000 |
| C | -1.76809500 | 0.96489300 | -0.83546400 |
| N | -0.97026600 | 1.45086700 | 0.07407400  |
| N | -0.24902100 | 0.52636700 | 0.81463200  |
| C | 1.80194800  | 2.40117500 | 1.22591900  |
| C | 1.54326200  | 3.77075900 | 1.13411900  |
| C | 2.46400700  | 4.60586100 | 0.50130400  |
| C | 3.64779200  | 4.09568200 | -0.05177000 |
| C | 3.88761200  | 2.71768900 | 0.05437600  |
| C | 2.97366900  | 1.87099600 | 0.68086000  |
| C | 4.62382600  | 5.00477500 | -0.75869300 |
| S | 0.57595000  | 1.30791000 | 1.98112000  |
| O | -0.22036800 | 2.16915900 | 2.88913200  |
| O | 1.38409800  | 0.23758800 | 2.66601200  |
| H | -3.07699300 | 6.11447600 | -1.35313200 |

|   |             |             |             |    |             |             |             |
|---|-------------|-------------|-------------|----|-------------|-------------|-------------|
| H | -1.92845900 | 5.83545500  | -0.05016500 | Li | 0.93757600  | -1.54339600 | 3.17679300  |
| H | -0.75554300 | 4.10641700  | -1.45681200 | O  | -0.88272900 | -2.02891800 | 3.75781600  |
| H | -1.92055800 | 4.38263600  | -2.75534300 | C  | -1.15604100 | -3.28537600 | 4.42742700  |
| H | -3.77508200 | 3.66595600  | -1.22302300 | C  | -2.05702700 | -1.17546100 | 3.80072700  |
| H | -2.57629300 | 3.32480700  | 0.03777900  | C  | -2.50246800 | -3.09910300 | 5.12721300  |
| H | 0.63722500  | 4.17660000  | 1.57060400  | H  | -1.20232600 | -4.07917100 | 3.67108600  |
| H | 2.26089200  | 5.67289600  | 0.44161400  | H  | -0.32779000 | -3.49727400 | 5.10941300  |
| H | 4.80333800  | 2.30107300  | -0.35907100 | C  | -3.20743200 | -2.09448400 | 4.20358100  |
| H | 3.17646800  | 0.80713300  | 0.75229600  | H  | -1.89177400 | -0.38655900 | 4.54508400  |
| H | 5.60403500  | 4.53045100  | -0.87265200 | H  | -2.17275100 | -0.71243700 | 2.81848000  |
| H | 4.26437700  | 5.26382900  | -1.76378400 | H  | -2.36065700 | -2.66596300 | 6.12434100  |
| H | 4.76085600  | 5.94691300  | -0.21546600 | H  | -3.04327000 | -4.04377900 | 5.23757800  |
| O | 1.57653700  | -2.90844900 | 1.87463600  | H  | -4.01947100 | -1.54925400 | 4.69356900  |
| O | 2.01449200  | -1.90346400 | 4.81910600  | H  | -3.61549000 | -2.60404000 | 3.32259600  |
| C | 2.69907700  | -2.54507100 | 1.03474100  | Li | -3.89315700 | 1.50824600  | -5.07830200 |
| C | 2.16985700  | -2.63264700 | -0.39164700 | O  | -5.08437300 | 2.93069100  | -6.15356600 |
| C | 1.23173000  | -3.84603700 | -0.30012700 | O  | -2.38119900 | 1.41222600  | -6.47431400 |
| C | 0.63123100  | -3.70247100 | 1.10394300  | O  | -5.15506600 | -0.06529600 | -5.53632100 |
| C | 1.87670000  | -0.96638400 | 5.91955900  | C  | -4.84236100 | 4.32459900  | -5.84515300 |
| C | 3.29141400  | -0.73856100 | 6.45179600  | C  | -6.50526700 | 2.70367200  | -6.30504400 |
| C | 3.96982700  | -2.08287700 | 6.14764200  | C  | -1.16445900 | 0.68676200  | -6.16152400 |
| C | 3.35797600  | -2.44469700 | 4.79578200  | C  | -2.12082200 | 2.38679300  | -7.51235300 |
| H | 3.02107500  | -1.54348900 | 1.32957700  | C  | -4.84937400 | -0.92091600 | -6.65602500 |
| H | 3.52165000  | -3.25325200 | 1.20674200  | C  | -5.65595900 | -0.86593400 | -4.43332200 |
| H | 2.96895300  | -2.75801400 | -1.12859300 | C  | -6.20344100 | 4.91334400  | -5.47573700 |
| H | 1.60475400  | -1.72610300 | -0.63376900 | H  | -4.11038900 | 4.36397600  | -5.03579100 |
| H | 0.45982600  | -3.85204800 | -1.07502700 | H  | -4.42673000 | 4.81621200  | -6.73618900 |
| H | 1.80429200  | -4.77746200 | -0.38029800 | C  | -7.15089300 | 4.08924500  | -6.35958600 |
| H | 0.49182700  | -4.66384300 | 1.60936800  | H  | -6.66689200 | 2.10982000  | -7.21032100 |
| H | -0.32250000 | -3.16621700 | 1.09099000  | H  | -6.86410400 | 2.12682400  | -5.44435000 |
| H | 1.40079000  | -0.05903400 | 5.53788300  | C  | -0.03180900 | 1.50317000  | -6.77869000 |
| H | 1.22606200  | -1.41887300 | 6.67859500  | H  | -1.12117800 | 0.58356000  | -5.07580000 |
| H | 3.29608800  | -0.47939900 | 7.51460100  | H  | -1.22448200 | -0.31323500 | -6.61457700 |
| H | 3.78215800  | 0.07026600  | 5.89801000  | C  | -0.71107300 | 2.08659800  | -8.02685900 |
| H | 5.06116100  | -2.01925100 | 6.10406100  | H  | -2.89534100 | 2.29619000  | -8.27981200 |
| H | 3.69735500  | -2.82960400 | 6.90292500  | H  | -2.18024700 | 3.39026300  | -7.07371200 |
| H | 3.28898500  | -3.52130500 | 4.61577800  | C  | -4.61892800 | -2.30262200 | -6.05107700 |
| H | 3.91306200  | -1.98316300 | 3.96887800  | H  | -5.69892900 | -0.92908500 | -7.35522900 |
| C | -1.08991800 | 6.86614500  | -1.75554300 | H  | -3.97828600 | -0.49886000 | -7.16273700 |
| H | -1.19486900 | 6.85329100  | -2.85023300 | C  | -5.66064000 | -2.32179500 | -4.92150500 |
| H | -0.05006500 | 6.57616300  | -1.54621800 | H  | -4.97782200 | -0.70765800 | -3.58963500 |
| C | -1.33544800 | 8.28660600  | -1.23863600 | H  | -6.65535900 | -0.50624800 | -4.16262300 |
| H | -1.20395300 | 8.34258900  | -0.15031900 | H  | -6.25660700 | 5.99016500  | -5.66367300 |
| H | -0.64210600 | 9.00535600  | -1.69299400 | H  | -6.42010800 | 4.73674300  | -4.41560100 |
| H | -2.35581300 | 8.62229900  | -1.46490200 | H  | -8.18461800 | 4.07854100  | -6.00042800 |
| N | -3.04592000 | 1.70860800  | -2.79225700 | H  | -7.14859000 | 4.47589600  | -7.38601700 |
| O | -2.85149300 | 0.59901500  | -3.45662800 | H  | 0.84587400  | 0.89066800  | -7.00707100 |
| O | -3.78041500 | 2.60202400  | -3.41869600 | H  | 0.27721400  | 2.30615800  | -6.09859700 |
| C | -1.95645800 | -0.52339200 | -1.01993200 | H  | -0.21488600 | 2.98035300  | -8.41728400 |
| H | -1.09467200 | -0.98043300 | -1.52493800 | H  | -0.74540300 | 1.33678800  | -8.82643700 |
| H | -2.03357200 | -0.99941900 | -0.03509100 | H  | -3.60430000 | -2.37023500 | -5.64134100 |
| H | -2.84128500 | -0.74377700 | -1.61389500 | H  | -4.75345900 | -3.10830300 | -6.77953300 |

|   |             |             |             |
|---|-------------|-------------|-------------|
| H | -5.41485200 | -3.02375400 | -4.11910900 |
| H | -6.64526200 | -2.59348700 | -5.31978000 |
